# Supplementary material for: The Carbon-Based Evolutionary Theory (CBET)
Source: Preprints.org preprint supplement (doi:10.20944/preprints202010.0004.v11), 2021-08-18

# **Explanation of the Carbon-Based Evolutionary Theory (CBET)**

**Prof. Ji-Ming Chen**

The preprint of this article has been published at preprints.org  
<https://www.preprints.org/manuscript/202010.0004/v11>

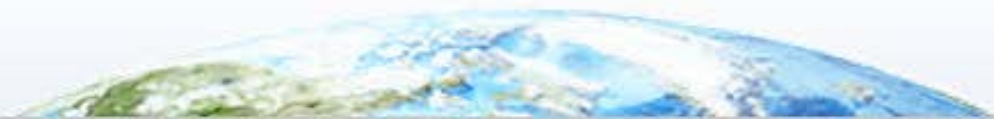

# **1 History & background of the CBET**

2 The primary driving force of evolution

3 The mechanisms of evolution

4 Reliability & significance of the CBET

5 Questions & answers

6 Generalization of the CBET

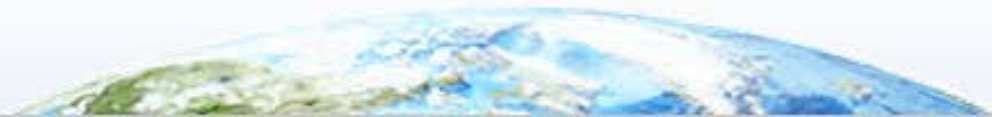

# The infant version of the CBET was published in 2000–2001 as one paper, one book, and one PhD dissertation

 Springer Link

---

Discussion | Published: March 2000

## A new evolutionary theory deduced mathematically from entropy amplification

[Jiming Chen](#) 

*Chinese Science Bulletin* **45**, 91–96(2000) | [Cite this article](#)

12 Accesses | [Metrics](#)

---

### Abstract

A new evolutionary theory which is able to unite the present evolutionary debates is deduced mathematically from the principle of entropy amplification. It suggests that the extensive evolution is driven by the amplification of entropy, or microscopic diversity, and the biological evolution is driven by the amplification of biodiversity. Forming high hierarchies is the most important way for the amplification and brings out spontaneously three kinds of selection. This theory has some positive cultural meanings.

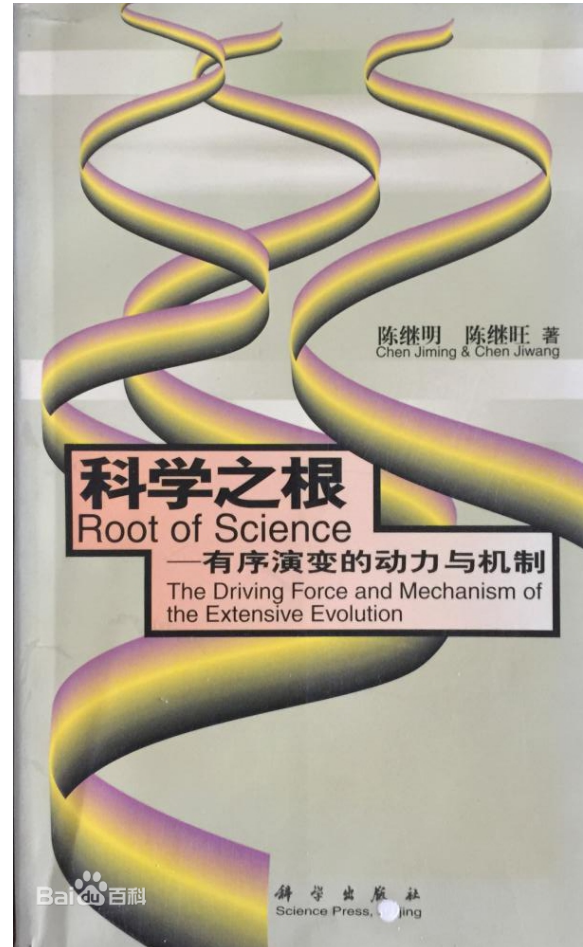

Doctorial Dissertation

## Molecular Evolution of Influenza B Virus HA1 region & Tentative Discussions on Biological Macroscopic Evolution

Chen Jiming

Superadviser: Prof. Guo Yuanji  
Institute of Virology  
Chinese Academy of Preventive Medicine  
Yingxinjie 100#, Xuanwuqu  
Beijing 100052, P. R. China

May, 2001

Afterward we spent around 20 years optimizing and simplifying it

## Five stages of the development of the CBET

1993—2000

Establishment of the mathematical and thermodynamic bases of this theory originally targeting the evolution of the universe

2001—2016

Investigation of the evolution of multiple species of viruses and application of this theory to the evolution on the Earth

2016—2018

Employment of the concept of carbon-based entity and the simple expressions of the second law of thermodynamics

2019—2020

Elucidation of the mechanisms how low-hierarchy CBEs evolved to high-hierarchy CBEs in general

2020—2021

Elucidation of the mechanisms how low-hierarchy CBEs evolved to high-hierarchy CBEs step by step

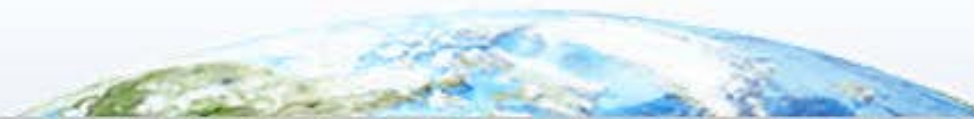

# Aims of the CBET

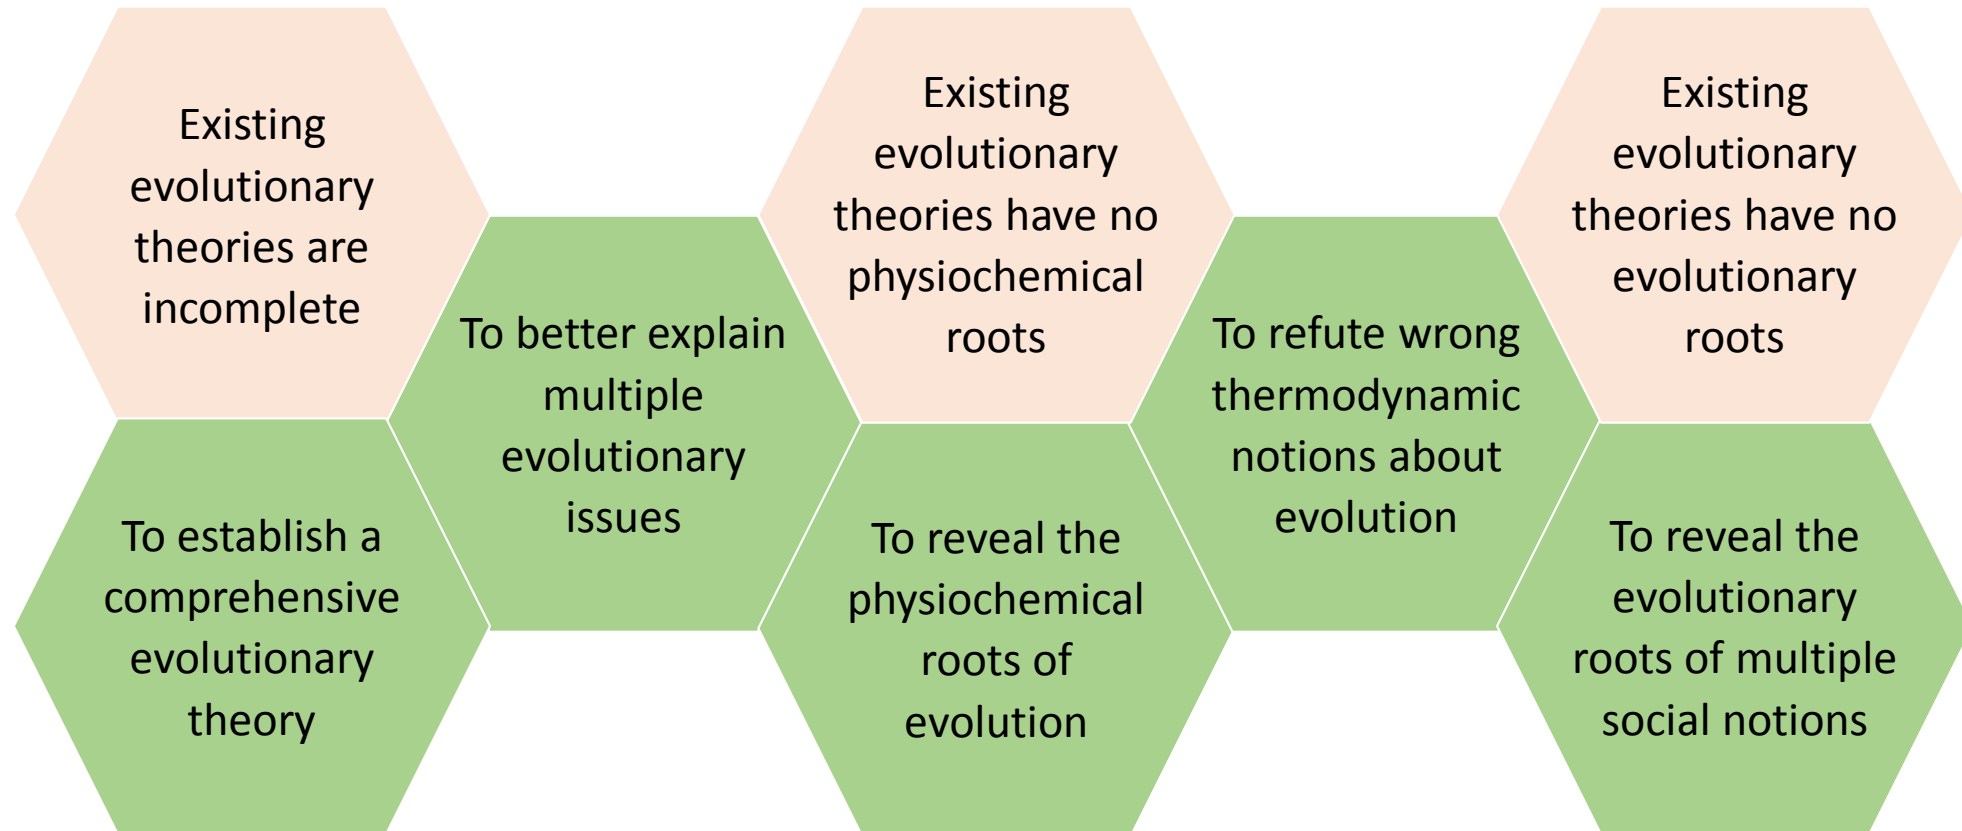

# How to achieve these aims: Multidisciplinary integration

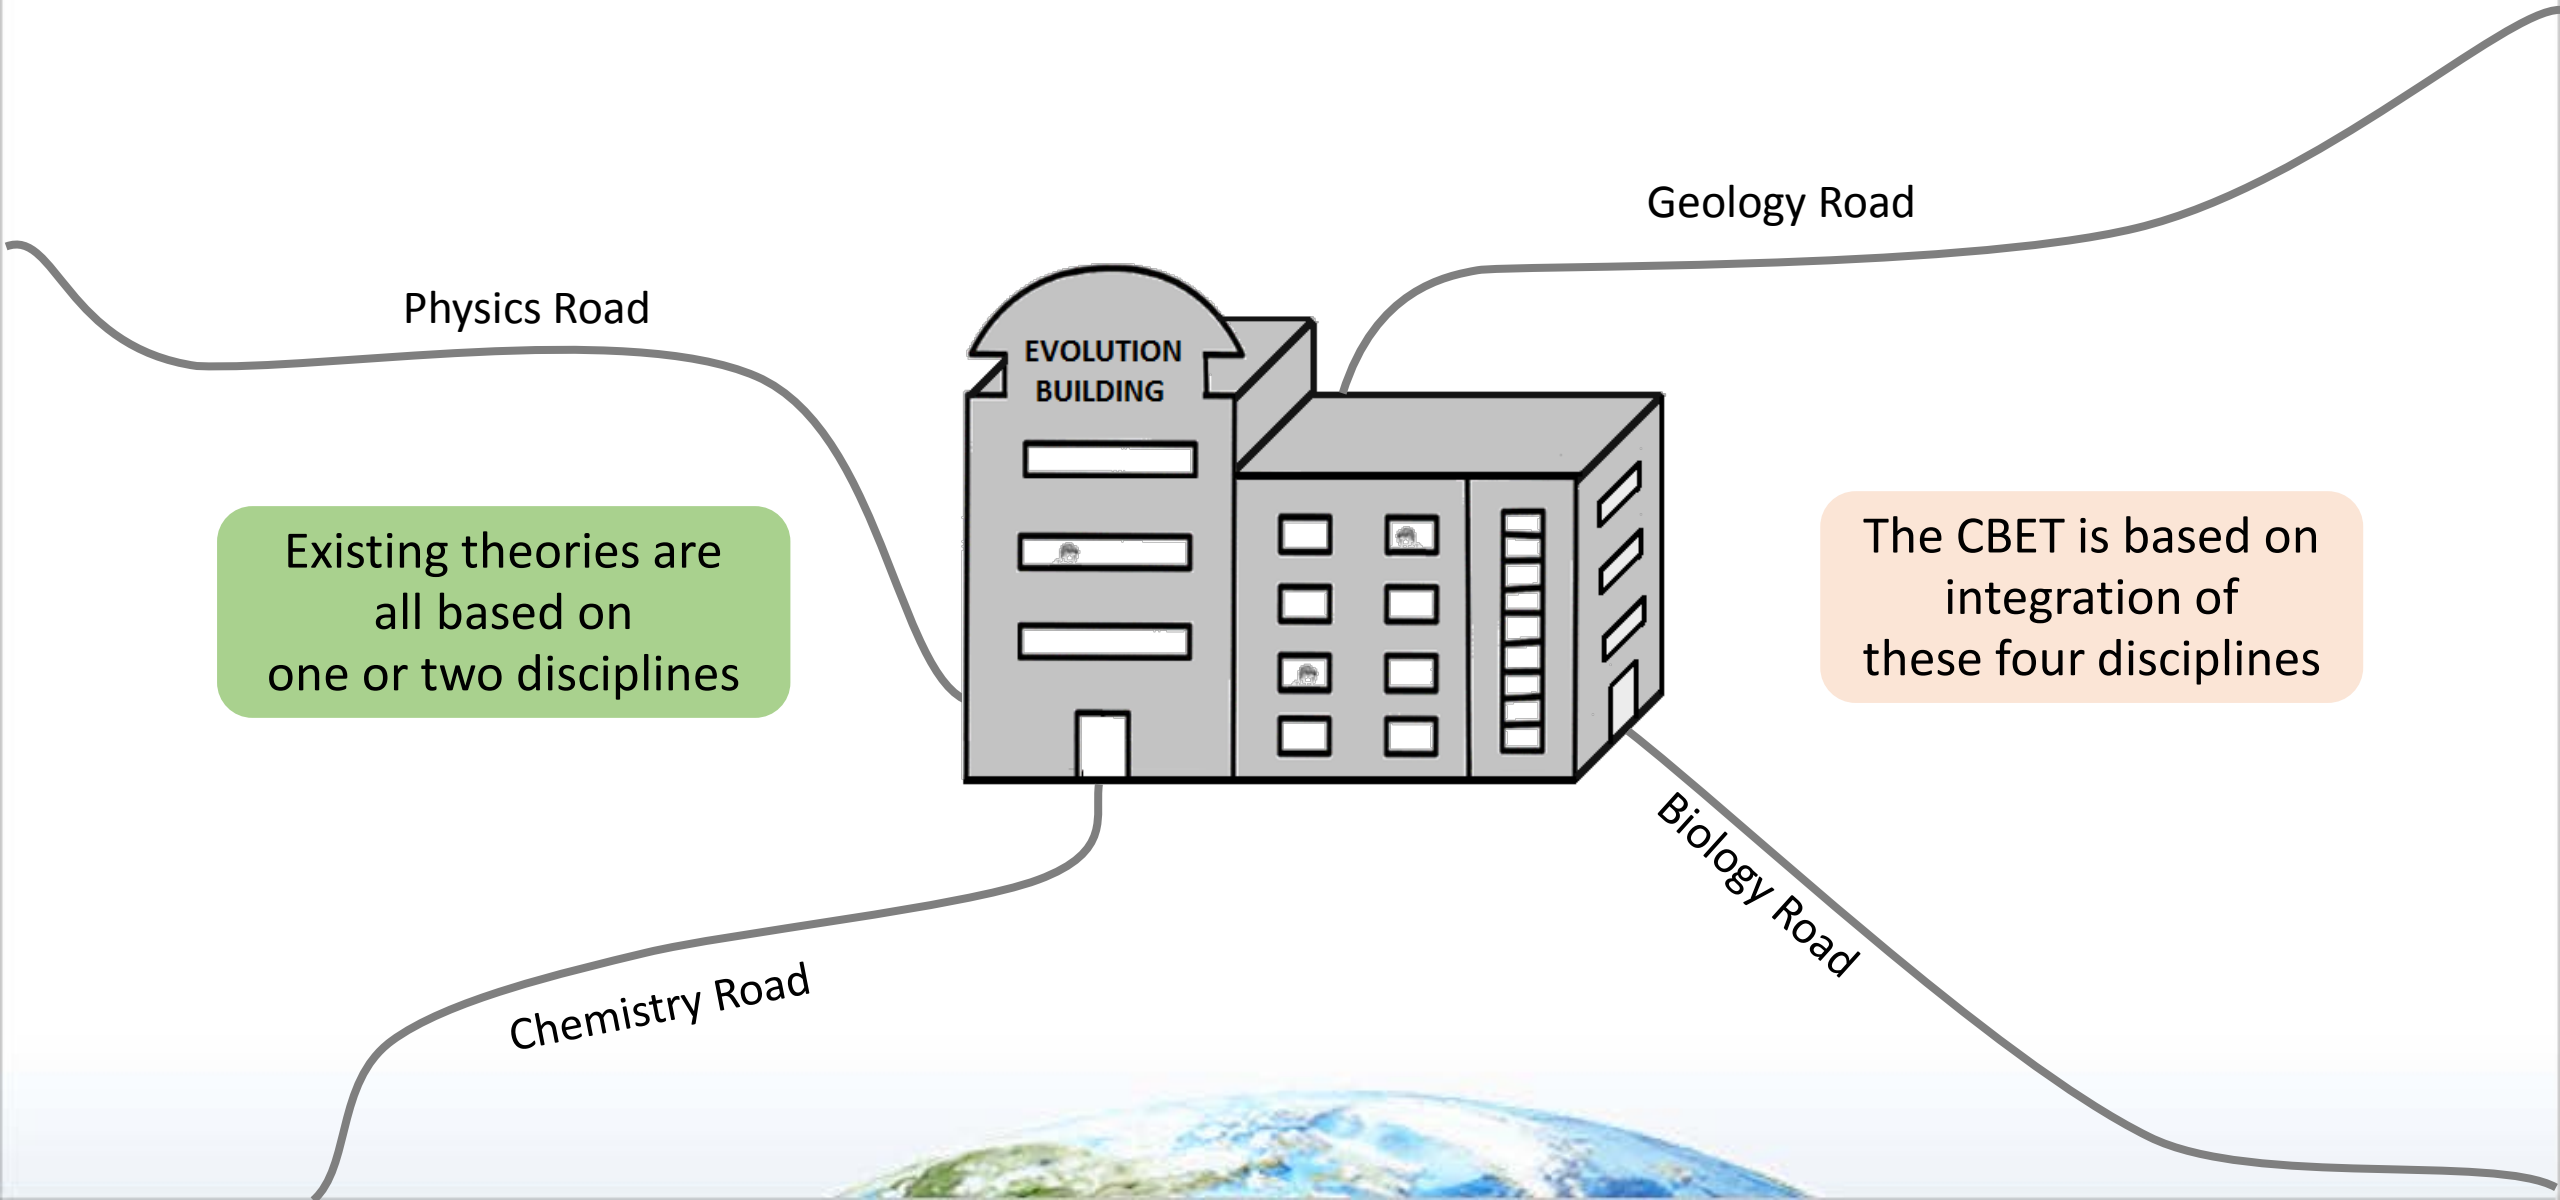

# Advantages of the multidisciplinary integration

| Discipline | Non-replaceable function for evolution    |
|------------|-------------------------------------------|
| Geology    | Provides the environment                  |
| Physics    | Provides the driving force                |
| Chemistry  | Provides the molecular mechanisms         |
| Biology    | Provides the structures and genetic basis |

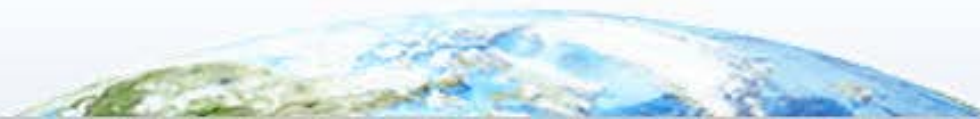

- 1 History & background of the CBET
- 2 The primary driving force of evolution**
- 3 The mechanisms of evolution
- 4 Reliability & significance of the CBET
- 5 Questions & answers
- 6 Generalization of the CBET





# The leading actor in the CBET is CBEs

**CBEs = carbon-based entities**

**= entities chemically containing carbon atoms**

such as carbon dioxide, methane, amino acids, nucleotide, glucose, proteins, nucleic acids, lipids, organisms including bacteria, fungi, plants, animals, humans

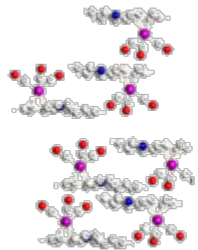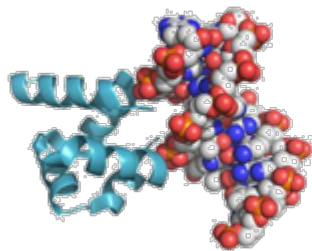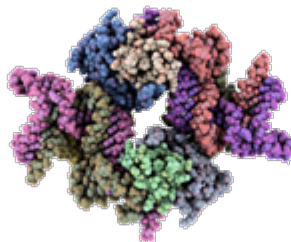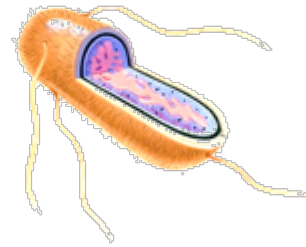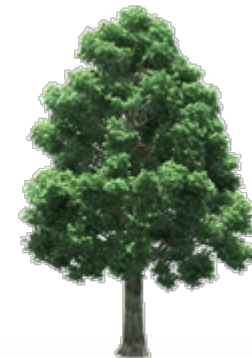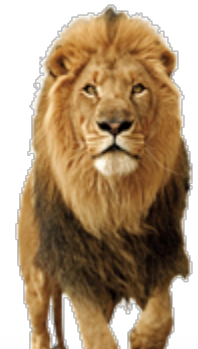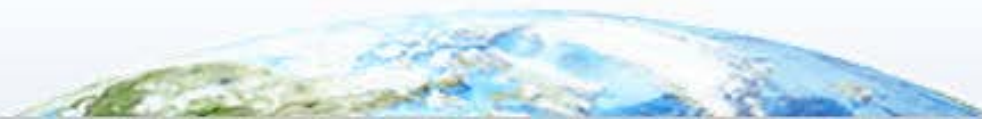

# Advantage of CBEs in discussing evolutionary issues

- Evolution of CBEs covers life origin and life evolution
- CBEs are more readable, concrete, and specific than quanta, molecules, microscopic particles, matter, and systems
- CBEs are more inclusive than organic compounds, carbohydrates, organisms, genes, and populations



# Carbon atoms are prone to share electrons with various atoms and form many flexible CBEs

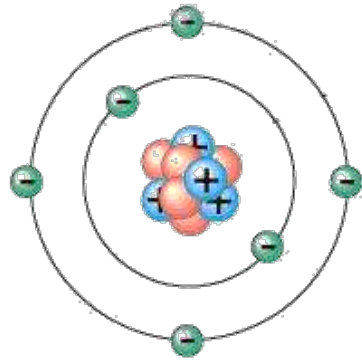

Carbon atom

I am a CBE  
I can change a lot  
I can be very long  
I can be very wonderful  
Because I am good at sharing  
Because I am flexible

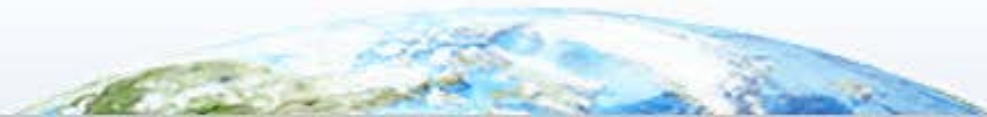

# CBEs can form multiple hierarchies

| Hierarchy | Definition                              | Examples                                      |
|-----------|-----------------------------------------|-----------------------------------------------|
| H1-CBEs   | Small molecules containing carbon atoms | Carbon dioxide, methane, and ethanol          |
| H2-CBEs   | Larger small organic organic molecules  | Amino acids, nucleotides, and glucose         |
| H3-CBEs   | Organic macromolecules                  | Proteins, nucleic acids, and lipids           |
| H4-CBEs   | Unicellular organisms                   | Archaea, bacteria, and protozoa               |
| H5-CBEs   | Multicellular organisms                 | Grasses, trees, fishes, birds, and humans     |
| H6-CBEs   | Animal societies                        | Ant societies, bee societies, human societies |

There are no clear lines separating these hierarchies. For example, some peptides are between H2-CBEs and H3-CBEs

Higher-hierarchy CBEs (**HHCBEs**) and lower-hierarchy CBEs (**LHCBEs**) are defined through comparing their hierarchies

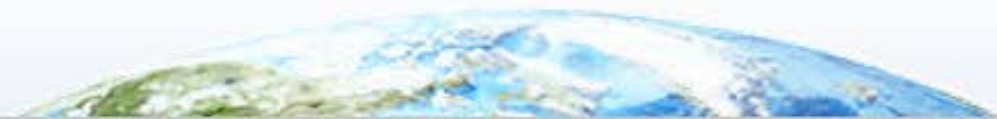

## In geology

**Many environments on the Earth are warm and have water and stimuli  
(e.g. lightning, radiation, hot streams)**

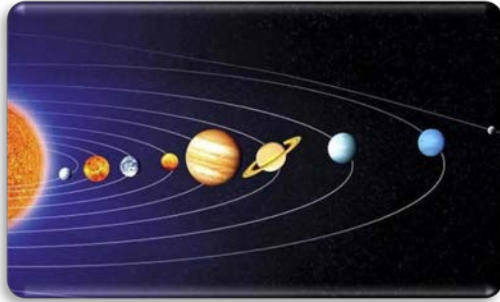

**Due to the sunlight**

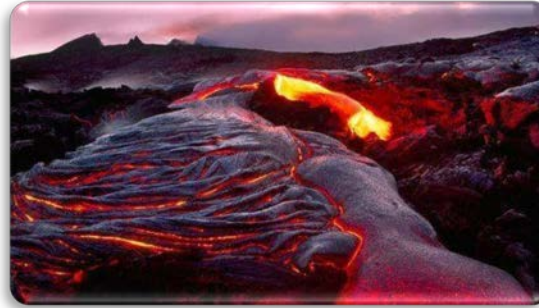

**Due to geotherm**

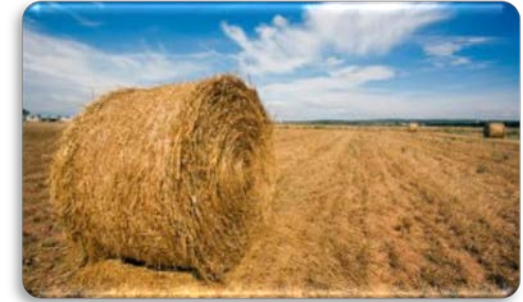

**Due to biochemical energy**

**The Earth has much water and the atmosphere**

which make warm environments more temperate, more widespread and last longer through winds, rains, water flows, and evaporation



# In physics: Two contrary tendencies on the Earth

## As per the second law of thermodynamics

Heat can spontaneously flow from a hotter body to a colder body,  
and cannot spontaneously flow from a colder body to a hotter body

### The heat absorbing tendency

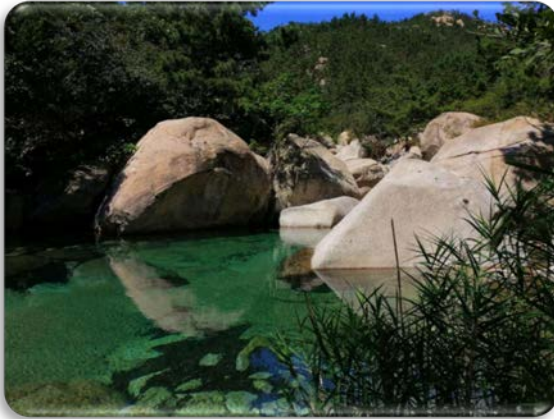

Many molecules in stones under the  
sunshine spontaneously have the  
tendency to absorb heat  
to move more rapidly

### The heat releasing tendency

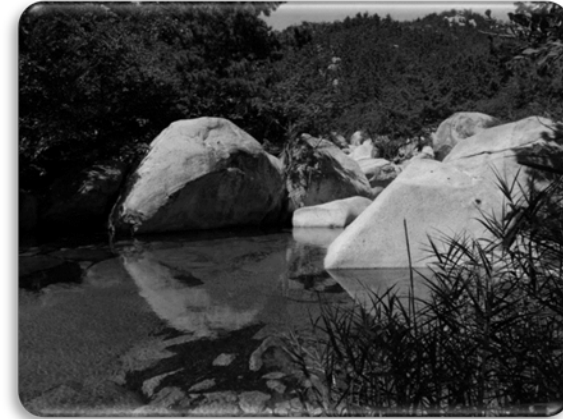

Many molecules in stones in the night  
spontaneously have the tendency  
to release heat  
to move less rapidly

Wait a moment, please. The second law of thermodynamics is so stated: the entropy of an isolated system never decreases over time

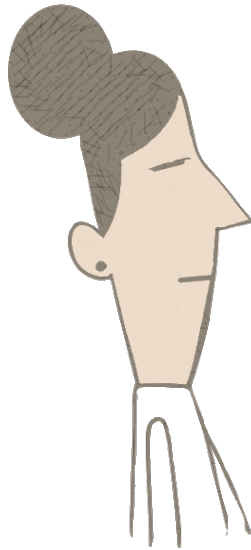

This law has multiple correct expressions. The entropy-based expression you mentioned is difficult and not directly applicable to evolution.

The heat-based expression employed by the CBET is simple and directly applicable to evolution

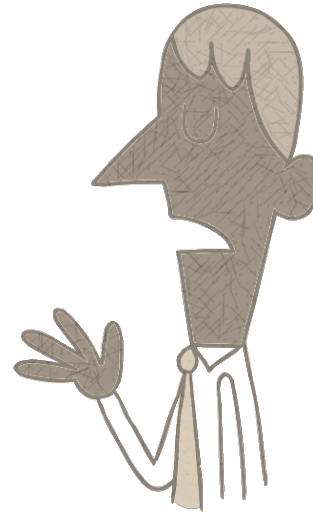



Is this assumption wrong?

It is widely assumed that biological evolution is contradictory to the second law of thermodynamics

Yes. Many people have been misled by the wrong notion that biological order is equal to thermodynamic order, and they hence have this wrong assumption

We shall discuss this issue soon in this PPT

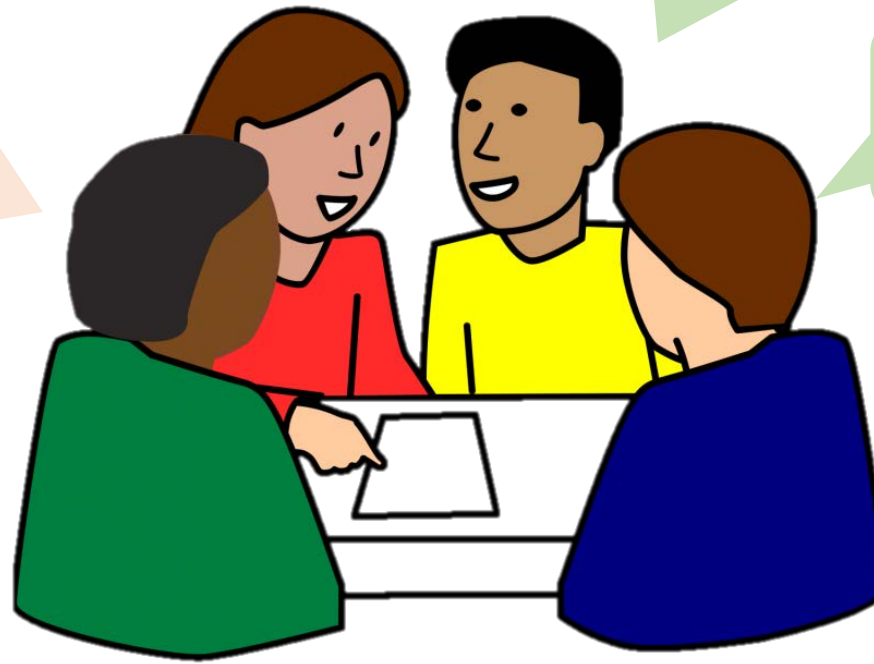



# In chemistry: Two contrary tendencies on the Earth

## **The organic synthesis tendency**

Carbon atoms are prone to form covalent bonds, after absorbing heat and moving relatively rapidly as per the second law of thermodynamics

## **The organic decomposition tendency**

Organic molecules are prone to destroy their relatively fragile bonds to release heat to the environment, after they have been activated by some relatively strong stimuli (e.g. fires)

**Organic molecules can be decomposed only after they have been synthesized**

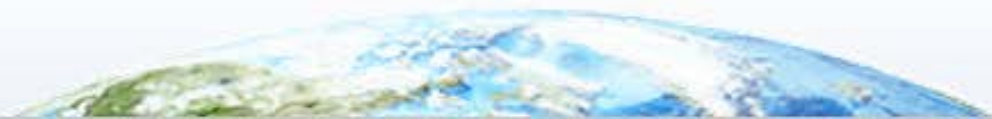

# The organic decomposition tendency

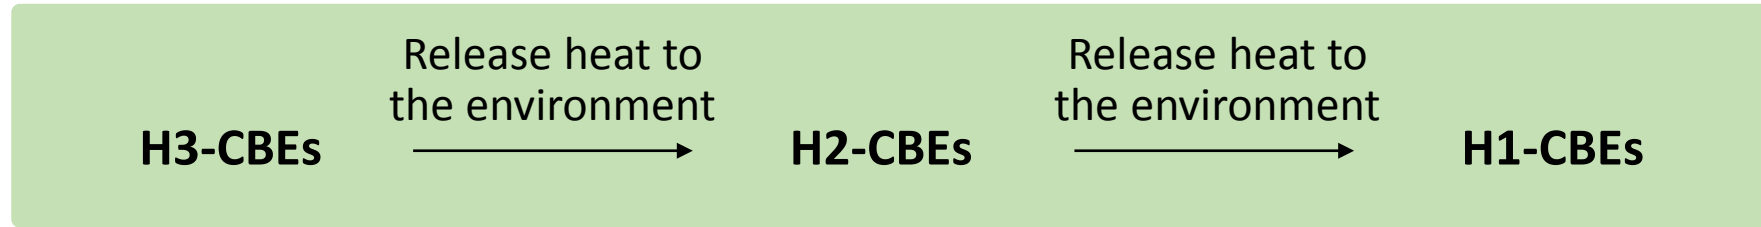

H2-CBEs (e.g. glucose, amino acids) and H3-CBEs (e.g. lipids, proteins) have the tendency to decompose to release heat to the environment after they have been activated by relatively strong stimuli (e.g. fires)

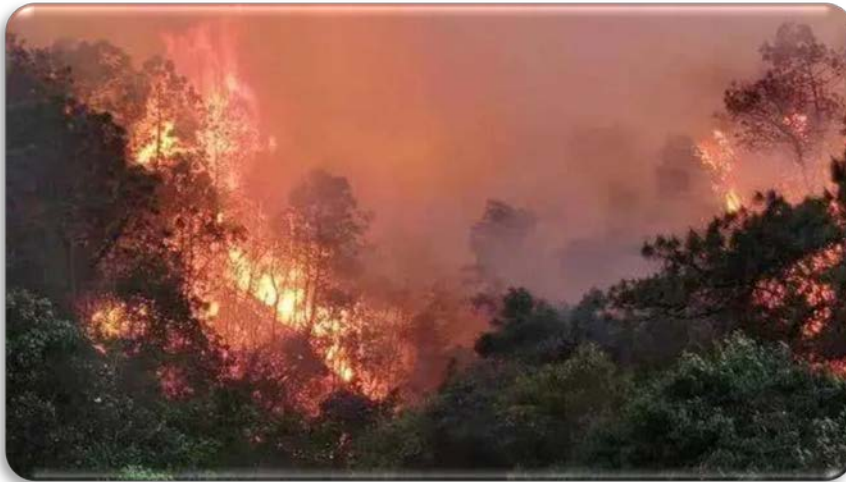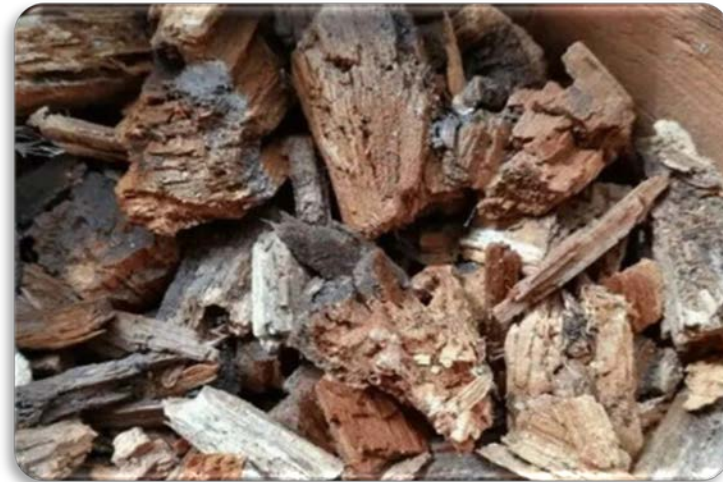

# The organic synthesis tendency

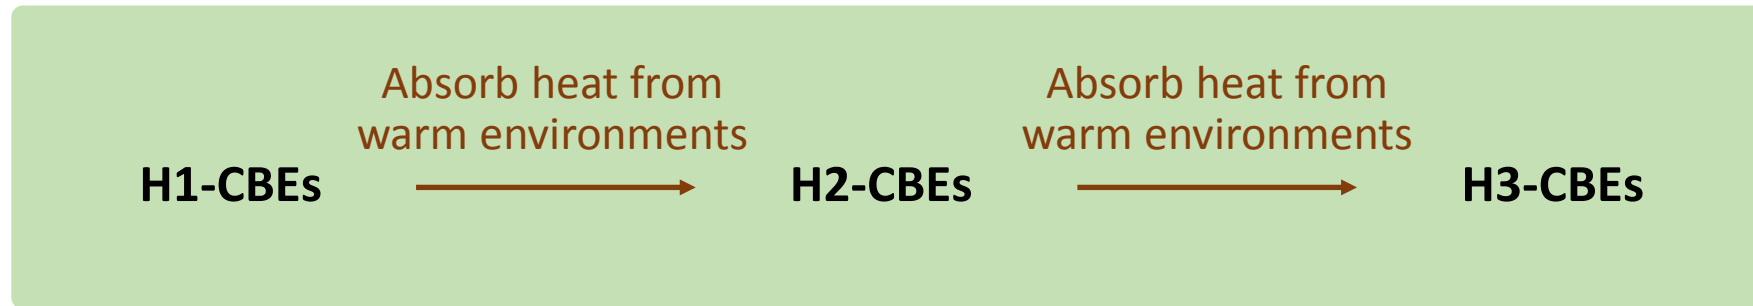

H1-CBEs (e.g.  $\text{CO}_2$ ) along with some other molecules (e.g.  $\text{H}_2\text{O}$ ) have the tendency to absorb heat from warm environments to move relatively rapidly and form H2-CBEs (e.g. glucose)

H2-CBEs (e.g. amino acids) along with some other molecules have the tendency to absorb heat from warm environments to move relatively rapidly and form H3-CBEs (e.g. proteins)



# Temperature and water are critical for organic syntheses triggered by the organic synthesis tendency

Too low temperature or too high temperate: no organic synthesis tendency

Water makes environments more temperate, last longer, and more widespread

Water participates in the organic syntheses as an important substrate

Water provides environments for the syntheses

Water flows facilitate molecules to meet each other for the syntheses

Water maintains the structures and functions of many enzymes for the syntheses

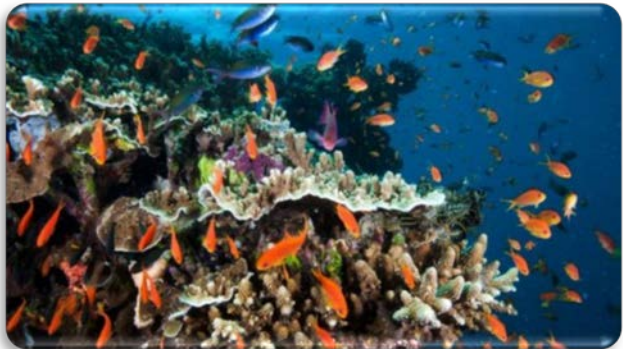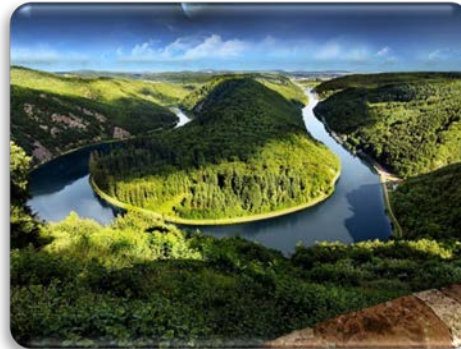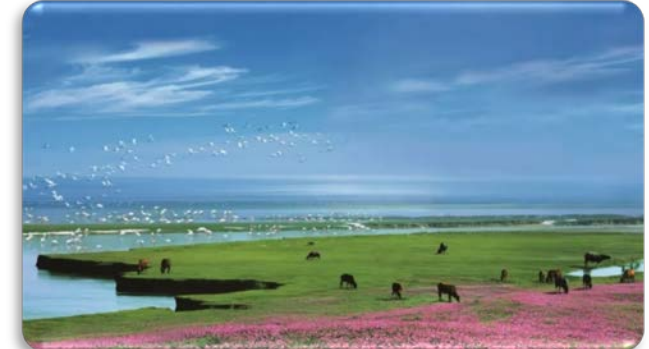

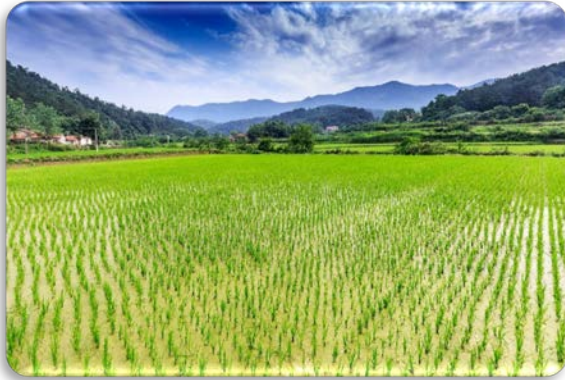

**Warm humid areas**  
**The organic synthesis tendency is obvious**

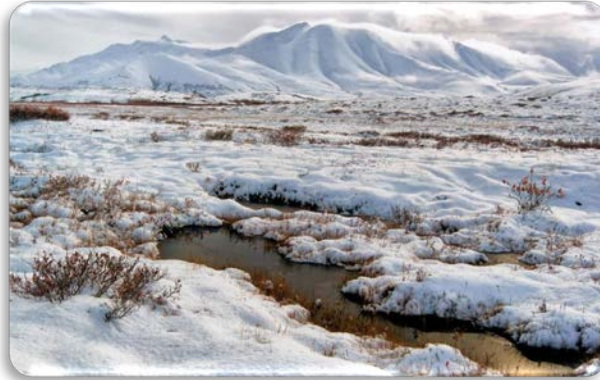

**Cold areas**  
**The organic synthesis tendency is inhibited**

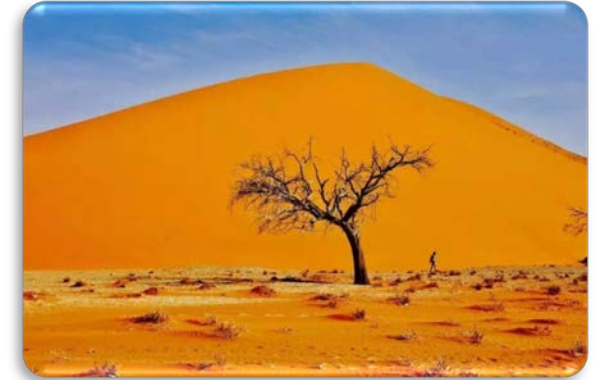

**Tropic arid deserts**  
**The organic synthesis tendency is inhibited**





# The organic synthesis tendency changes with seasons

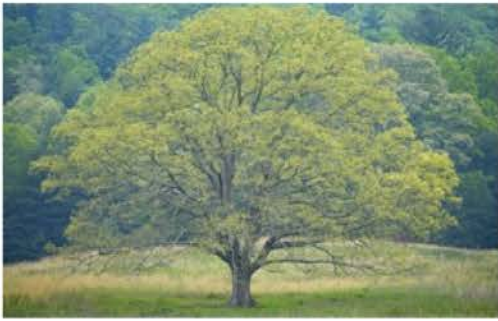

**Spring**

**Organic synthesis  
begins dominating**

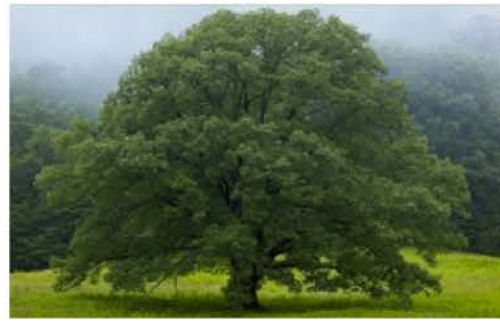

**Summer**

**Organic synthesis  
peaks**

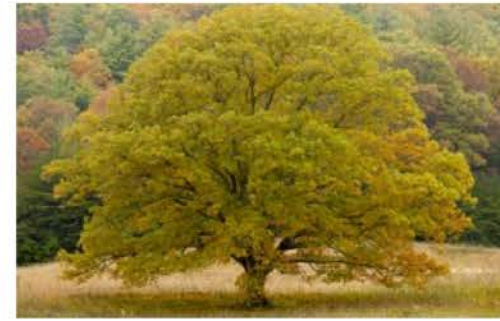

**Autumn**

**Organic synthesis  
subsides**

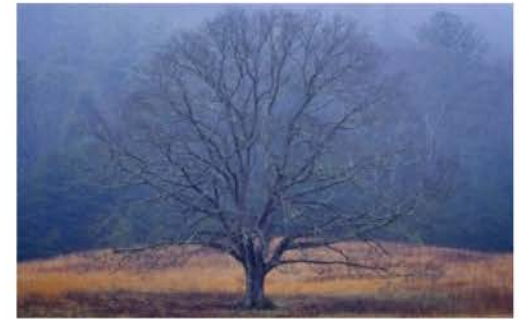

**Winter**

**Organic synthesis is  
inhibited**

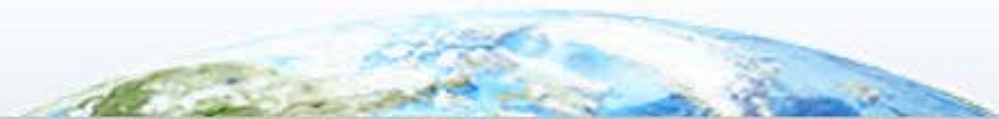

It is nice to use these simple examples to explain the thermodynamic tendencies

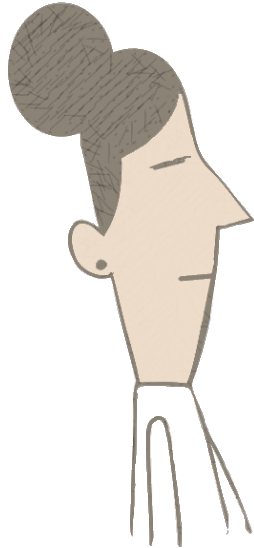

Thank you. We also use examples to explain some complex logics in this article

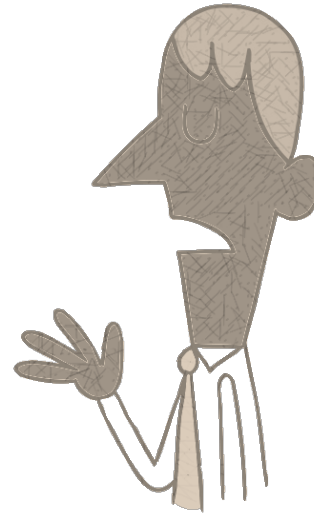

**Without enzymes natural organic syntheses are very slow  
due to relatively high activation energy**

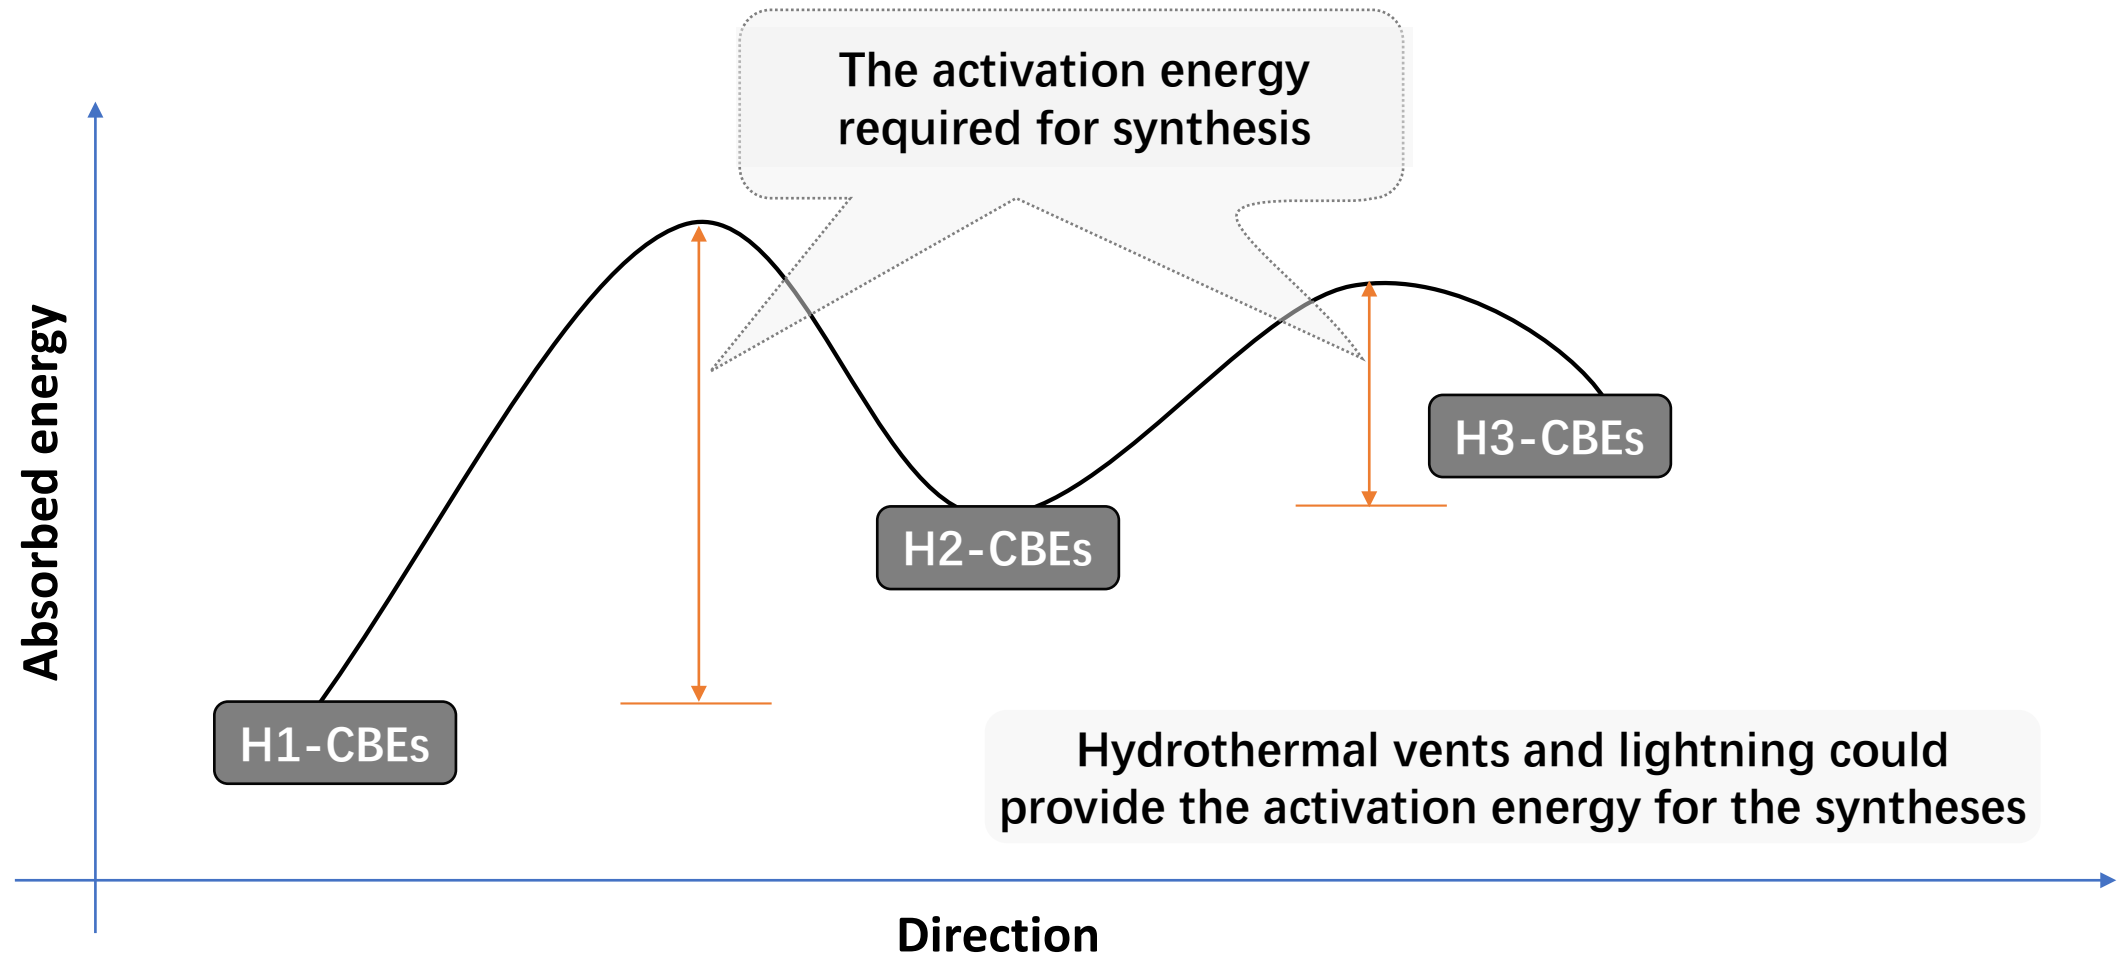



# Organic syntheses can be accelerated with enzymes

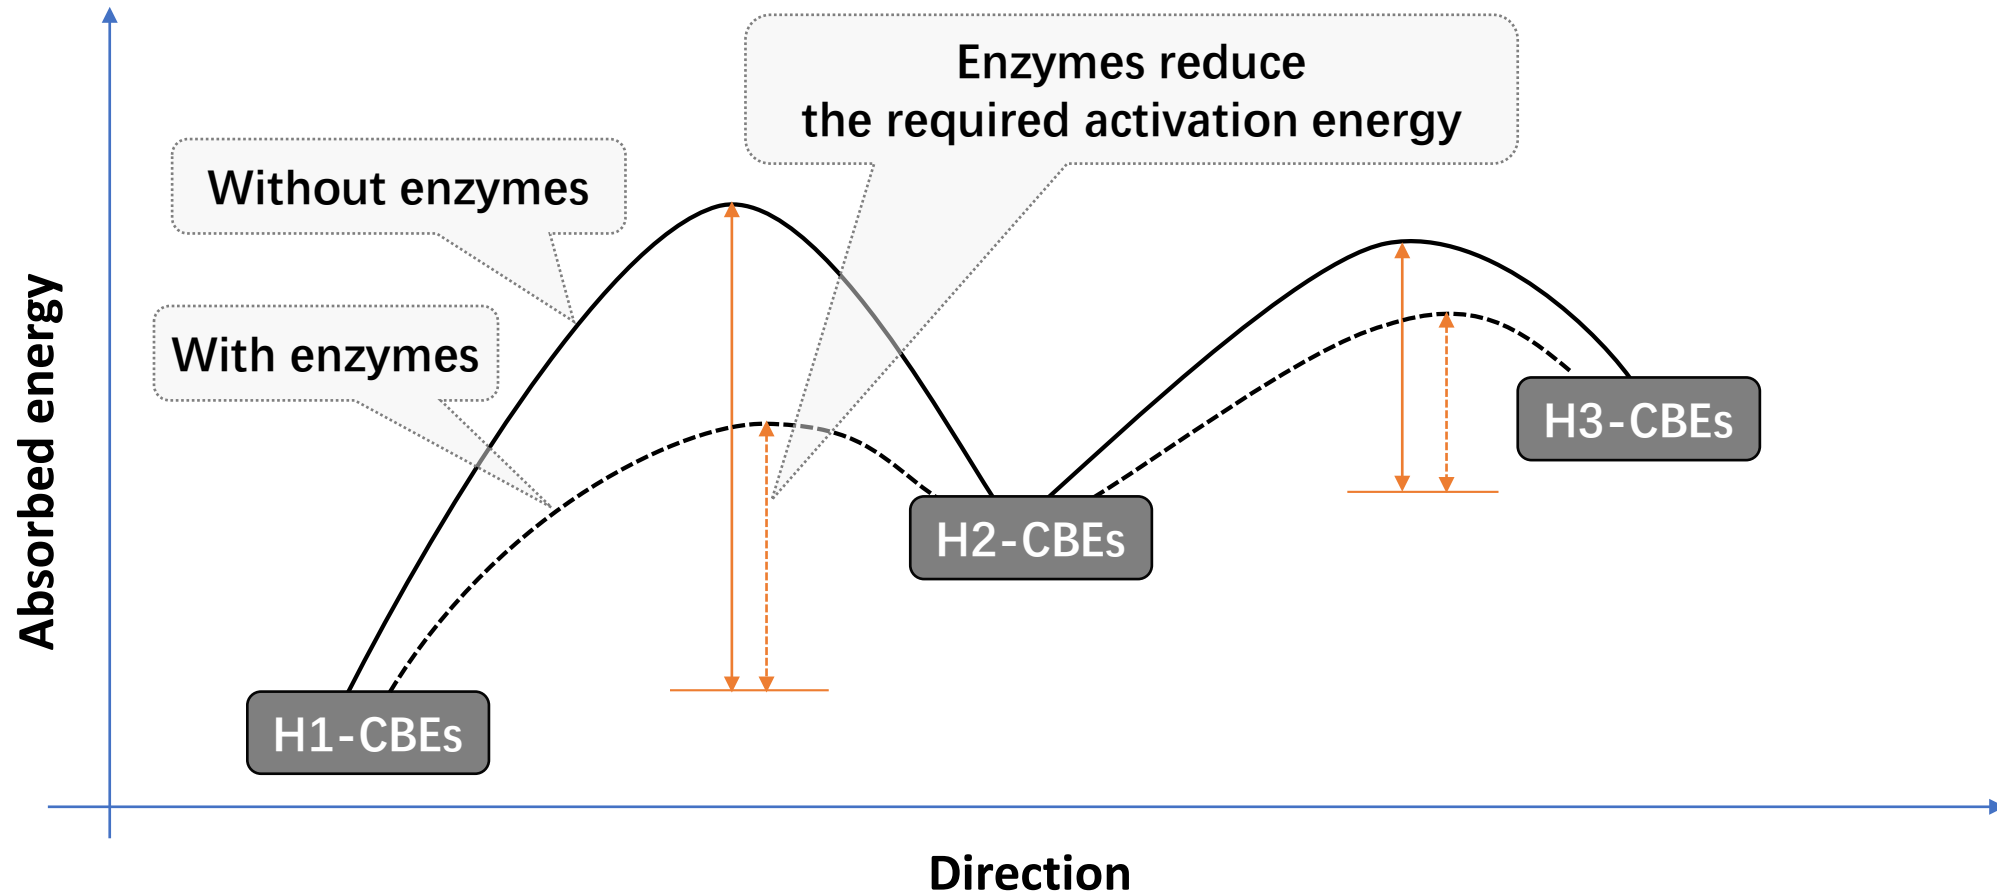

**Likewise, natural organic decompositions are very slow in cold environments without enzymes and relatively strong stimuli**

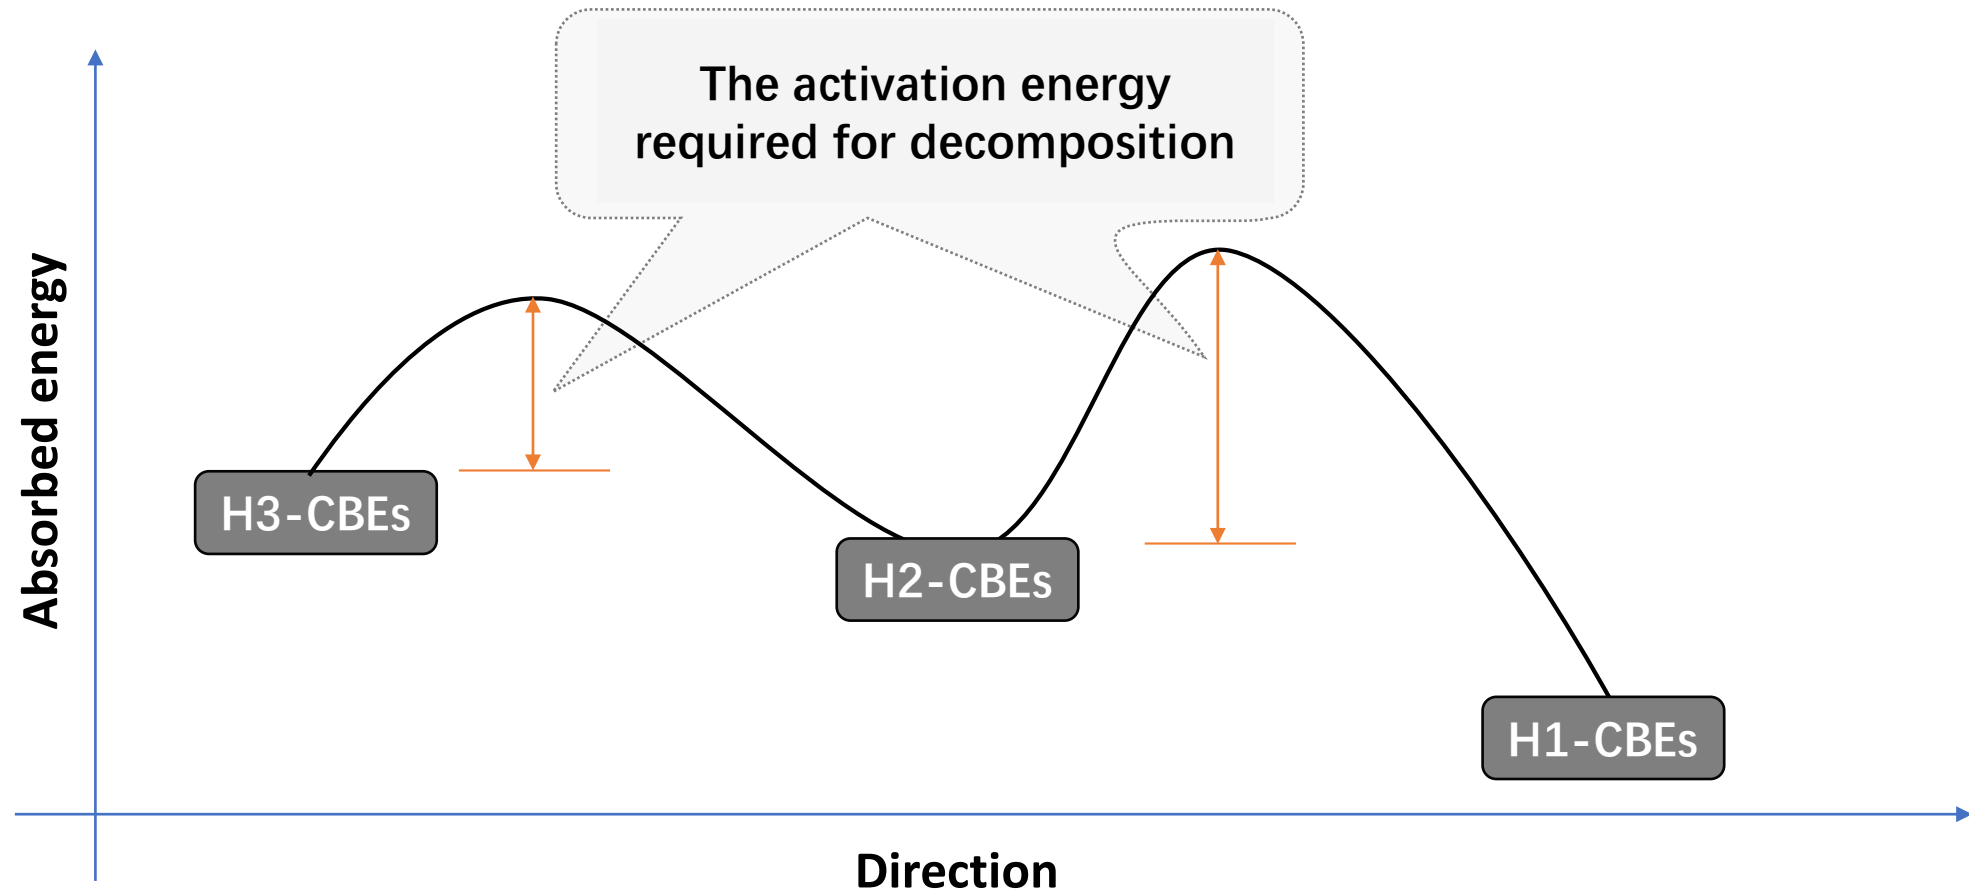

**Cold environments without enzymes and relatively strong stimuli can inhibit organic decomposition**

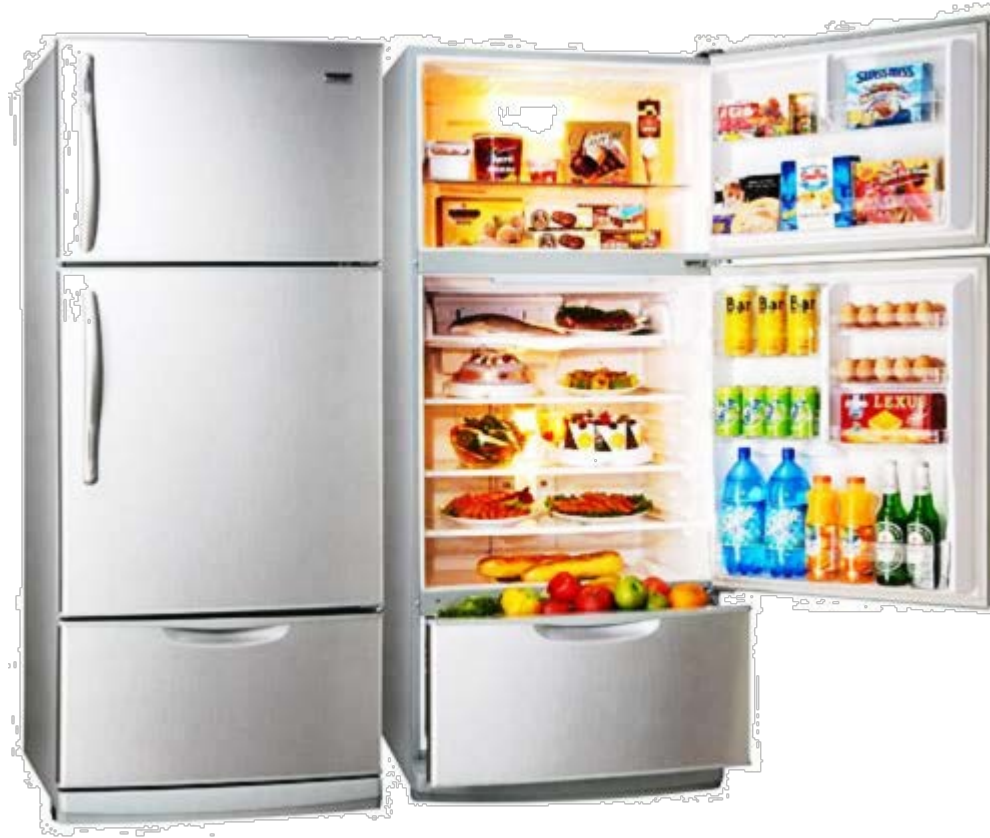

**This principle is widely used to preserve food**

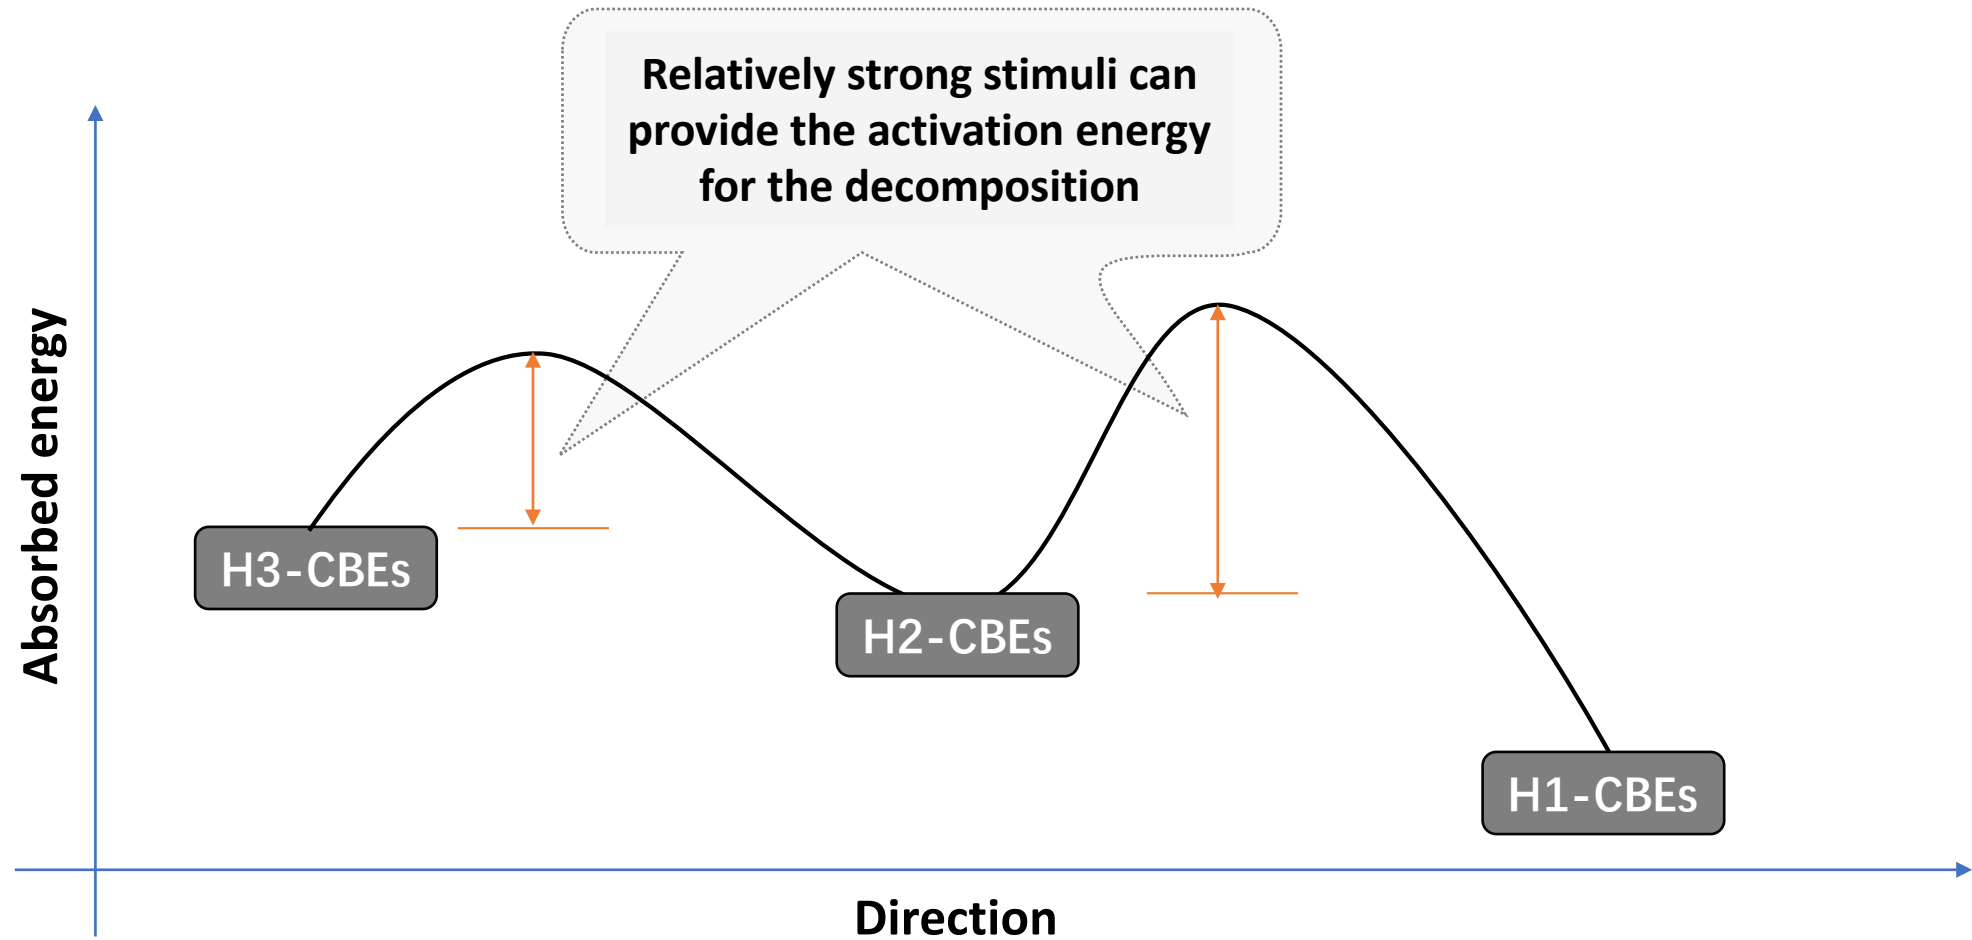

## Organic decomposition reactions can be accelerated with enzymes

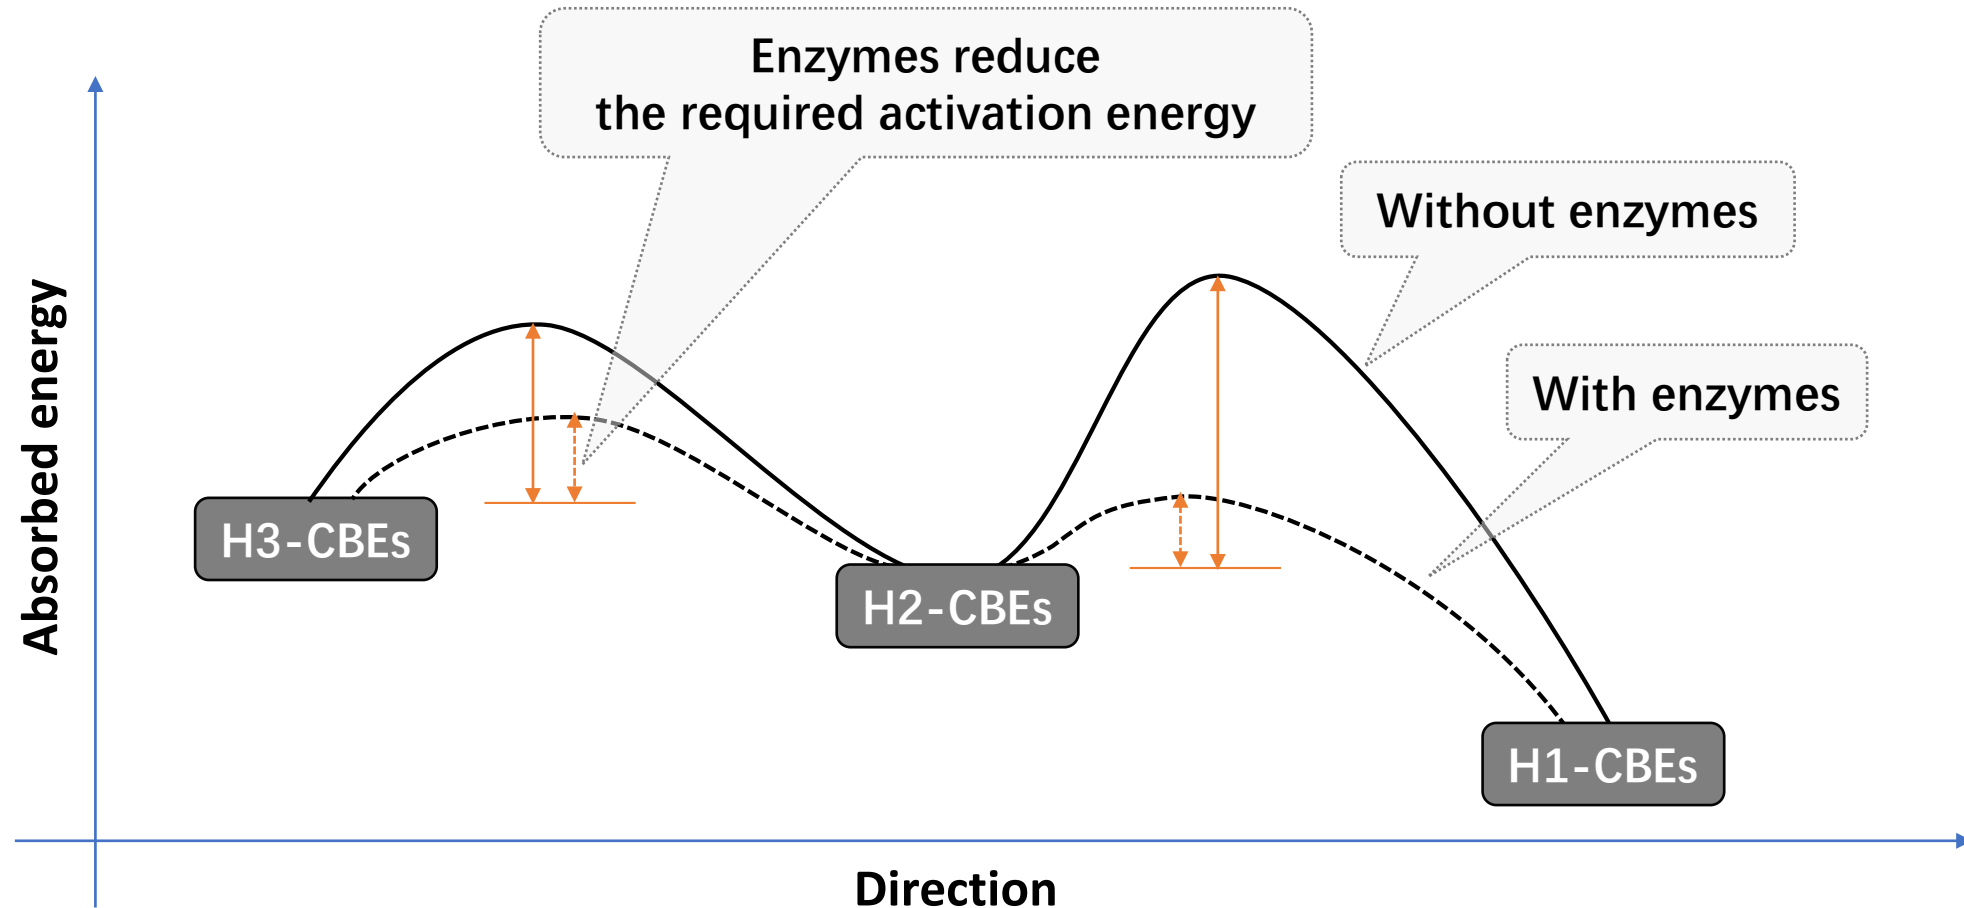

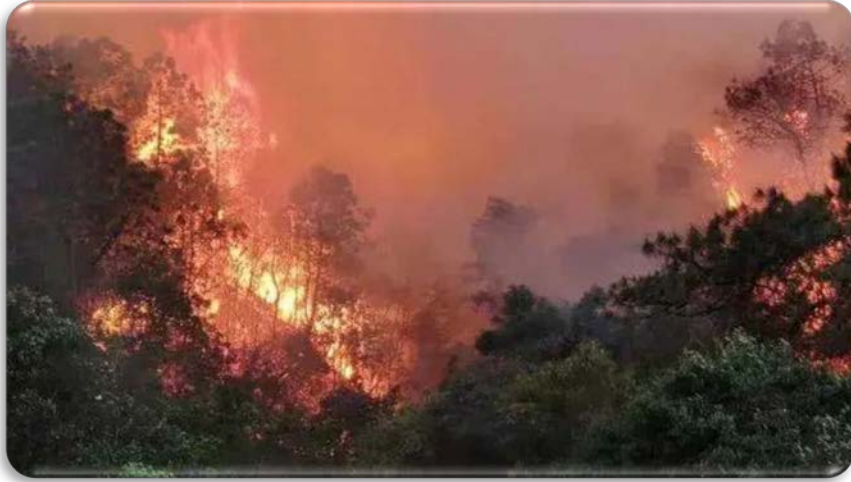

**Without enzymes it requires strong stimuli to decompose organic molecules**

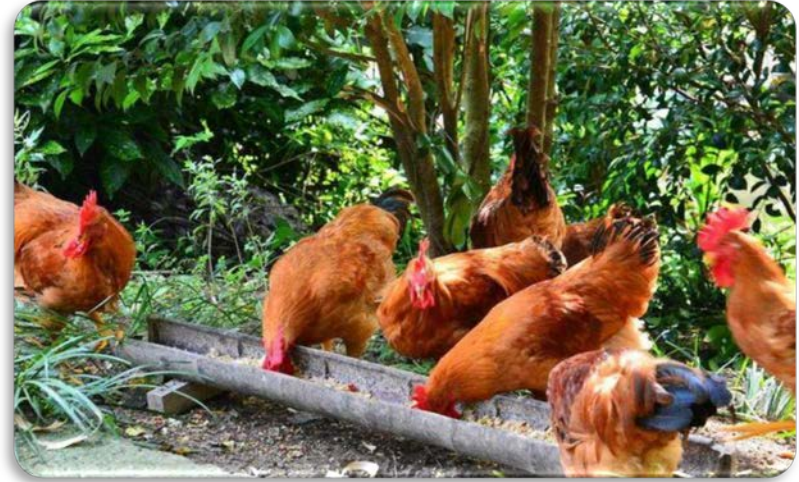

**Chickens use many enzymes to gently decompose organic molecules in the feed**

# Enzymes cannot change the reaction directions which are determined by thermodynamics

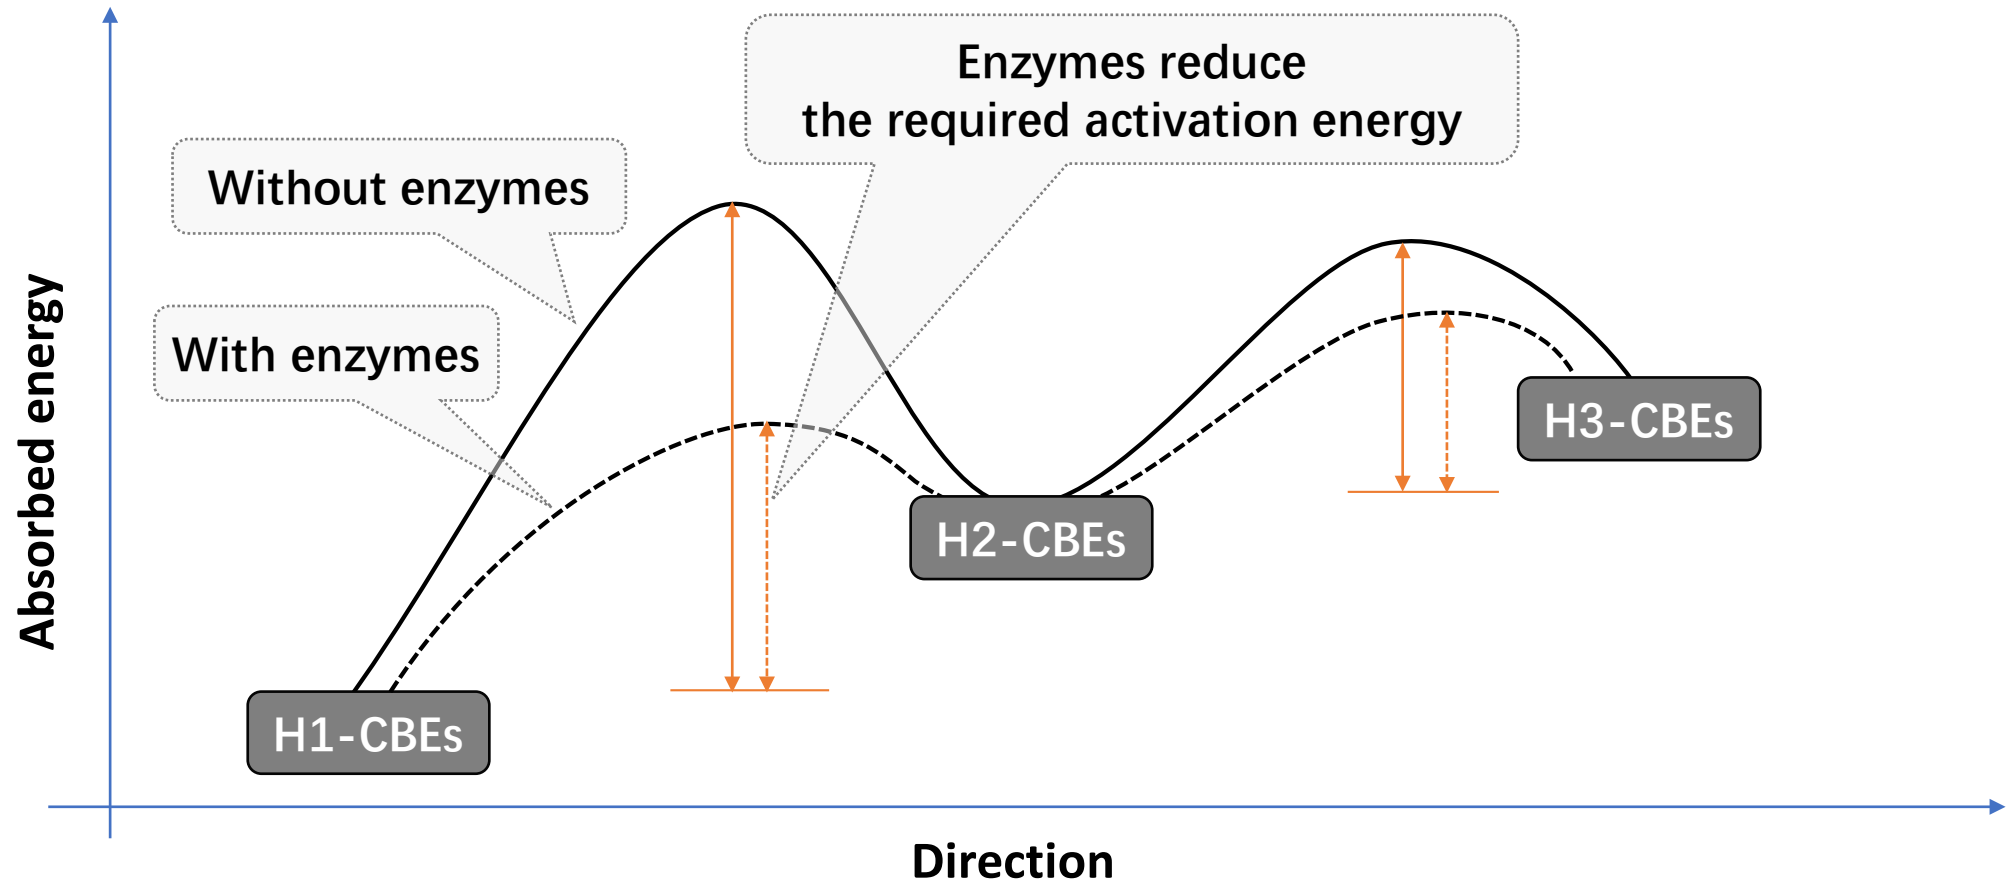

Each enzyme can only facilitate CERTAIN reactions  
(The specificity of enzymes)

# The early Earth was far from the balance regarding the two contrary tendencies

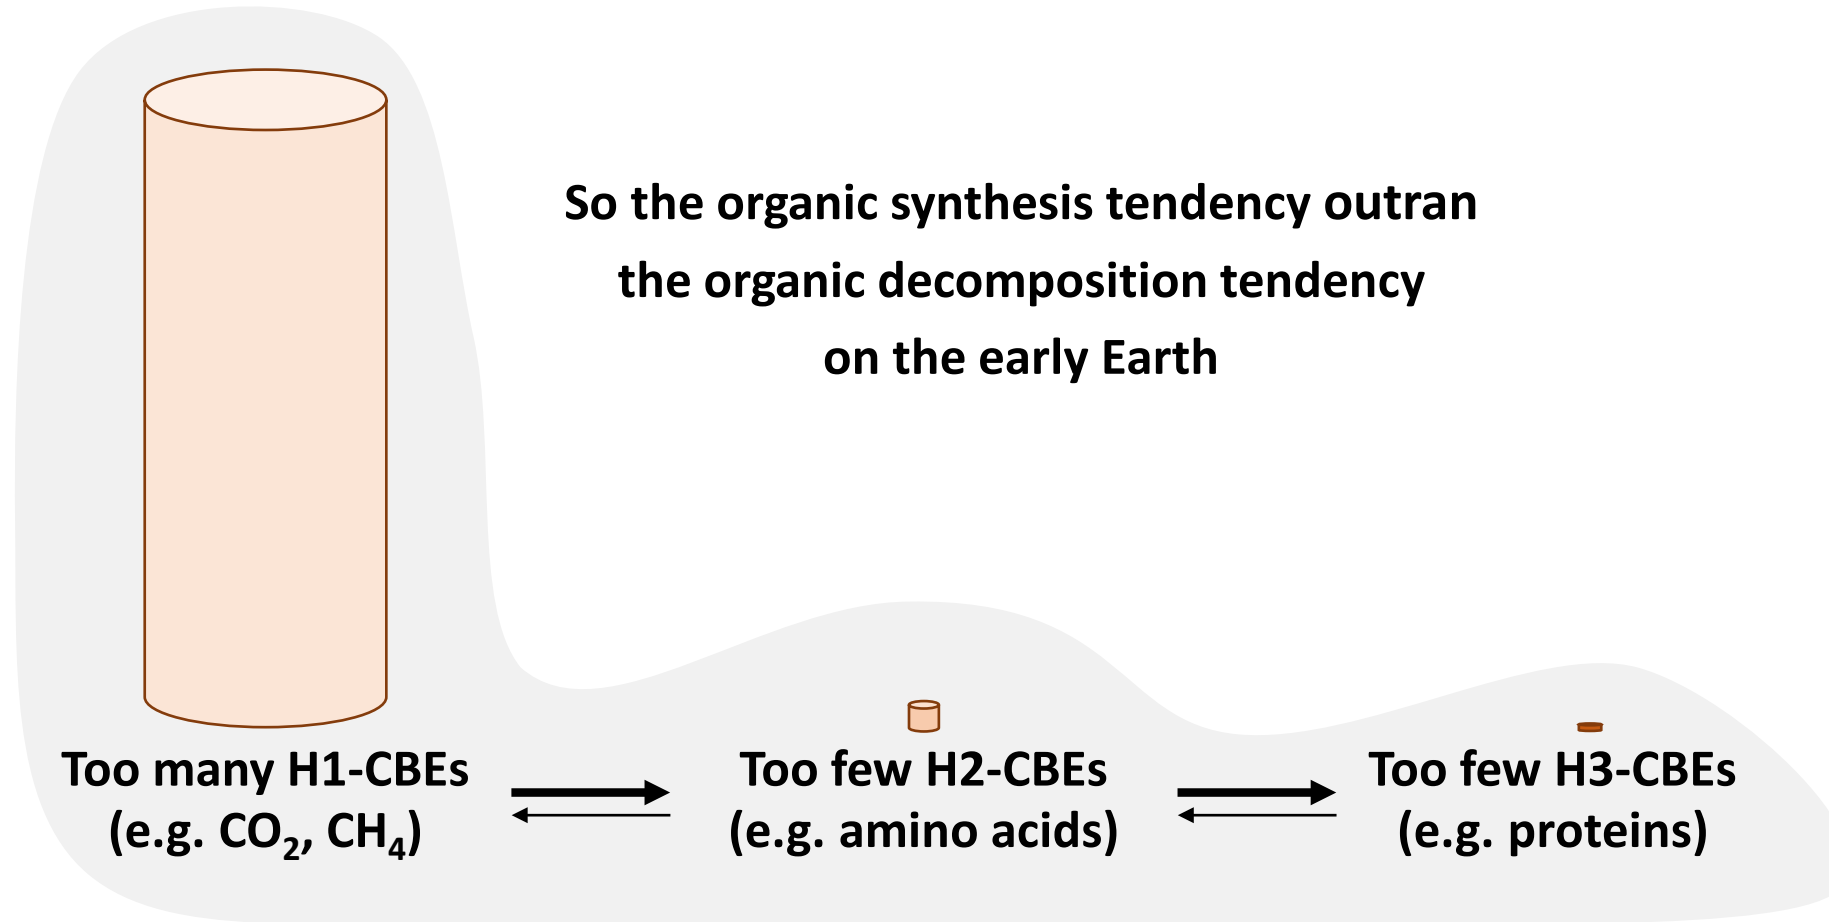



**Later, the two contrary tendencies on the Earth  
could maintain relative balance**

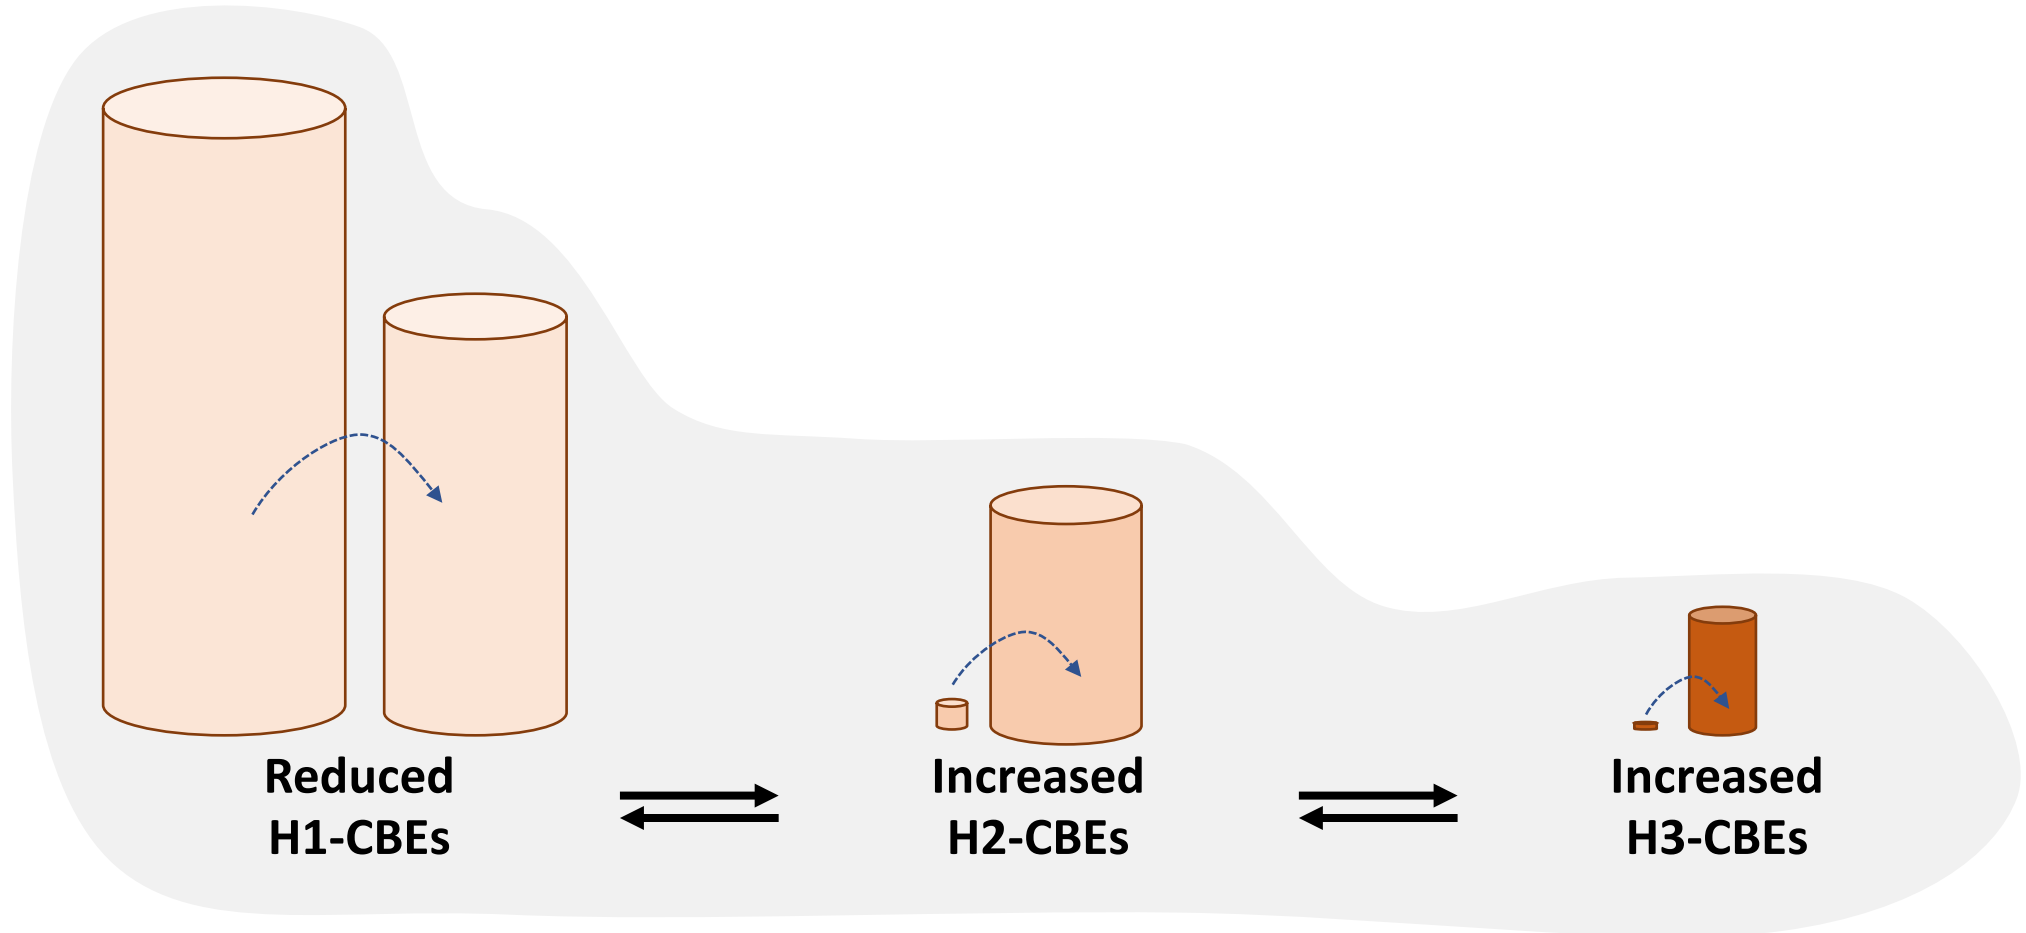

**Some naturally synthesized H3-CBEs are enzymes  
which can accelerate some organic synthesis or decomposition reactions  
triggered by the above tendencies**

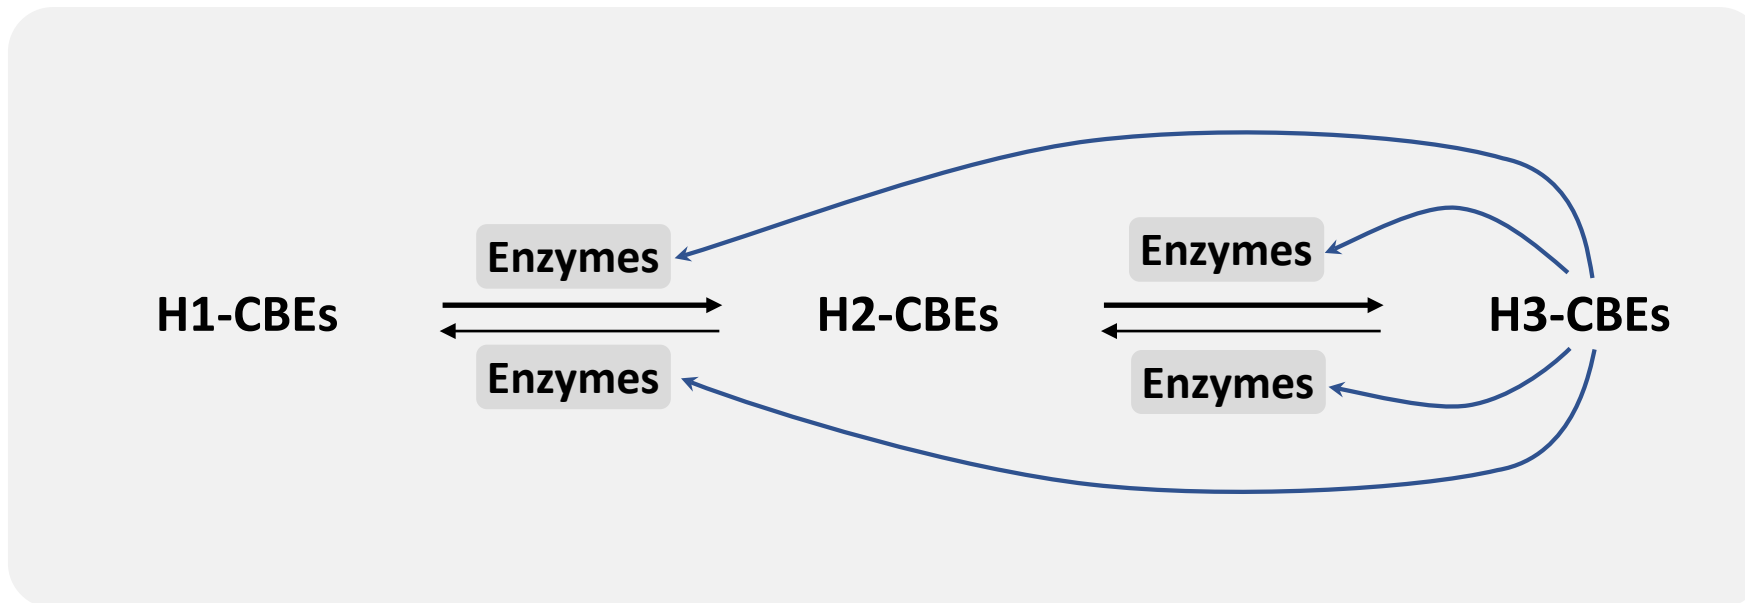

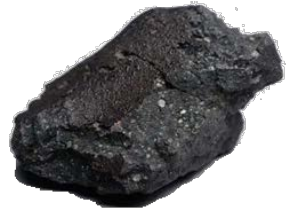

The Murchison meteorite that fell to the Earth in 1969 contains various organic molecules at relatively high concentrations

**This meteorite suggests that billions of tons of organic molecules could be synthesized before life origin with the aids of various enzymes**

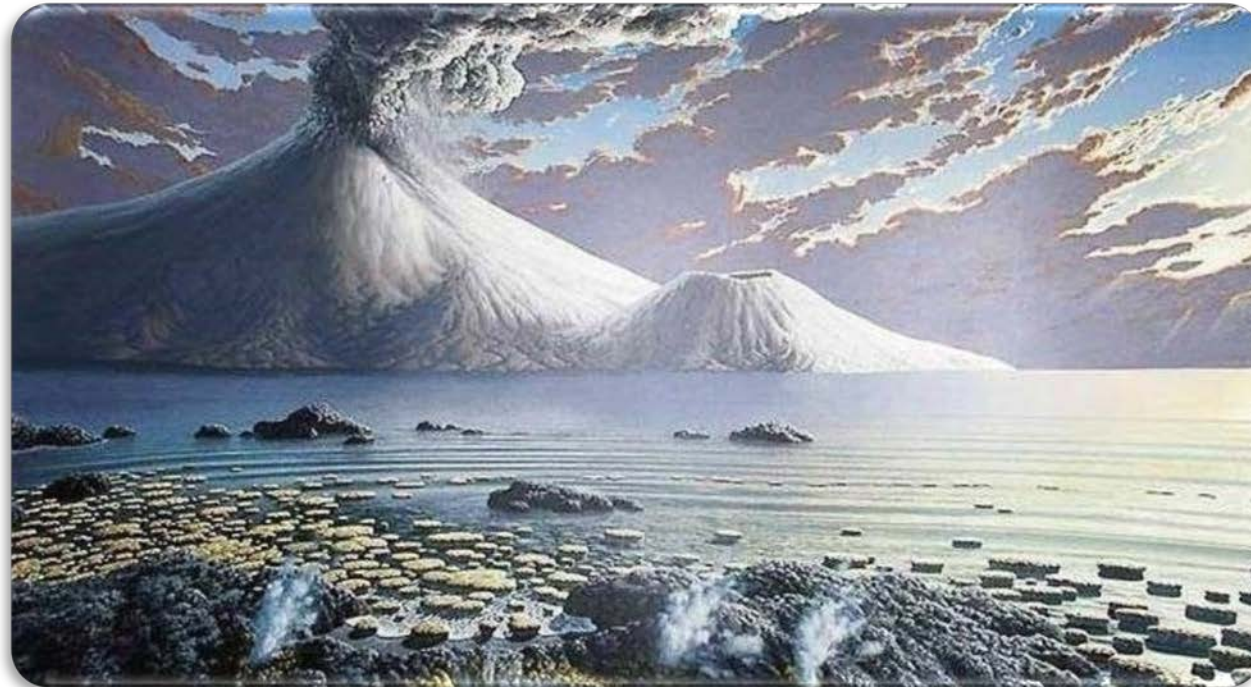

# Various H2-CBEs and H3-CBEs spontaneously formed vast structures on the Earth

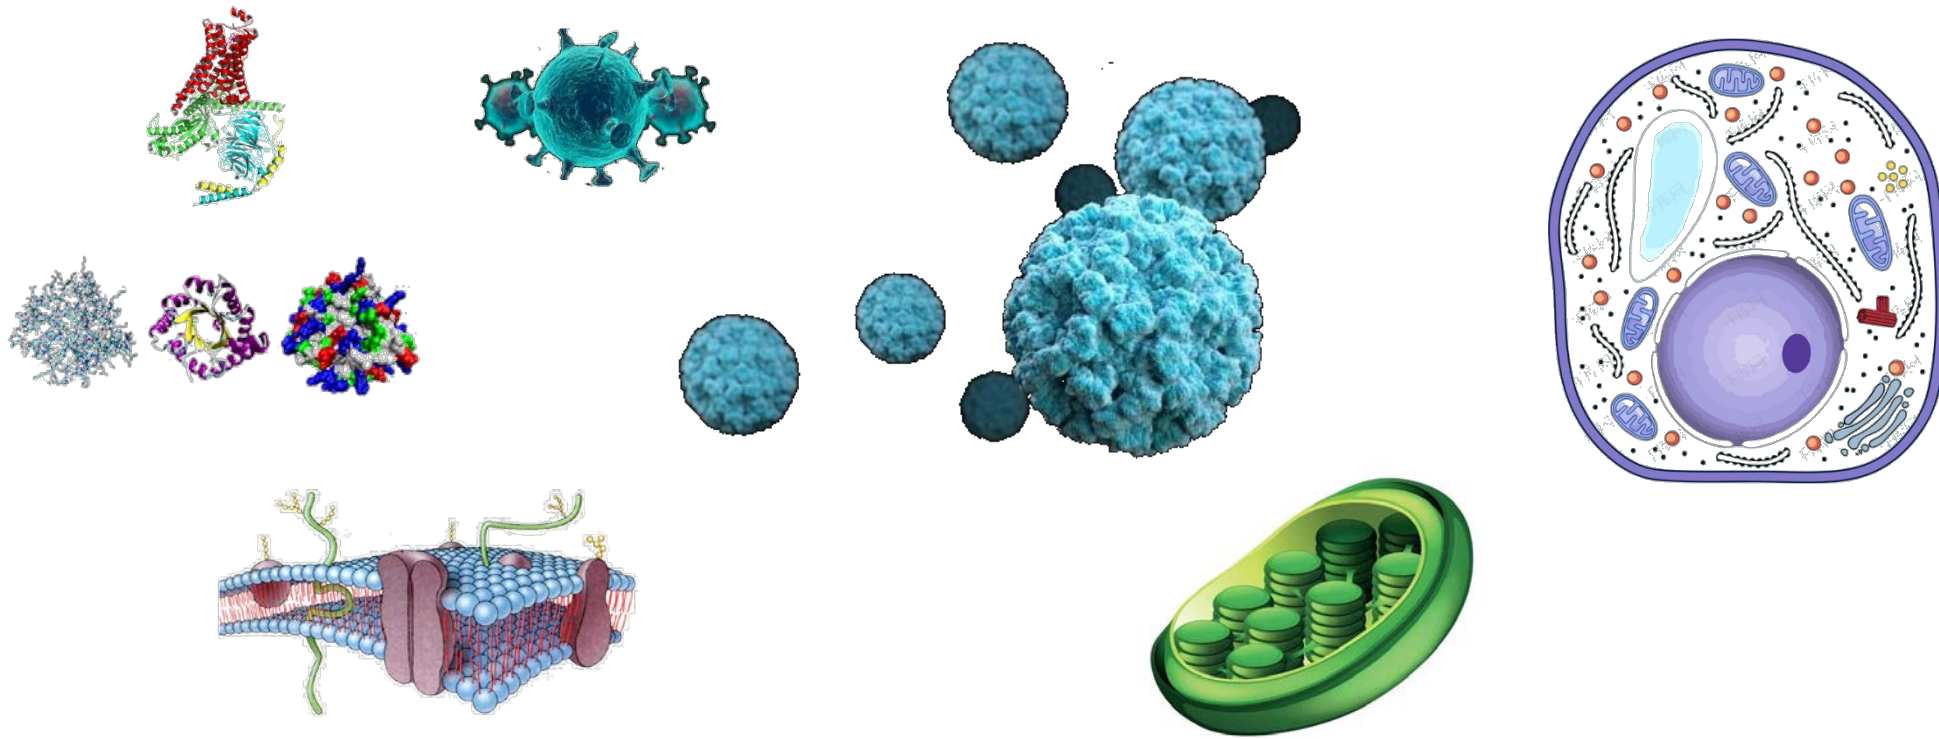

# H4-CBEs (unicellular organisms) emerged at a very tiny possibility (life origin)

H4-CBEs had very complicated structures  
So their emergence possibility is very tiny (e.g. once in a million years)

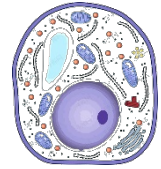

The very complicated structures of H4-CBEs enabled them to conduct various natural organic syntheses

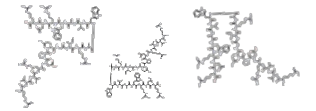

The products or results of these various natural organic syntheses conducted by H4-CBEs were multiple copies of H4-CBEs

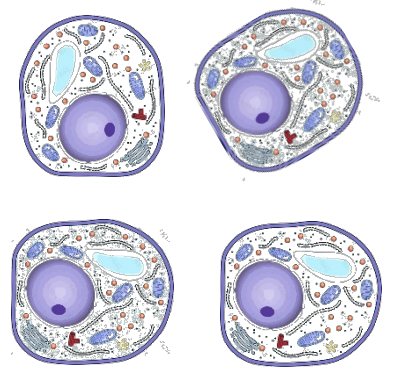

Reproduction of H4-CBEs led to increase in the amounts of H4-CBEs

# “Selfish” synthesis of organic molecules in H4-CBEs

H4-CBEs had very complicated structures  
So their emergence possibility is very tiny (e.g. once in a million years)

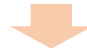

The very complicated structures of H4-CBEs enabled them to  
conduct various natural organic syntheses

Various enzymes  
aid these organic  
syntheses

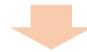

The products or results of these various natural organic syntheses  
conducted by H4-CBEs were multiple copies of H4-CBEs

H4-CBEs conduct  
more and more  
organic syntheses  
with the aids of  
many enzymes via  
their reproduction

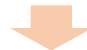

Reproduction of H4-CBEs led to increase in the amounts of H4-CBEs

“Selfish”  
synthesis

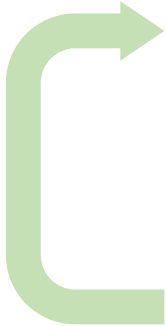

# The organic synthesis tendency drives origin and reproduction of H4-CBEs

In thermodynamics and chemistry, many low-hierarchy CBEs tend to absorb heat, move relatively rapidly, and form larger organic molecules

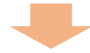

The formed various organic molecules along with other matter, spontaneously form many complicated structures, and a tiny of them are H4-CBEs

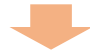

The organic synthesis tendency drives the chemical evolution and origin of H4-CBEs

H4-CBEs can reproduce themselves due to their complicated structures if they obtain heat and composing matter from the environment

The organic synthesis tendency on the Earth provides H4-CBEs with heat and composing matter for their reproduction

Reproduction of H4-CBEs meets the organic synthesis tendency because they efficiently synthesize various organic molecules

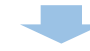

The organic synthesis tendency is the primary driving force for reproduction of H4-CBEs

If the Earth were too cold, it could not have the organic synthesis tendency, and CBEs could not increase their hierarchies, which means life could not originate and develop



# In chemistry: H4-CBEs should have genomes which are made of certain H3-CBEs

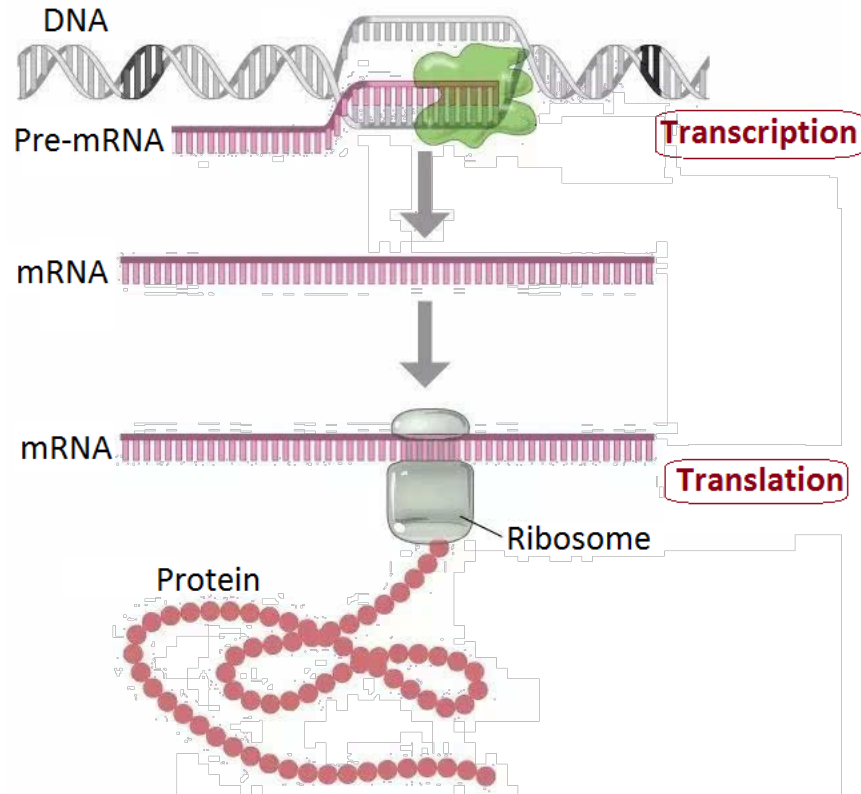

Reproduction of H4-CBEs means many H3-CBEs are synthesized relatively precisely according to certain sequences

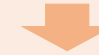

H4-CBEs should have genomes which are some H3-CBEs (i.e. organic macromolecules) encoding much information to direct syntheses of H3-CBEs as per certain sequences

Otherwise, in chemistry, no H3-CBEs could be produced relatively precisely



# Reproduction of H4-CBEs with various changes

Although reproduction of H4-CBEs is relatively precise, their offspring carry some changes, mainly because changes in the reproduction of genomes are chemically unavoidable

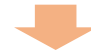

Increase in the diversity of H4-CBEs leads to many types of H4-CBEs

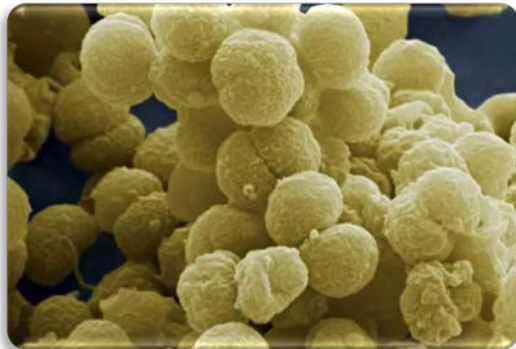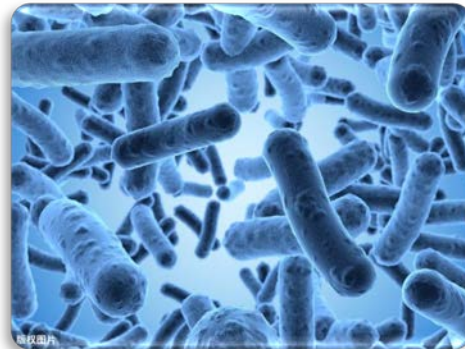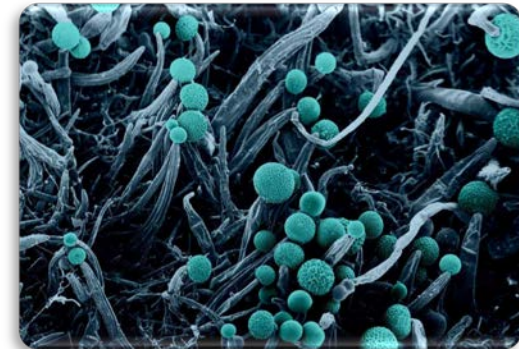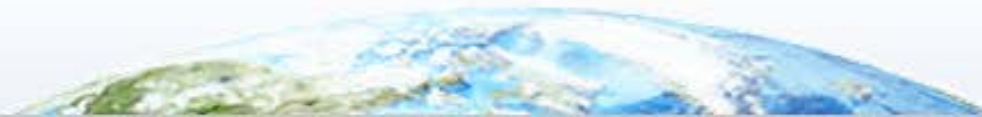

# Emergence and development of H5-CBEs (multicellular organisms)

A tiny part of many types of H4-CBEs spontaneously become H5-CBEs who are much more complicated in structure than H4-CBEs

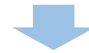

Although reproduction of H5-CBEs requires more heat and more composing matter, and H5-CBEs are more vulnerable than some H4-CBEs in some environments, some H5-CBEs (e.g. grasses and birds) could reproduce themselves and increase their amounts through collaboration of their cells in many environments and the support of the organic synthesis tendency on the Earth



# Reproduction of H5-CBEs with various changes

Although reproduction of H5-CBEs is relatively precise, their offspring carry some changes, mainly because changes in the reproduction of genomes are chemically unavoidable

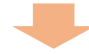

Increase in the diversity of H5-CBEs leads to many types of H5-CBEs

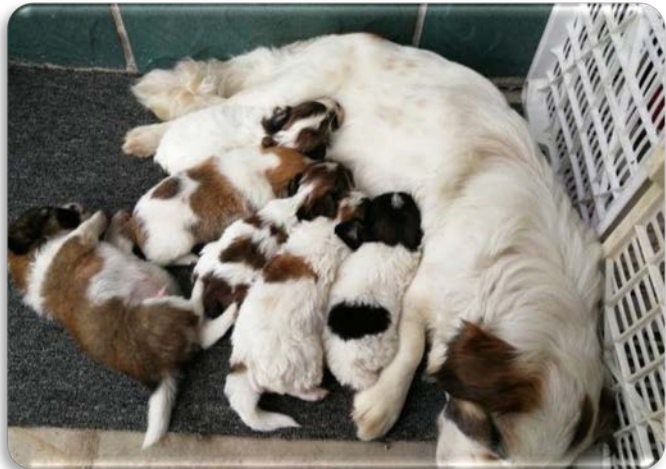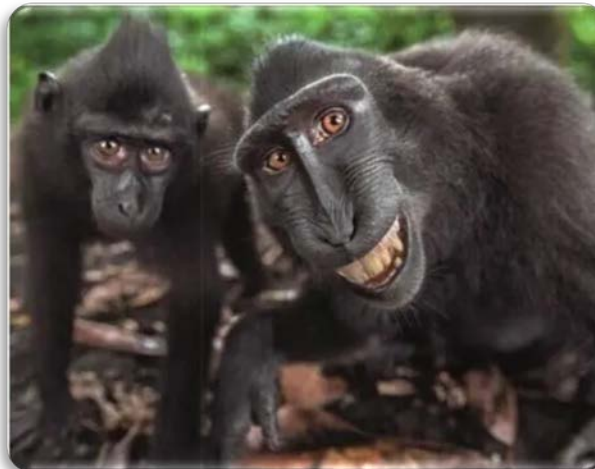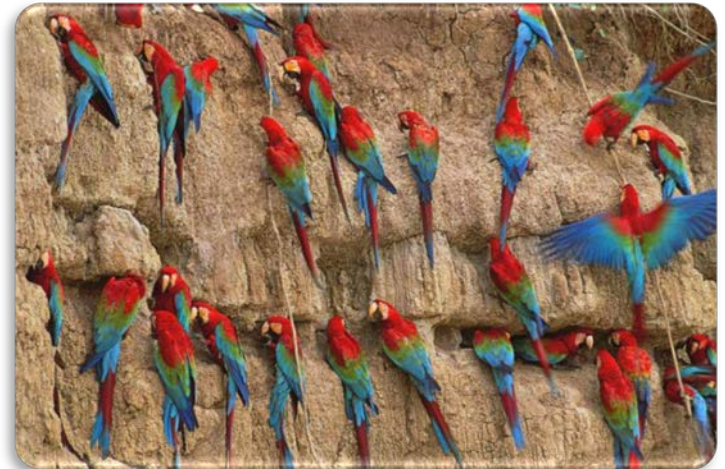

# Emergence and development of animals

Decomposition of H4-CBEs and H5-CBEs provides temperate heat and composing matter for reproduction of other organisms

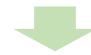

Emergence and development of decomposers (e.g. fungi), consumers (e.g. animals), and parasites (e.g. ascarid) in ecosystems

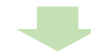

These roles aid to maintain the relative balance between the overall organic synthesis tendency and the overall organic decomposition tendency on the Earth

H1-CBEs  $\longleftrightarrow$  H2-CBEs  $\longleftrightarrow$  H3-CBEs

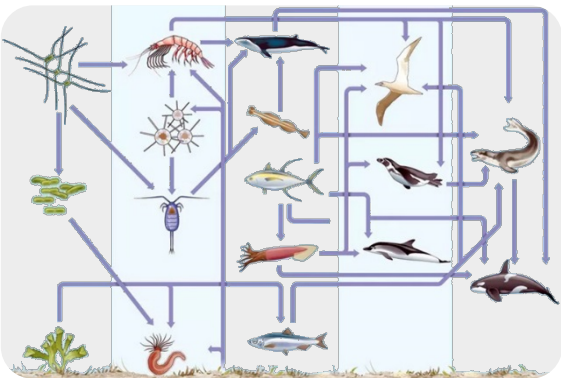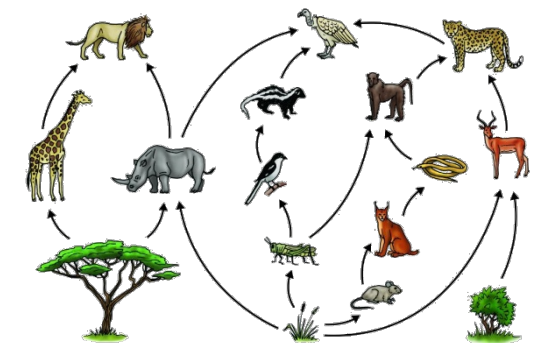



# Emergence and development of H6-CBEs (animal societies)

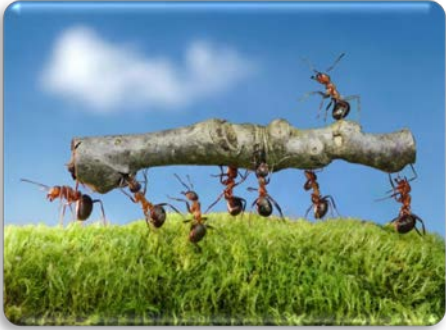

Animals should protect themselves and obtain enough food which contains heat and composing matter

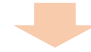

Animals fulfill these functions through various strategies based on their complicated structures

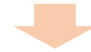

One strategy is that many animal individuals of the same species collaborate closely with each other and form animal societies

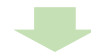

Some H6-CBEs (e.g. ant societies, bee societies) could maintain their existence through collaboration of their components and the support of the organic synthesis tendency on the Earth

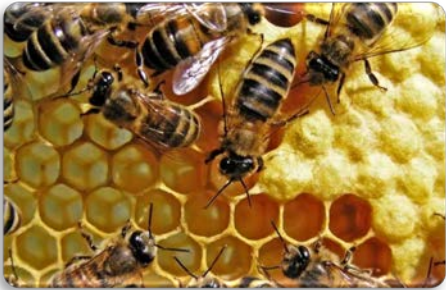

It requires a long geological period to form an H6-CBE which is more complicated in structures than its ancestor

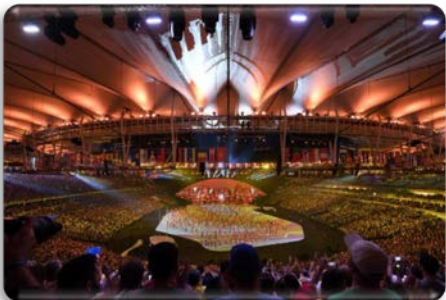

# Five phases of evolution of CBEs embodied in current organisms

| Phase | Definition                     | Examples                                                                  | Note                                                                |
|-------|--------------------------------|---------------------------------------------------------------------------|---------------------------------------------------------------------|
| 1     | Some H1-CBEs evolve to H2-CBEs | Carbon dioxide and water form glucose                                     | Organic synthesis                                                   |
| 2     | Some H2-CBEs evolve to H3-CBEs | Amino acids form proteins;<br>nucleotides form nucleic acids              | Organic synthesis                                                   |
| 3     | Some H3-CBEs evolve to H4-CBEs | Proteins, nucleic acids, and various other molecules form fertilized eggs | These structures can reproduce themselves through organic synthesis |
| 4     | Some H4-CBEs evolve to H5-CBEs | Fertilized eggs form ants                                                 |                                                                     |
| 5     | Some H5-CBEs evolve to H6-CBEs | Ants form ant societies                                                   |                                                                     |

These five phases all require organic synthesis driven by thermodynamics, and they all meet the organic synthesis tendency. Hence the organic synthesis tendency on the Earth is the primary driving force of these phases

In thermodynamics and chemistry, organisms live for and via organic synthesis

# The organic decomposition tendency is also important

Organic molecules can be decomposed only after they have been formed and many organic molecules can be preserved for a relatively long time

The overall organic synthesis tendency outran the organic decomposition tendency on the early Earth

Repeated organic decomposition provides temperate heat and composing matter for repeated organic syntheses

Many organic decomposition reactions are accompanied with organic syntheses in many organisms for providing heat and/or composing matter

H1-CBEs  $\rightleftharpoons$  H2-CBEs  $\rightleftharpoons$  H3-CBEs



- 1 History & background of the CBET
- 2 The primary driving force of evolution
- 3 The mechanisms of evolution**
- 4 Reliability & significance of the CBET
- 5 Questions & answers
- 6 Generalization of the CBET





# Three progressive mechanisms of evolution

- The driving force mechanism leading to increase in hierarchy, structural complexity, and diversity of CBEs as per thermodynamics (see the above slides)
- The structure-function mechanism which means that some HHCBEs spontaneously have novel complicated functions which their components do not have (e.g. green fluorescence protein spontaneously emits fluorescence, although no amino acids can emit fluorescence)
- The natural selection mechanism leading to increase in fitness of HHCBEs (see the following slides)



## Interaction of these three mechanisms generates the possibility of evolution

### The driving force mechanism

The OS tendency on the Earth from thermodynamics and chemistry provides the force (i.e. energy) to drive the origin and reproduction of various HHCBs; the reproduction increases the amount of HHCBs via OS and increases the diversity of HHCBs via changes

### The structure-function mechanism

Due to interaction of their components, some HHCBs have spontaneously some functions that their components do not have, to support their existence and reproduction

### The natural selection mechanism

Some HHCBs with certain functions are maintained and reproduced more efficiently, particularly when heat or composing matter is scarce. This leads to increase in the fitness of HHCBs (i.e. accumulation of certain functions) and increase in the OS efficiency on the Earth

# Self-reproduction, non-random mutation, sexual reproduction, can all be realized through complicated structures

All these functions have to be under natural selection

## **Significance of self-reproduction in natural selection**

This function can directly increase the amounts of HHCBs and maintain the advantages of HHCBs for natural selection

## **Significance of non-random mutation in natural selection**

This function facilitates to generate advantageous mutations and avoid disadvantageous mutations

## **Significance of sexual reproduction in natural selection**

This function facilitates to generate numerous mutants which are useful to fit different environments, through recombination of genomic sequences, and this mutation strategy is less risky than nucleotide substitution because the recombined genomic sequences have passed long-term natural selection

# Natural selection is a tautology with prerequisites

Fit HHCBEs survive, and those HHCBEs that have survived are fit HHCBEs  
Those HHCBEs having larger amounts are fitter HHCBEs, and fitter HHCBEs have larger amounts

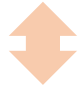

Natural selection does not exist without repeated regeneration of HHCBEs on the Earth

Natural selection must exist with repeated regeneration of HHCBEs on the Earth

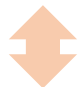

Different HHCBEs usually reproduced and maintained at different rates

Repeated regeneration of HHCBEs and its driving force from thermodynamics are prerequisites of natural selection

The running champion is the one who runs the fastest, and the one who runs the fastest is the running champion

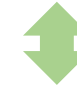

A running champion does not exist without a running race

There must be a champion if there is a running race

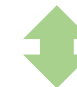

Different runners usually run at different speeds

A running race and its organization are prerequisites for existence of a champion

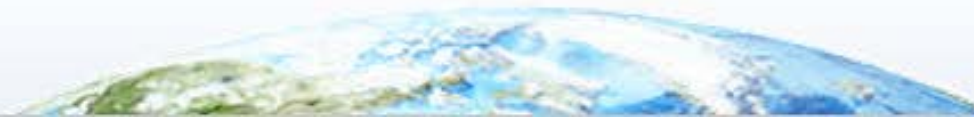

# The primary driving force of evolution is the first leading role in evolution

## The driving force mechanism

The OS tendency on the Earth from thermodynamics and chemistry provides the force (i.e. energy) to drive the origin and reproduction of various HHCBs; the reproduction increases the amount of HHCBs via OS and increases the diversity of HHCBs via changes

## The structure-function mechanism

Due to interaction of their components, some HHCBs have spontaneously some functions that their components do not have, to support their existence and reproduction

## The natural selection mechanism

Some HHCBs with certain functions are maintained and reproduced more efficiently, particularly when heat or composing matter is scarce. This leads to increase in the fitness of HHCBs (i.e. accumulation of certain functions) and increase in the OS efficiency on the Earth



# Different from existing theories

## In Darwin's theory & the Modern Synthesis

Natural selection is claimed to be the driving force of evolution  
Natural selection is claimed to be the first leading role in evolution  
Natural selection is a tautology of weak roots because the theories do not explain why organisms repeatedly reproduce themselves

## In the CBET

Natural selection stems from the primary driving force of evolution deduced from thermodynamics, and has hence solid roots  
The primary driving force is the first leading role in evolution  
Natural selection could be the secondary driving force directly affecting many traits of HHCBEs



# Different from existing theories

## **Darwin's theory (Survival of the fittest )**

Due to excessive reproduction and fierce competition

The mainstream evolutionary theory established in the 19th century

## **The Modern Synthesis (Survival of the fitter)**

Gradual changes in gene frequencies as the individuals carrying adaptive mutations are more reproductively successful

The mainstream evolutionary theory established in the 20th century

## **The CBET (Survival of the fit)**

Those HHCBEs fitter in general are more relatively successful in the combined effect of reproduction and longevity, which leads to increase in the fitness (This is similar to the Modern Synthesis)

Those HHCBEs carrying changes advantageous, neutral, or disadvantageous in selection all survive if their overall fitness is adequate in suitable environments, which leads to increase in the diversity of HHCBEs

Those HHCBEs carrying advantageous changes could be eliminated if their overall fitness becomes inadequate in harsh environments, e.g. mass extinction due to asteroid impacts

Besides reproduction rates, the CBET highlights the longevity of HHCBEs



# Different from existing theories

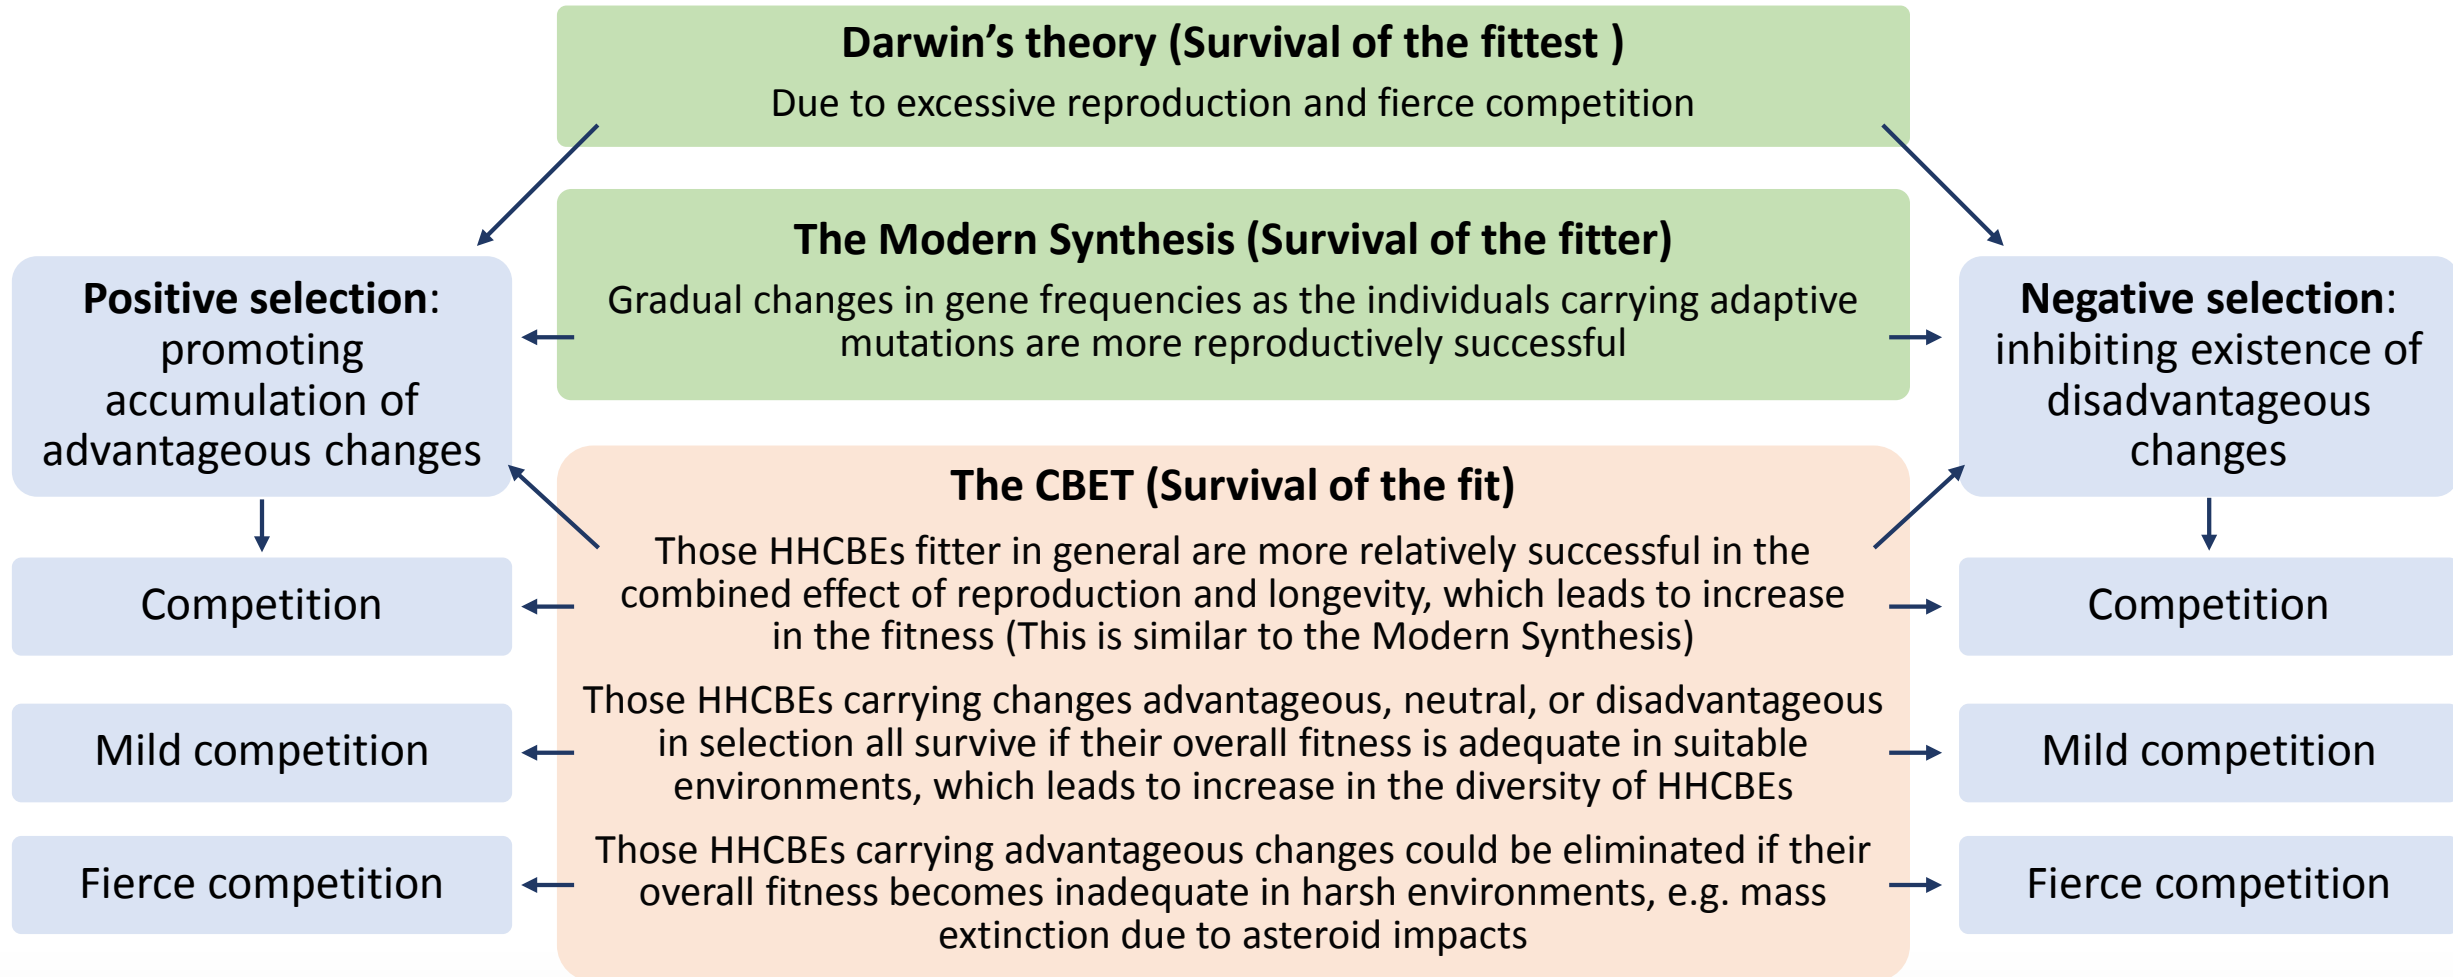



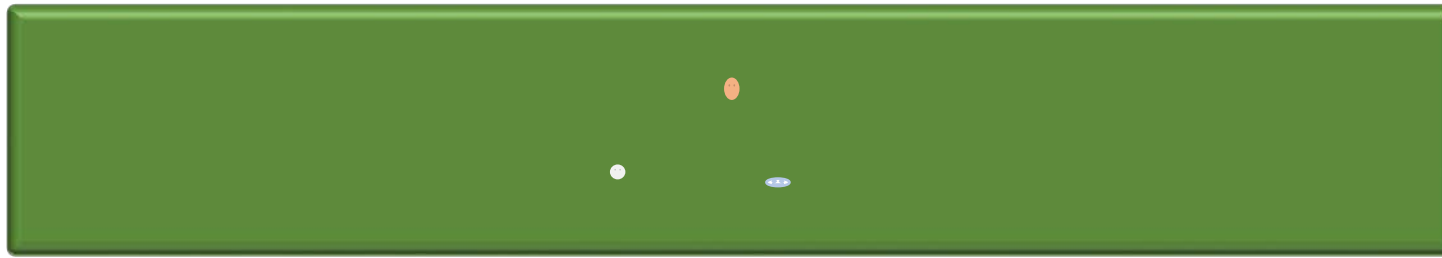

When the environment is far from saturated with certain HHCBEs  
the competition for heat or composing matter is mild  
Those HHCBEs with less fitness could be fit, survive, and increase their amounts

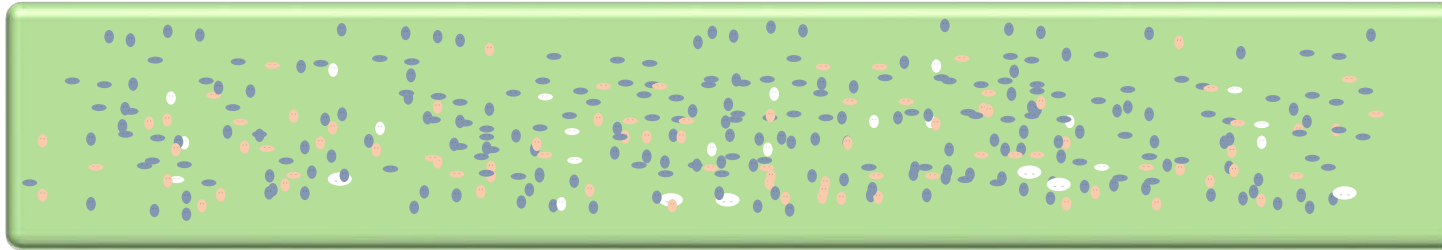

When the environment is saturated with certain HHCBEs  
the competition becomes fierce, and the less fit HHCBEs are gradually replaced  
by the fitter HHCBEs, leading to increase in fitness of the HHCBEs

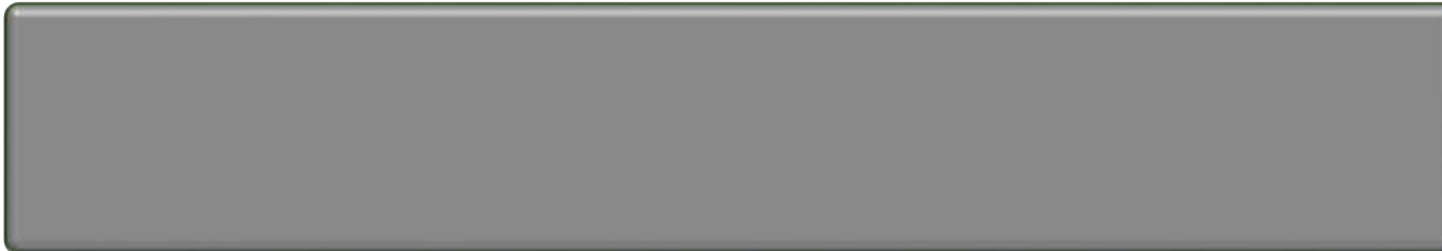

When the environment becomes very harsh  
The competition for heat or composing matter is very fierce  
leading to mass elimination of HHCBEs, sometimes including the fittest HHCBEs

# Different from existing theories

## In Darwin's theory & the Modern Synthesis

Natural selection usually targets only inheritable changes  
Genetic mutations occur at random

## In the CBET

Genetic mutations, epigenetic changes, and uninheritable changes (e.g. vaccination) all influence the overall fitness of HHCBEs, and are thus all under natural selection

Some genetic changes (e.g. those regarding antibody diversity) are not random due to complicated functions of organisms

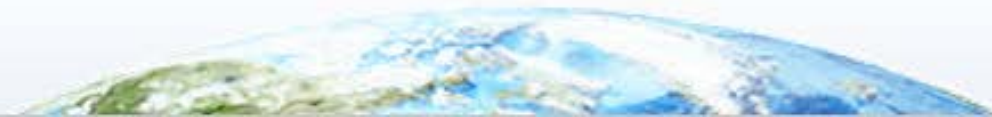

# Different from existing theories

## In Darwin's theory & the Modern Synthesis

Natural selection is usually based on the fitness of a single aspect

A biological trait (e.g. long necks of giraffes, altruism) is usually assumed to be advantageous in natural selection

## In the CBET

Natural selection is based on the overall fitness

A biological trait (e.g. long necks of giraffes) may be neutral, advantageous, or disadvantageous in natural selection in general

A biological trait may be advantageous in some aspects, and disadvantageous in other aspects (e.g. long necks of giraffes are useful for finding predators, but add burdens to bones and hearts), so the trait may be under positive selection in some aspects and under negative selection in some other aspects



# The CBET reveals a novel mechanism for sympatric speciation

Previously, no mechanism for sympatric speciation targeting the same ecological niches of the same area was proposed

In the CBET, organisms with different combinations of traits can speciate in the same ecological niche in the same area because they all have adequate overall fitness particularly when the mutants have small populations

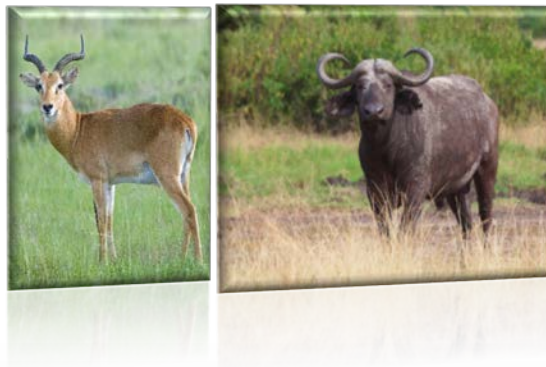

Antelopes and buffaloes have different advantages and disadvantages, and they both have adequate fitness throughout the history, and thus they could speciate in the same niches of the same area



# The CBET suggests a novel mechanism for punctuated equilibrium

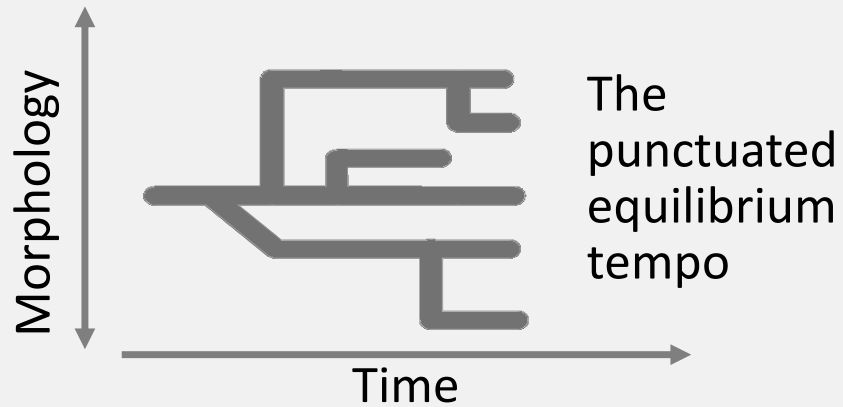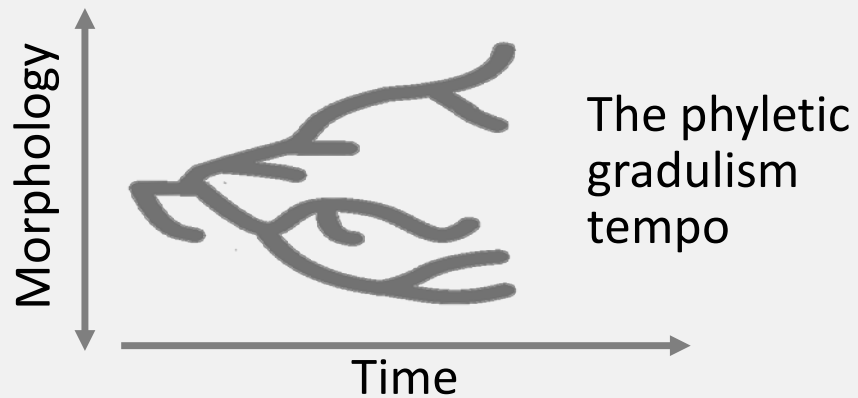

## Punctuated equilibrium

Little change in long geological periods and significant changes in short geological periods, as demonstrated by fossils of many species

Previously, only geographical isolation was employed to explain punctuated equilibrium in an elusive way

# The CBET suggests a novel mechanism for punctuated equilibrium

Co-action of positive selection and negative selection  
on the same trait as per spatial or climate/ecological changes

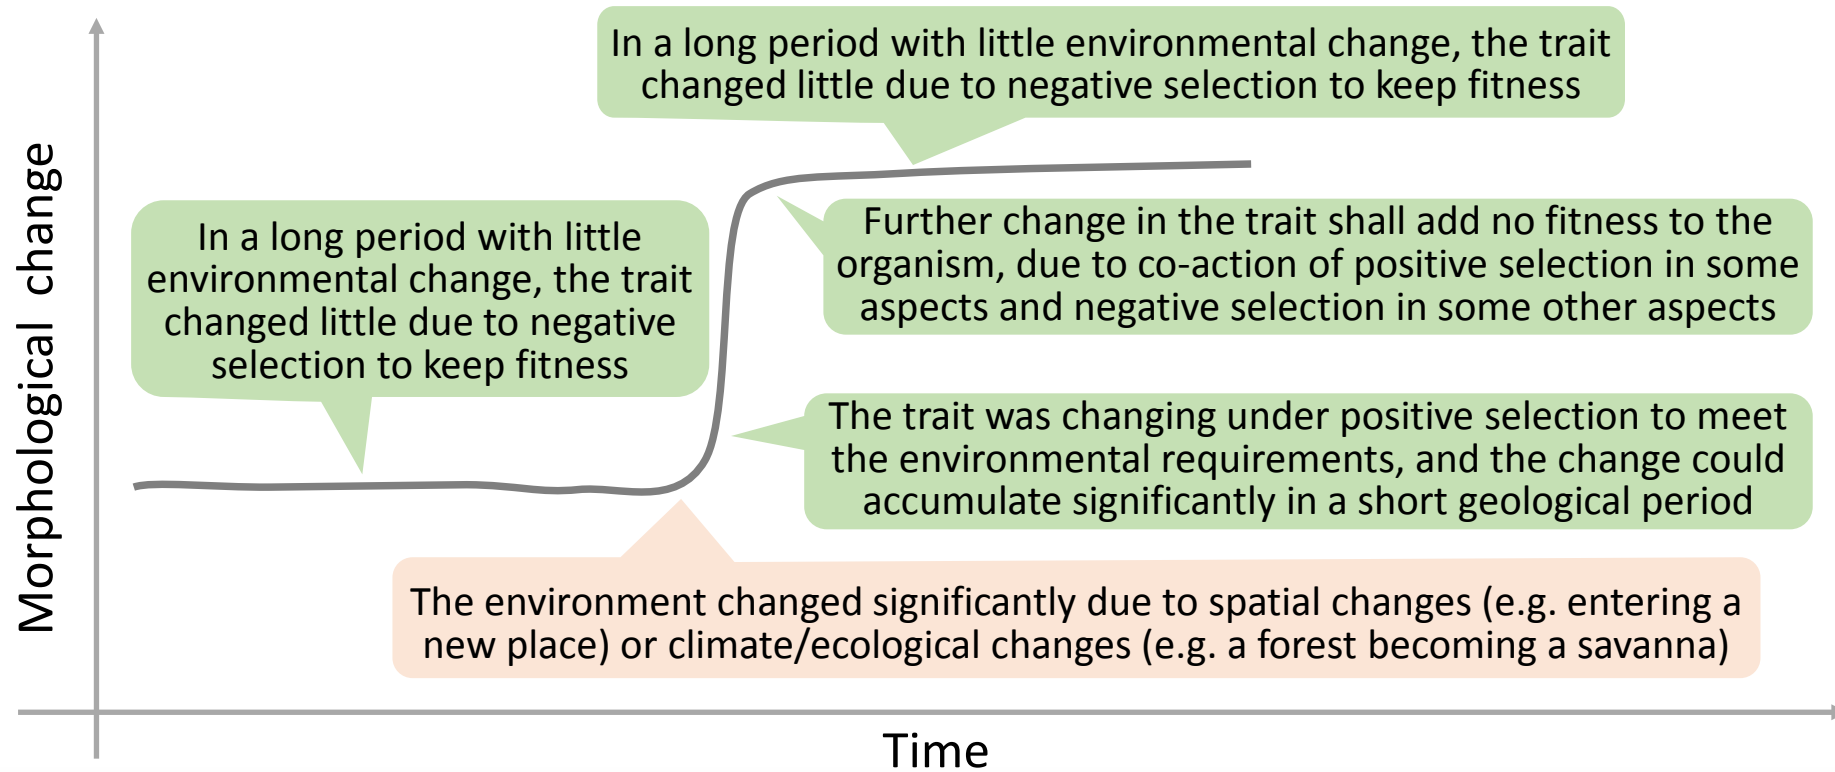

# **The tempo of genomic changes can also lead to punctuated equilibrium**

**(Some genomic changes adding significant fitness occur at very low rates)**

- H7N9 avian influenza virus emerged in China in 2013
- This virus kept low pathogenic to chickens during the years 2013 – 2016, almost no chickens infected with this virus died of the viral infection
- At the end of 2016, the virus became highly pathogenic to chickens 2016, and hence most of the chickens infected with this virus died of the viral infection, due to insertion of two amino acids in the viral hemagglutinin gene
- It usually requires a long time for the virus to occur this genomic change which can add greatly the fitness of the virus
- The highly pathogenic H7N9 avian influenza spread rapidly around China within five months, and kept its high pathogenicity till date (2021)



# The CBET provides better explanations for life origin and macroevolution events

| Events                                                        | Explanations of the CBET                                                                                                                                                                                                                                                                                                                                                                               | Existing explanations                                                                                                                                                                                           |
|---------------------------------------------------------------|--------------------------------------------------------------------------------------------------------------------------------------------------------------------------------------------------------------------------------------------------------------------------------------------------------------------------------------------------------------------------------------------------------|-----------------------------------------------------------------------------------------------------------------------------------------------------------------------------------------------------------------|
| Life origin                                                   | The organic synthesis (OS) tendency on the Earth led to accumulation of vast organic molecules, which along with other matter spontaneously formed many structures, and a tiny of them were life structures; life structures are more difficult than dead structures, but some of them can maintain and reproduce themselves with their inner collaboration and the outside support of the OS tendency | The mechanisms of life origin are explained with elusive concepts (e.g. negative entropy, dissipation systems, and self-organization) without mention of the effect of chemical reactions and natural selection |
| Some unicellular organisms evolved to multicellular organisms | Many niches could be better employed for organic syntheses by multicellular organisms for their reproduction; multicellular organisms could have adequate fitness even if they could be less fit than unicellular organisms in many environments                                                                                                                                                       | The reasons are unknown, because unicellular organisms could be fitter than multicellular organisms in many environments                                                                                        |
| Some ectotherm animals evolved to warm-blooded animals        | Many biomaterials could be better employed for organic syntheses by warm-blooded animals for their reproduction; warm-blooded animals could have adequate fitness even if they could be less fit than ectotherm animals in many environments                                                                                                                                                           | The reasons are unknown, because ectotherm animals could be fitter than warm-blooded animals in many environments                                                                                               |

# The CBET highlights collaboration, altruism, obeying rules, and restriction of freedom

- Many small molecules spontaneously collaborate with each other, “sacrifice” their freedom, and obey some rules to form large organic molecules (e.g. amino acids form proteins)
- Many molecules inside cells spontaneously collaborate with each other, “sacrifice” their freedom, and obey some rules to support the replication and functions of nucleic acids
- Many immune cells in multicellular organisms spontaneously collaborate with each other, “sacrifice” their freedom, and obey some rules to support the production and functions of other cells
- Many individuals in animal societies spontaneously collaborate with each other, “sacrifice” their freedom, and obey some rules to support the birth and functions of other individuals

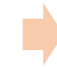

Collaboration, altruism(a special collaboration supporting the production and functions of other entities), obeying rules, and restriction of freedom constitute fitness of HHCBEs and are important throughout evolution



# The CBET highlights proper extension of freedom

- Many atoms can hardly move in large molecules (little freedom)
- Many molecules can move around inside cells (freedom increased a little)
- Many cells can move in multicellular organisms (freedom further increased)
- Many animal individuals can move in certain areas (freedom increased obviously)



The above slides suggest that the CBET provides better explanations for various evolutionary issues

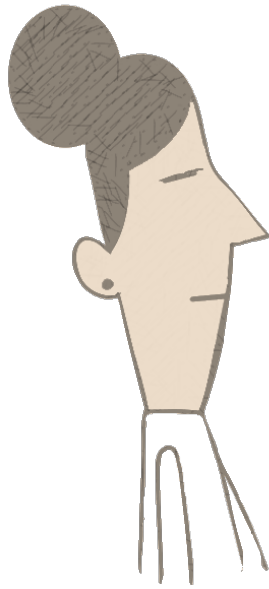

Yes, the CBET provides better explanations for the widespread neutral or harmful mutations, non-random mutations, life origin, macroevolution events, sympatric speciation, punctuated equilibrium, and altruism

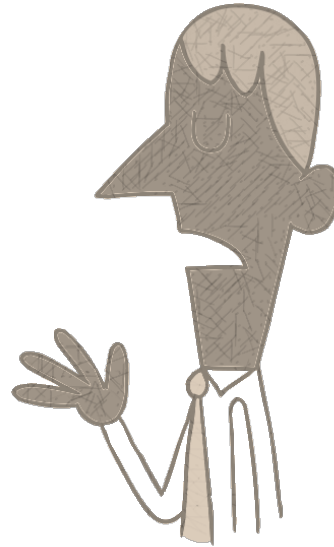

# Influence of evolution on evolution

| Phase | Definition                     | Examples                                                     | Examples of influence of evolution on evolution                                                                                                                                                                                                                                                                                                                                                                                      |
|-------|--------------------------------|--------------------------------------------------------------|--------------------------------------------------------------------------------------------------------------------------------------------------------------------------------------------------------------------------------------------------------------------------------------------------------------------------------------------------------------------------------------------------------------------------------------|
| 1     | Some H1-CBEs evolve to H2-CBEs | Carbon dioxide and water form glucose                        | Producing organic molecules for forming HHCBEs<br>Producing molecules (e.g. ATP) for transferring heat                                                                                                                                                                                                                                                                                                                               |
| 2     | Some H2-CBEs evolve to H3-CBEs | Amino acids form proteins;<br>nucleotides form nucleic acids | Accumulating various enzymes which accelerate natural organic syntheses<br>Producing organic molecules for forming organisms                                                                                                                                                                                                                                                                                                         |
| 3     | Some H3-CBEs evolve to H4-CBEs | Various molecules form fertilized eggs                       | a. Complicated structures of organisms facilitate various organic syntheses<br>b. Organisms provide energy and organic matter for the evolution of other organisms<br>c. Organisms change the environment and provide novel selection pressures for organisms<br>d. Sexual selection of animals directly influence some traits of many animals<br>e. Human evolution has great and extensive influences on evolution of many species |
| 4     | Some H4-CBEs evolve to H5-CBEs | Fertilized eggs form ants                                    |                                                                                                                                                                                                                                                                                                                                                                                                                                      |
| 5     | Some H5-CBEs evolve to H6-CBEs | Ants form ant societies                                      |                                                                                                                                                                                                                                                                                                                                                                                                                                      |

- 1 History & background of the CBET
- 2 The primary driving force of evolution
- 3 The mechanisms of evolution
- 4 Reliability & significance of the CBET**
- 5 Questions & answers
- 6 Generalization of the CBET



# Reliability of the CBET

It is deduced mainly from the classical laws of thermodynamics using some factors well known to be crucial for evolution

I support the CBET because its conclusion is not strange, but rational and comprehensible

The CBET is not built on novel laws, novel observations, or novel experiments

No one has found that any biological reaction does not comply with the classical laws of thermodynamics

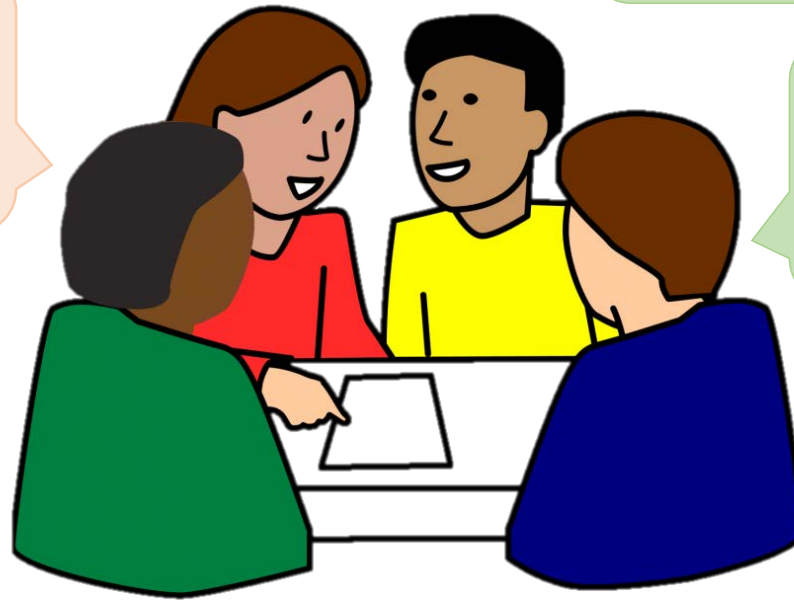



# Reliability of the CBET

Many evolutionary phenomena are explained better by the CBET than by existing theories. This strongly supports the CBET

Yes. The CBET provides better explanations for life origin, macroevolution, prevalent neutral mutations, widespread disadvantageous mutations (e.g. thalassemia mutations), non-random mutations, effects of uninheritable traits on fitness, sympatric speciation, punctuated equilibrium, altruism, etc.

The CBET is supported by numerous facts

Mm..., I have not found any biological fact which is against the CBET

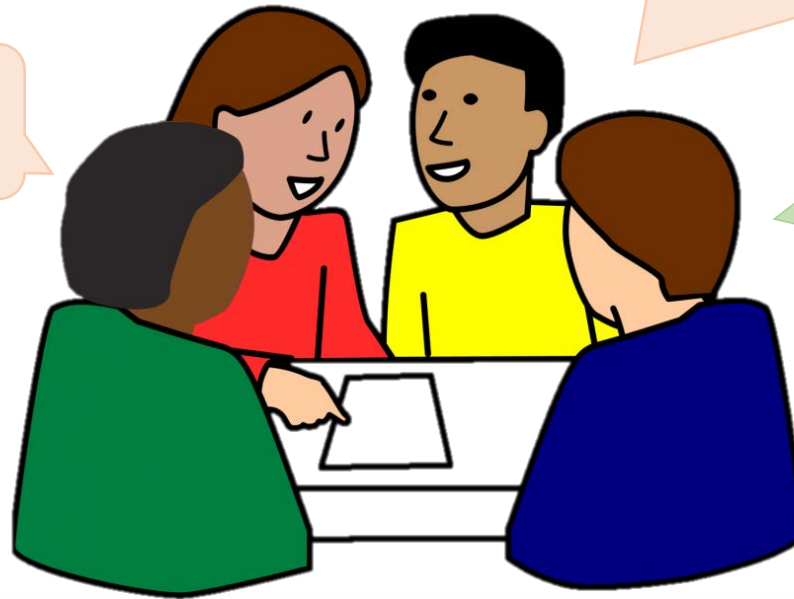

# Significance of the CBET in thermodynamics/physics

## Existing theories in thermodynamics regarding evolution

- Do not highlight the specific thermodynamic features of the Earth which are well known to be important for evolution
- Do not combine chemistry of CBEs and laws of thermodynamics to explain evolution in a direct and understandable way

The CBET could be the first evolutionary theory revealing the driving force and mechanisms of evolution from the chemical effect of classical laws of thermodynamics on CBEs using easily understandable words

Remove the contradiction between evolution and the second law of thermodynamics



# Significance of the CBET for thermodynamics/physics

## Existing theories in thermodynamics regarding evolution

Difficult to understand, controversial, or even wrong  
mainly because scientists were misled by  
the wrong notion that biological order is equal to thermodynamic order

Biological order increases slowly via long-term natural selection  
Thermodynamic order increases rapidly via releasing heat to the surroundings

Biological order requires movements of microscopic particles  
Thermodynamic order requires microscopic particles to be static  
(Cold perfect crystals have low entropy and high thermodynamic order)  
(Detailed later in this PPT file)



# Significance of the CBET for biology

The CBET reveals for the first time the driving force of evolution, which is the chemical effect of the thermodynamic features of the Earth on CBEs, the first leading role in evolution, and the prerequisite of natural selection

The CBET reveals the physiochemical roots of biological evolution and provides better explanations for various evolutionary issues

The CBET is hence more scientific and comprehensive from a broader perspective through multi-disciplinary integration

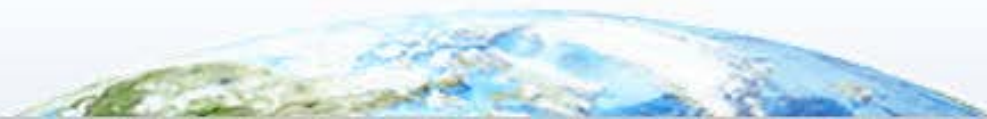

# Significance of the CBET for social development

## Existing evolutionary theories

Highlight fitness, selfishness, competition, genetic advantages, and elimination of those less fit in certain traits, which have been employed to justify authoritarianism, racism, fascism, and Nazism

## The CBET

Highlights the importance of fitness and diversity, selfishness and altruism, competition and collaboration, obeying rules and extending freedom, human welfare and environment protection, genetic advantages and uninheritable efforts

The CBET could be the first evolutionary theory revealing the basis of various important notions for harmonious social development



# The CBET could be the first bridge directly linking physics and biology and social sciences

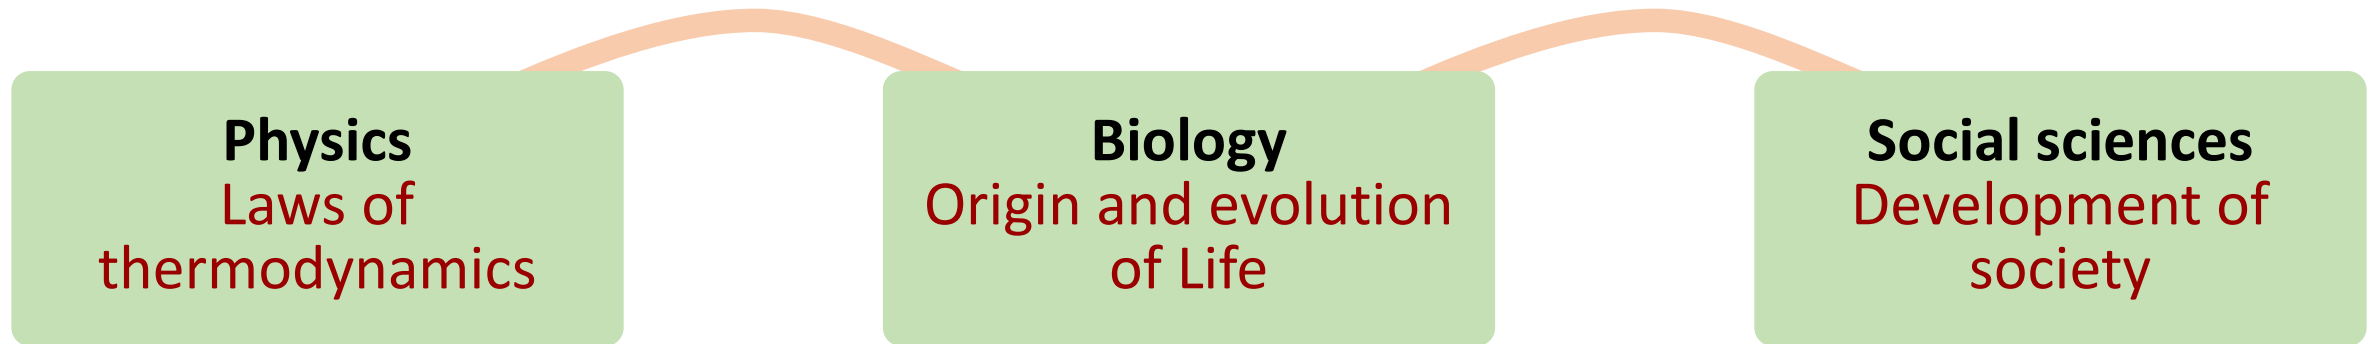

- 1 History & background of the CBET
- 2 The primary driving force of evolution
- 3 The mechanisms of evolution
- 4 Reliability & significance of the CBET
- 5 Questions & answers**
- 6 Generalization of the CBET



# Questions & Answers

Why silicon-based entities (SBEs) could not evolve into lives on the Earth?

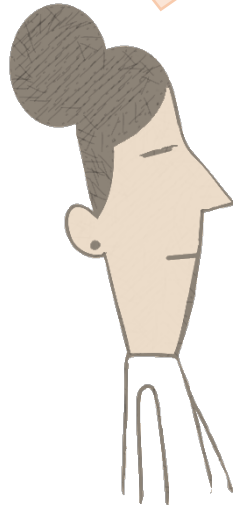

This could result from the fact that SBEs are usually too hard to form multiple hierarchies

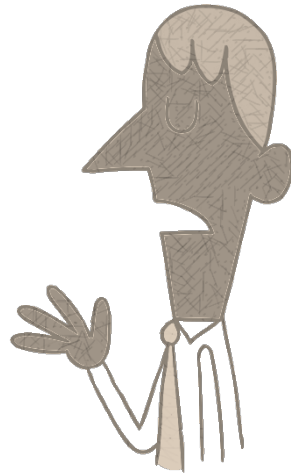



# Questions & Answers

What are the differences between the CBET and the DST?

The dissipative structure theory (DST) has been employed to explain some evolutionary issues

The CBET directly answers evolutionary questions, while the DST only indirectly talks about evolution

The CBET is easy to understand, while the DST is difficult to understand

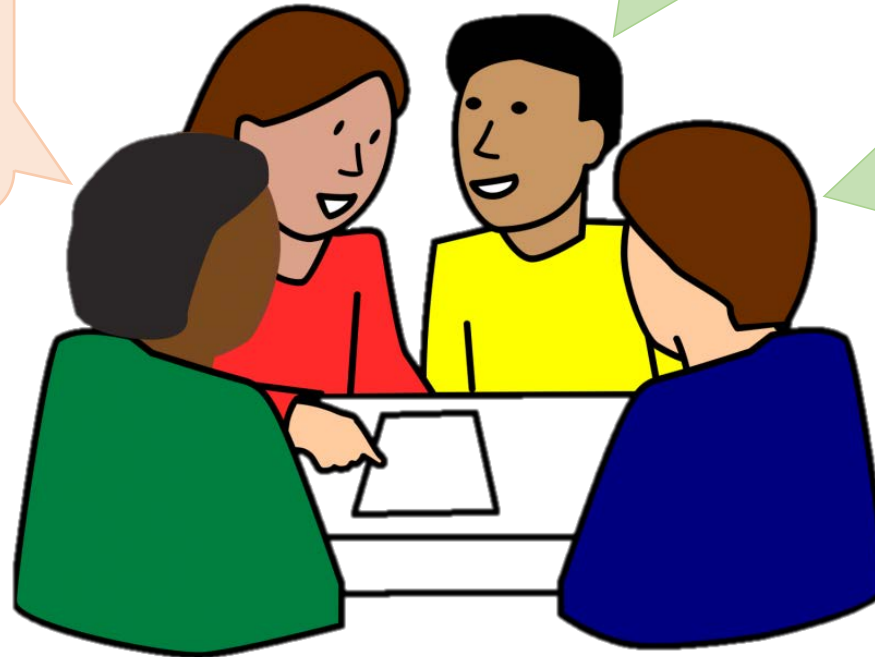

# Questions & Answers

The CBET reveals the driving force, mechanisms, possibility, and tempos about evolution. But it does not explain the certainty of evolution

Life emerges on a planet at a very tiny possibility, and so far life has been found only on the Earth

Will life surely emerge on a planet (e.g. Mars or Earth)?

The Earth is a very rare planet with temperate climate and much water, providing a very rare and very big suitable thermodynamic environment for life origin

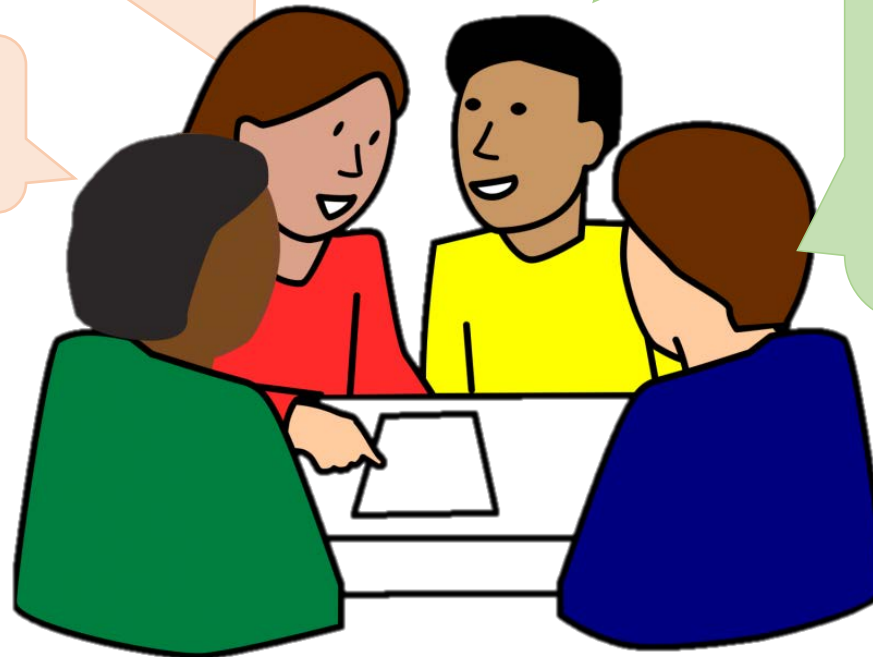

# Questions & Answers

Why does the CBET claim that biological evolution stems from the second law of thermodynamics?

It has been widely claimed that biological evolution is contrary to entropy increase, or contrary to the second law of thermodynamics

This is a very important question. It is also very difficult because entropy is an elusive concept

Please let me use some slides to tell you some interesting stories on this topic

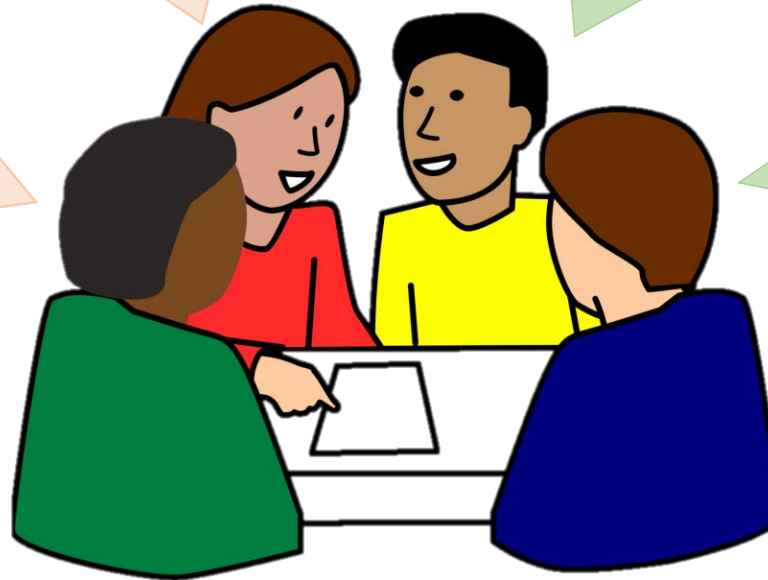

# Classical laws of thermodynamics

- The first law of thermodynamics: increase in internal energy of a closed system is equal to the work the surroundings gives to the system plus the heat the surroundings gives to the system
- The second law of thermodynamics: heat can spontaneously flow from a hotter body to a colder body, and cannot spontaneously flow from a colder body to a hotter body; or to say, the entropy of an isolated system never decreases over time
- The third law of thermodynamics: the entropy of a system approaches a constant value as its temperature approaches absolute zero, and the entropies of perfect crystals at absolute zero temperature are zero



# Classical laws of thermodynamics

- The first law of thermodynamics: increase in the internal energy of a system is equal to the work the surroundings give to the system minus the heat the surroundings gives to the system
- The second law of thermodynamics: heat can spontaneously flow from a hotter body to a colder body, and cannot spontaneously flow from a colder body to a hotter body; or to say, the entropy of an isolated system never decreases over time
- The third law of thermodynamics: the entropy of a perfect crystal at absolute zero temperature is zero

This simple expression regarding heat flowing is employed by the CBET

The CBET, with the aim to provide easily comprehensible explanations, avoids this difficult expression which is not required for deduction of the CBET



# Two basic formulas about entropy

$$dS \geq \delta Q/T \text{ (Clausius inequality)}$$

( $dS$ , changes of entropy;  $\delta Q$ , absorbed heat;  $T$ , absolute temperature)

Suggesting that a closed system increases its entropy via absorbing heat from the surroundings

$$S = k \times \ln \Omega \text{ (Boltzmann formula)}$$

( $S$ , entropy;  $k$ , a constant;  $\Omega$ , microstates)

Suggesting that the entropy of a system is only determined by its microstates which are related to the physical and chemical states of the system, and increase of microstates of a system shall increase the entropy of the system

Scientifically, all concepts derived from entropy should be consistent with these two original formulas



# As per these two formulas, when the stone absorbs heat

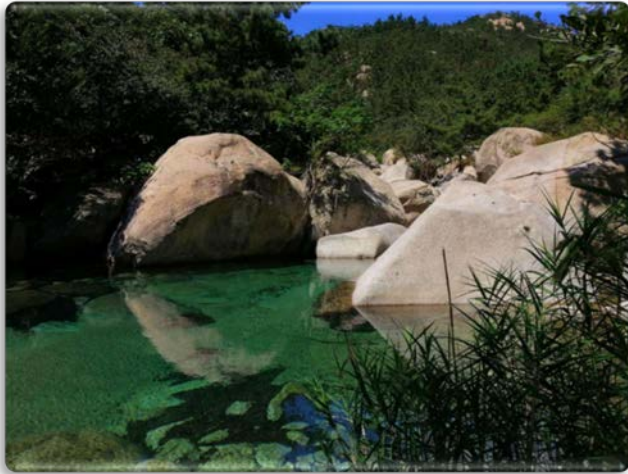

1. Its temperature becomes higher
2. Its molecular movement becomes faster
3. It has less order at the microscopic level in thermodynamics
4. It has more chaos at the microscopic level in thermodynamics
5. Its microstates increase, which means each microscopic particle in the stone has more possible states
6. Its entropy increases

The above sentences tell the SAME thing from six aspects

So we can understand the last two difficult sentences from the first four simple sentences

More entropy = More microstates = The microscopic particles become less static  
= Less thermodynamic order = More thermodynamic chaos



# When this seal is dying in the ice

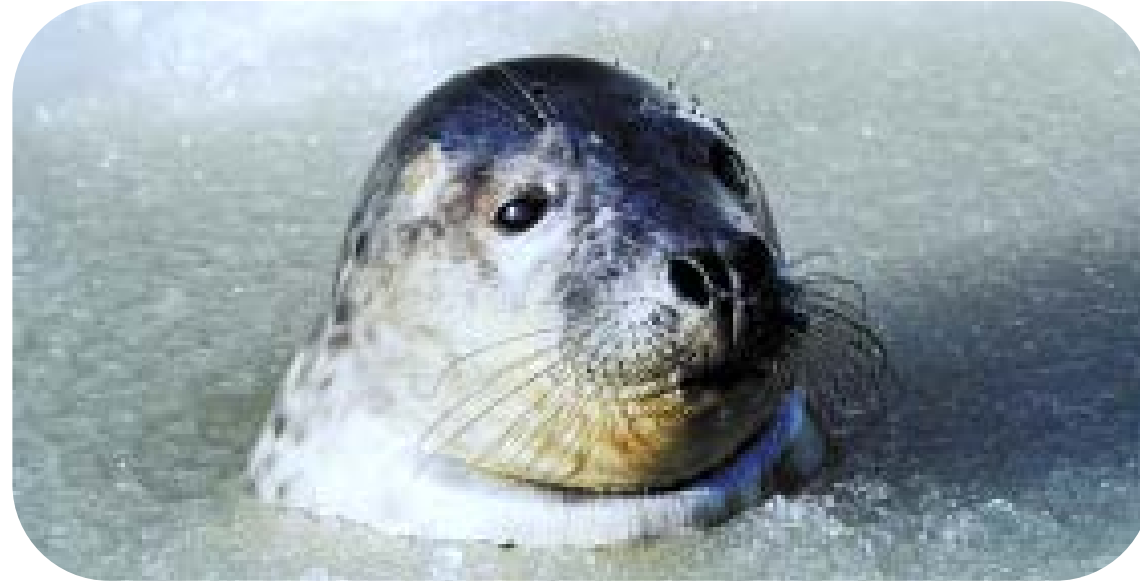

Its entropy is declining because the seal is releasing heat ( $dS \geq \delta Q/T$ )

Its thermodynamic order is increasing because its microscopic particles are becoming more static

Its biological order is, however, declining, as it is dying

(Biological order requires movements of microscopic particles)

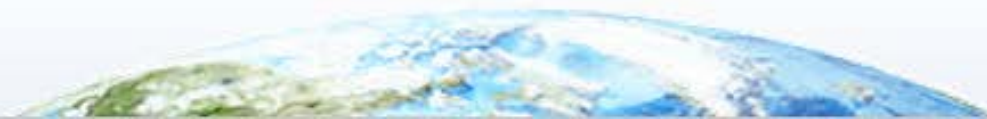



# As per the third law of thermodynamics

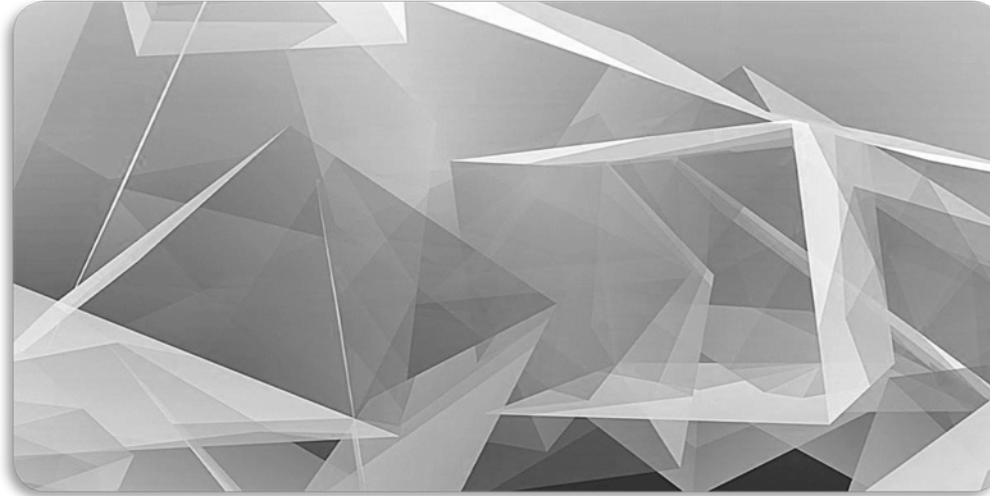

The entropy of any system is  $\geq 0$

The **entropy** of a perfect crystal at **absolute zero** temperature = 0

The **microstate** of a perfect crystal at **absolute zero** temperature = 1  
(all the **microscopic particles** in the crystal only have one fixed state)

A perfect crystal at absolute zero temperature has the highest order in thermodynamics  
Thermodynamic order favors microscopic particles to be static



**As per Clausius inequality,  $dS \geq \delta Q/T$ ,  
absorbing heat of CBEs for organic synthesis means increase of entropy**

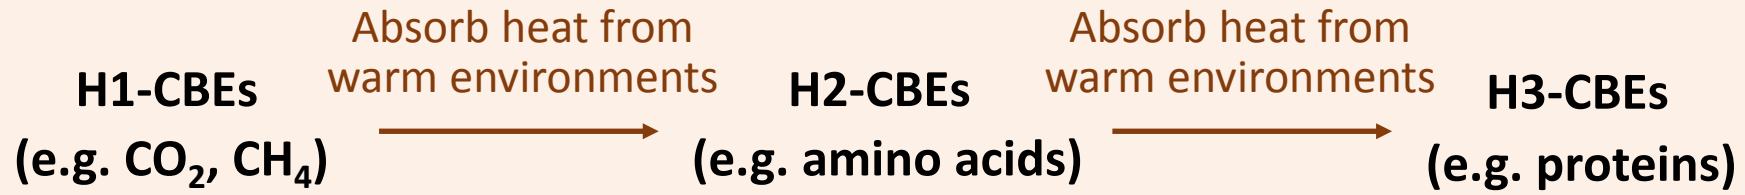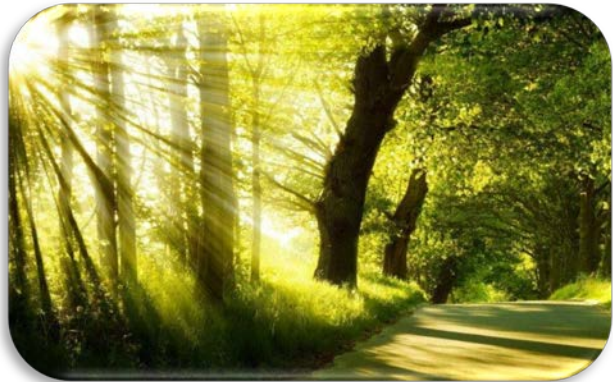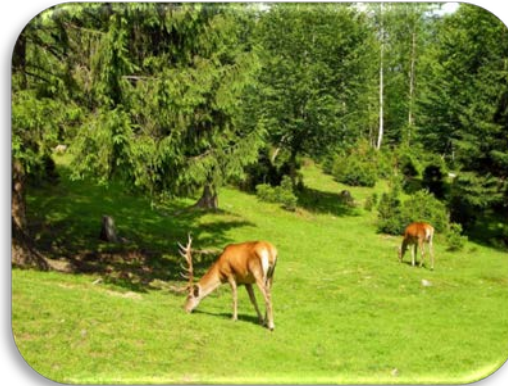

## Boltzmann, a father of entropy, claimed that *Life relies on and struggles for entropy*

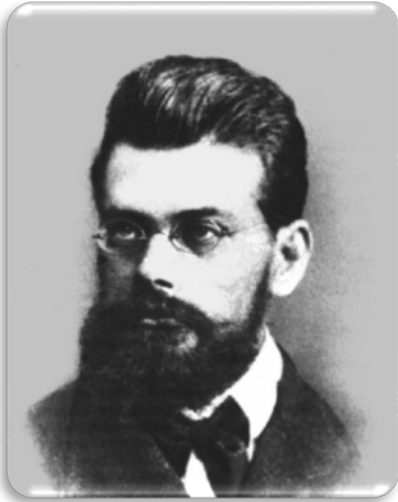

$S = K \times \ln \Omega$   
(Boltzmann formula)

**“The general struggle for existence of animate beings is therefore not a struggle for raw materials - these, for organisms, are air, water and soil, all abundantly available - nor for energy which exists in plenty in any body in the form of heat (albeit unfortunately not transformable), **but a struggle for entropy**, which becomes available through the transition of energy from the hot Sun to the cold Earth.**

Boltzmann L. The second law of thermodynamics. In *Theoretical physics and philosophical problems* (pp. 13-32). Dordrecht, Netherlands: Springer, 1974.

This is because life relies on microscopic particles in moving states  
not in static states



## Let's look how Wikipedia cited these sentences? ([https://en.wikipedia.org/wiki/Entropy\\_and\\_life](https://en.wikipedia.org/wiki/Entropy_and_life))

**“The general struggle for existence of animate beings is therefore not a struggle for raw materials - these, for organisms, are air, water and soil, all abundantly available - nor for energy which exists in plenty in any body in the form of heat (albeit unfortunately not transformable), but a struggle for negative entropy, which becomes available through the transition of energy from the hot Sun to the cold Earth.”**

Why did Wikipedia intentionally add “negative” before “entropy” ?  
Which is wrong on this topic, Wikipedia or Boltzmann?



# “Negative entropy (negentropy)” promoted by Erwin Schrödinger \*

- Evolution leads to increase in biological order; this is likely contrary to the second law of thermodynamics which leads to increase in entropy (= decrease in thermodynamic order = increase in thermodynamic chaos) of isolated systems (Schrödinger's paradox)
- Many scientists and people assumed that an organism is a system with low entropy, and that an organism keeps low entropy through metabolism by absorbing low-entropy matter and discharging high-entropy matter, and thus the notion of “negative entropy (negentropy)” was established
- Negative entropy (negentropy) = Entropy of fed matter (low entropy) – Entropy of discharged matter (high entropy)

\*Schrödinger E. What is life – the physical aspect of the living cell.  
Cambridge University Press, 1944.



# We believe negentropy is wrong in this field

The biological order in my body is primarily established through long-term natural selection and is encoded by my genome, not due to a short-time metabolic effect of negentropy, and not due to the food I eat !

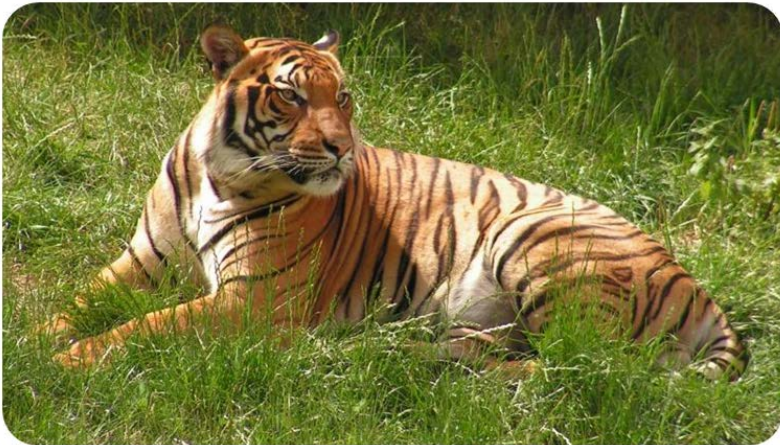

- Food provide little direction for the orderly movement of microscopic particles in the tiger
- Genomic sequences provide vast direction for the orderly movement of microscopic particles in the tiger





# Negentropy is wrong to assume that all orders in the world are equal to thermodynamic order

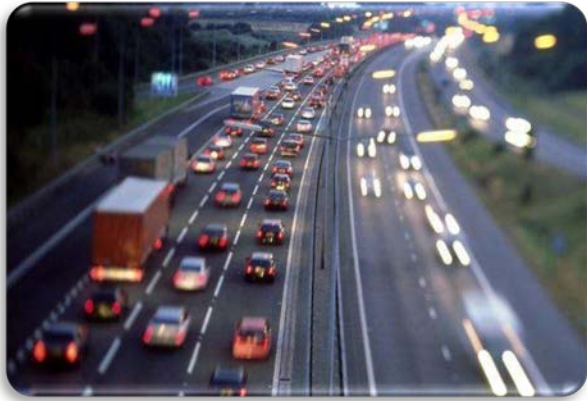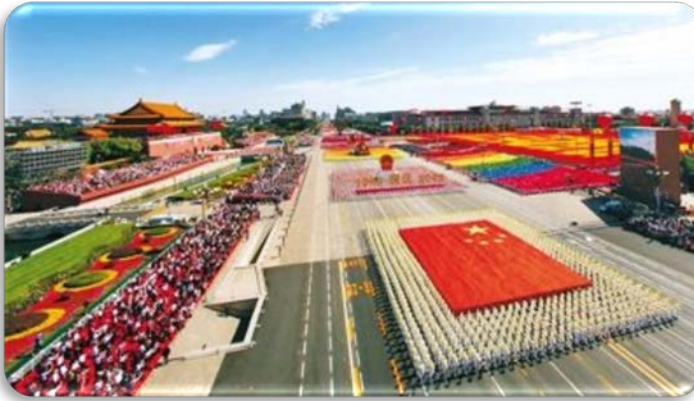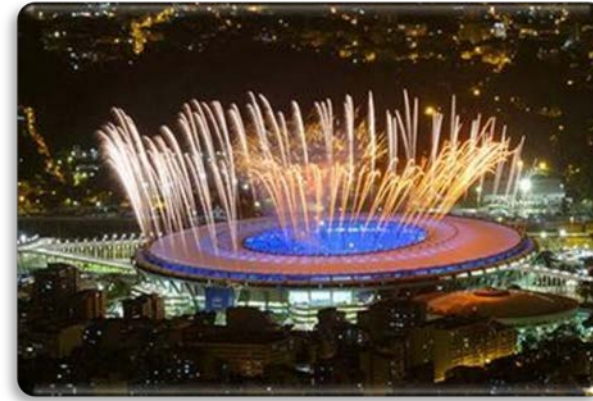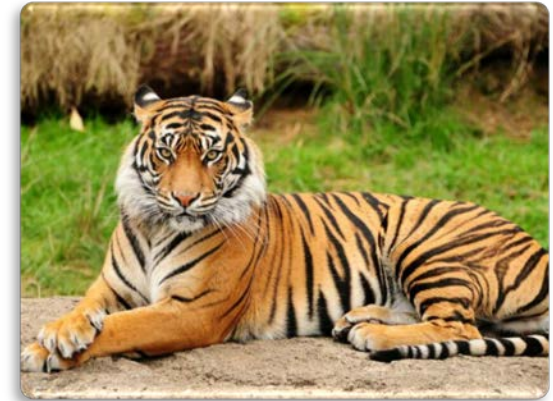

- These systems have high entropy because they have many microscopic particles in rapid movement (namely that they have many microstates)
- The order of these systems is different from thermodynamic order where microscopic particles are in relatively static states



# Biological order is different from thermodynamic order

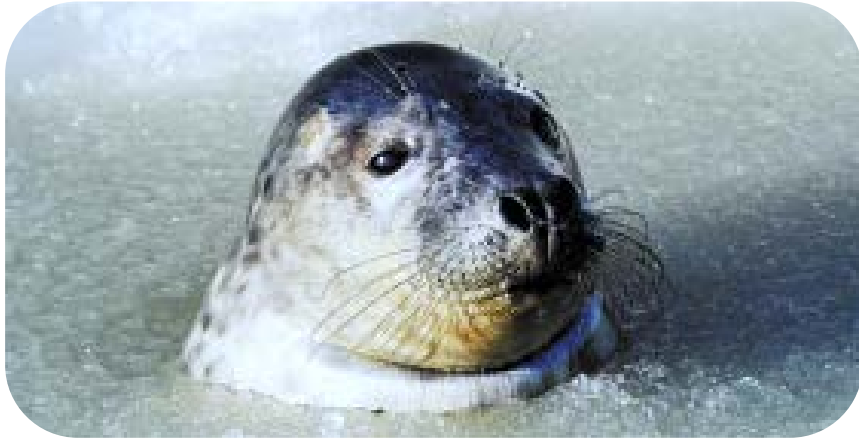

When this seal is releasing heat and  
dying in the ice

Its entropy is declining  
Its thermodynamic order is increasing  
Its biological order is decreasing

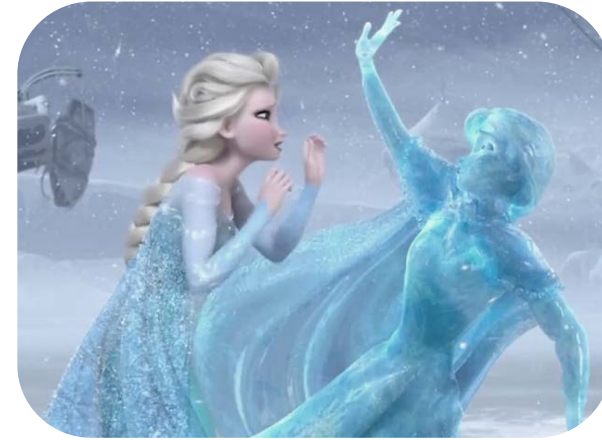

When this frozen girl is reviving for  
absorbing heat

Her entropy is increasing ( $dS \geq \delta Q/T$ )  
Her thermodynamic order is declining  
Her biological order is increasing





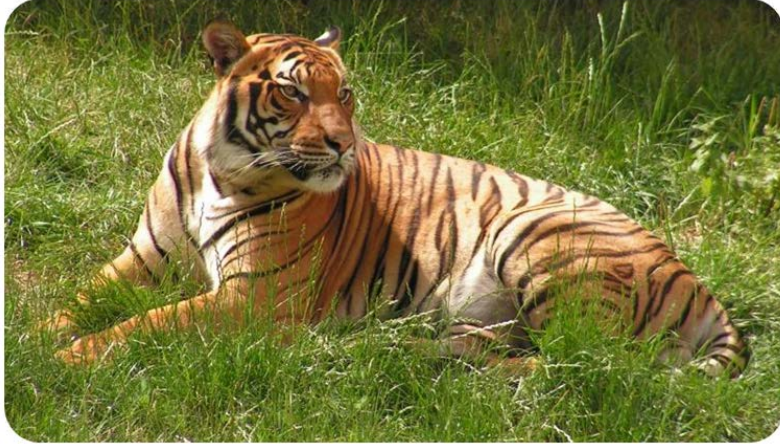

The high biological order in my body supports the high entropy of my body, or to say, supports relatively rapid movement of many microscopic particles in my body

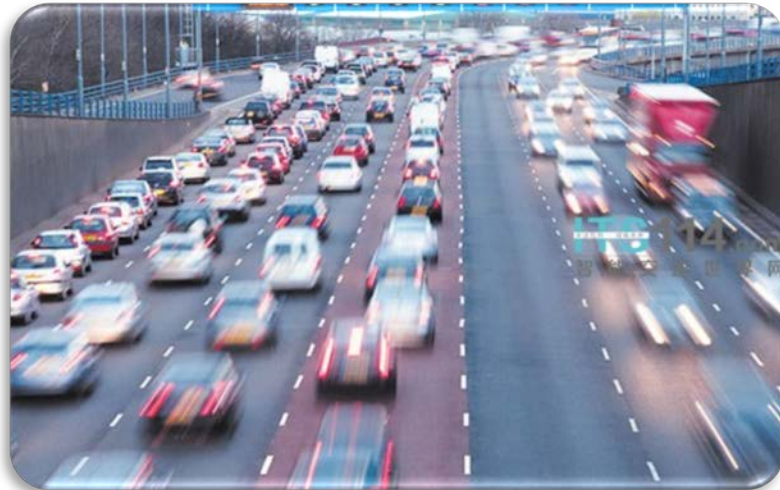

This is similar to the fact that the traffic order supports relatively rapid running of cars in a metropolis

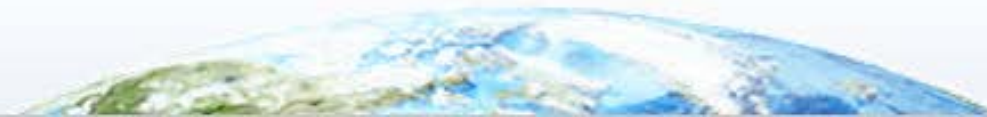

# Short-time increase of entropy

## Long-term accumulation of biological order

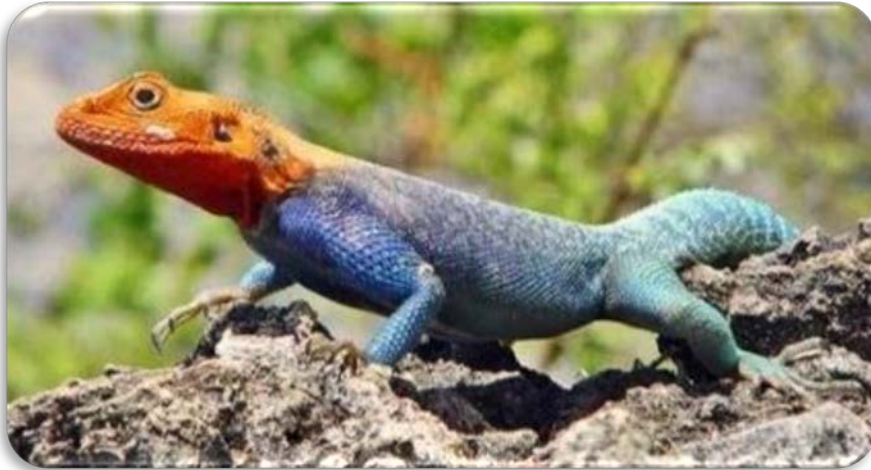

My entropy can be increased rapidly through absorbing heat from the sunlight ( $dS \geq \delta Q/T$ )

My biological order is primarily accumulated slowly through long-term natural selection



## Erwin Schrödinger likely knew that the notion “negative entropy” is wrong

- When Erwin Schrödinger proposed “negative entropy”, he met dramatic criticism from physicists
  - He stated: if I had been catering for them alone, I should have let the discussion turn on free energy instead \*
- He likely knew that “negative entropy” is wrong
  - He was reluctant to abandon “negative entropy”
  - We agree that free energy is superior to negative entropy for evolutionary issues, but the explanations based on free energy are much more complex than the CBET
  - The notion negative entropy has been criticized for decades

\*Schrödinger E. What is life – the physical aspect of the living cell. Cambridge University Press, 1944.



## Another incorrect notion regarding entropy

- The wrong notion is that a pile of books placed **orderly** is claimed to have less entropy than the same pile of books placed **messily**
  - In effect, the entropy of this pile of books changes little no matter whether they are arranged orderly or messily, since the books absorb little heat from the surroundings and release little heat to the surroundings through the arrangement
- 
- The **macroscopic** chaos/order of the books we observe with eyes is different from the chaos/order of the books at the **microscopic** level which determines the entropy of the books
  - A pile of books became messily, not because of **thermodynamics**, but because of **Newtonian mechanics** (e.g. thrown by hands)



# Information has also been linked elusively to entropy or negentropy

## Entropy, not Negentropy

WOOLHOUSE<sup>1</sup> remarks that the work of Shannon and Brillouin showed the fundamental relationship between information defined as  $I = -\sum P_i \log P_i$  (where  $0 \leq P_i \leq 1$ ,  $\sum P_i = 1$  and  $P_i$  is the relative probability of the  $i$ th symbol generated by a source), and entropy defined in statistical terms as  $S = -k \sum P_i \log P_i$  (where  $\sum P_i = 1$  and  $P_i$  is, in this case, the probability of an idealized physical system being in the state  $i$  of  $n$  possible equivalent states or complexions). It is the unwarranted extrapolation of this relationship to biological systems which, Woolhouse says, leads to erroneous conclusions. He points to the warning given by Brillouin himself, that the theory of information ignores the value or the meaning of the information which is quantified by the definition. Yet in spite of these warnings by Brillouin, the confusion is already present in his work even before its extension to biology.

Wilson JA. Entropy, not negentropy. Nature, 1968;219:535-536

- The link between information and entropy is controversial as exemplified by the left comments
- The information “I will go to Australia next month” has elusive influence on the information of the movement of microscopic particles in my body
- It hence **makes confusion** to discuss information without mention of the **hierarchy**
- The **microscopic** entropy, chaos, order, and information should not be extrapolated to the **macroscopic** world in a straightforward way





Biological order is definitely different from thermodynamic order

Now I understand why evolution is consistent with, not contrary to, the second law of thermodynamics

Today I realize that I have been misled by the wrong notion of negative entropy for decades

The CBET could make breakthroughs not only in biology, but also in social sciences and physics

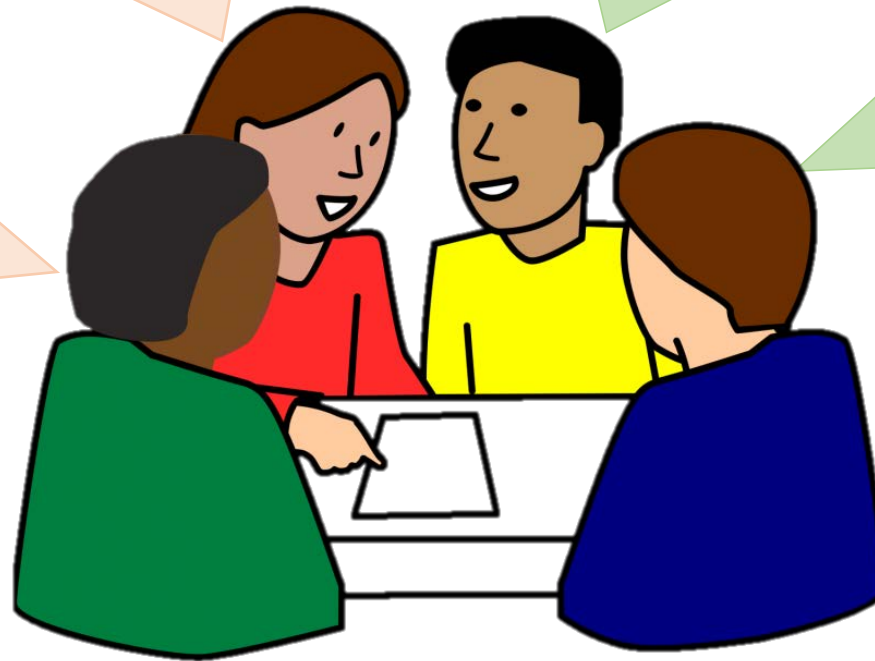

Yes. Maxwell's demon facilitates those rapidly-moving molecules to enter a compartment, and inhibits those slowly-moving molecules to enter this compartment

This demon was created to change the decaying tendency of the second law of thermodynamics. But no one has proved that this demon could exist in physics

I have heard that the famous physicist James Clerk Maxwell created a demon to link evolution and entropy

The CBET suggests that, in chemistry, natural selection could be "Maxwell's demon"!

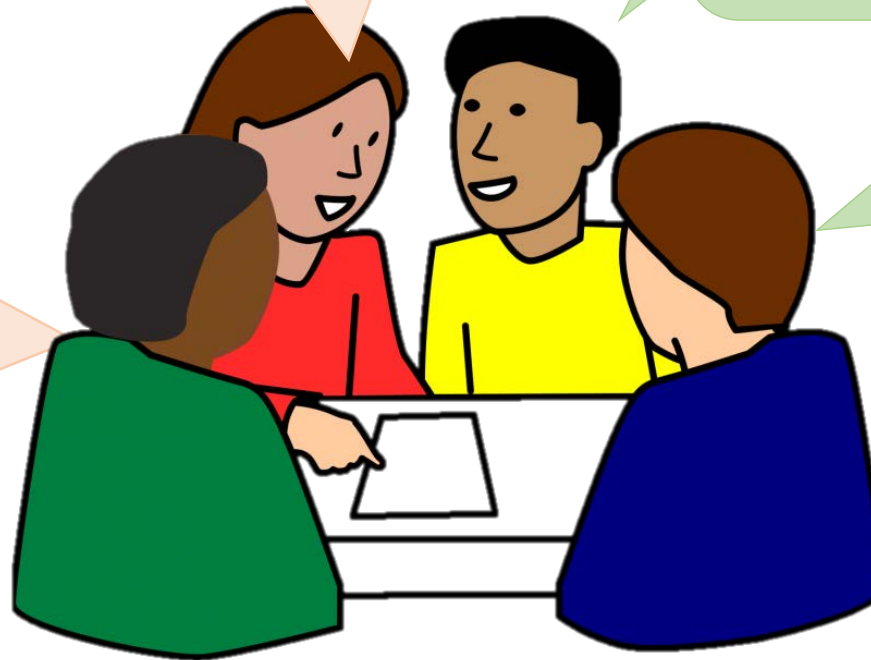

# Natural selection is Maxwell's demon, which changes the second law of thermodynamics from a decaying force to a progressive force

Fit HHCBEs can survive for some time and fitter HHCBEs shall have larger amounts, which increases the fitness of HHCBEs and hence has the same effect of Maxwell's demon

Some LHCBEs chemically change to HHCBEs after absorbing heat as per thermodynamics and chemistry; HHCBEs naturally separate themselves from LHCBEs

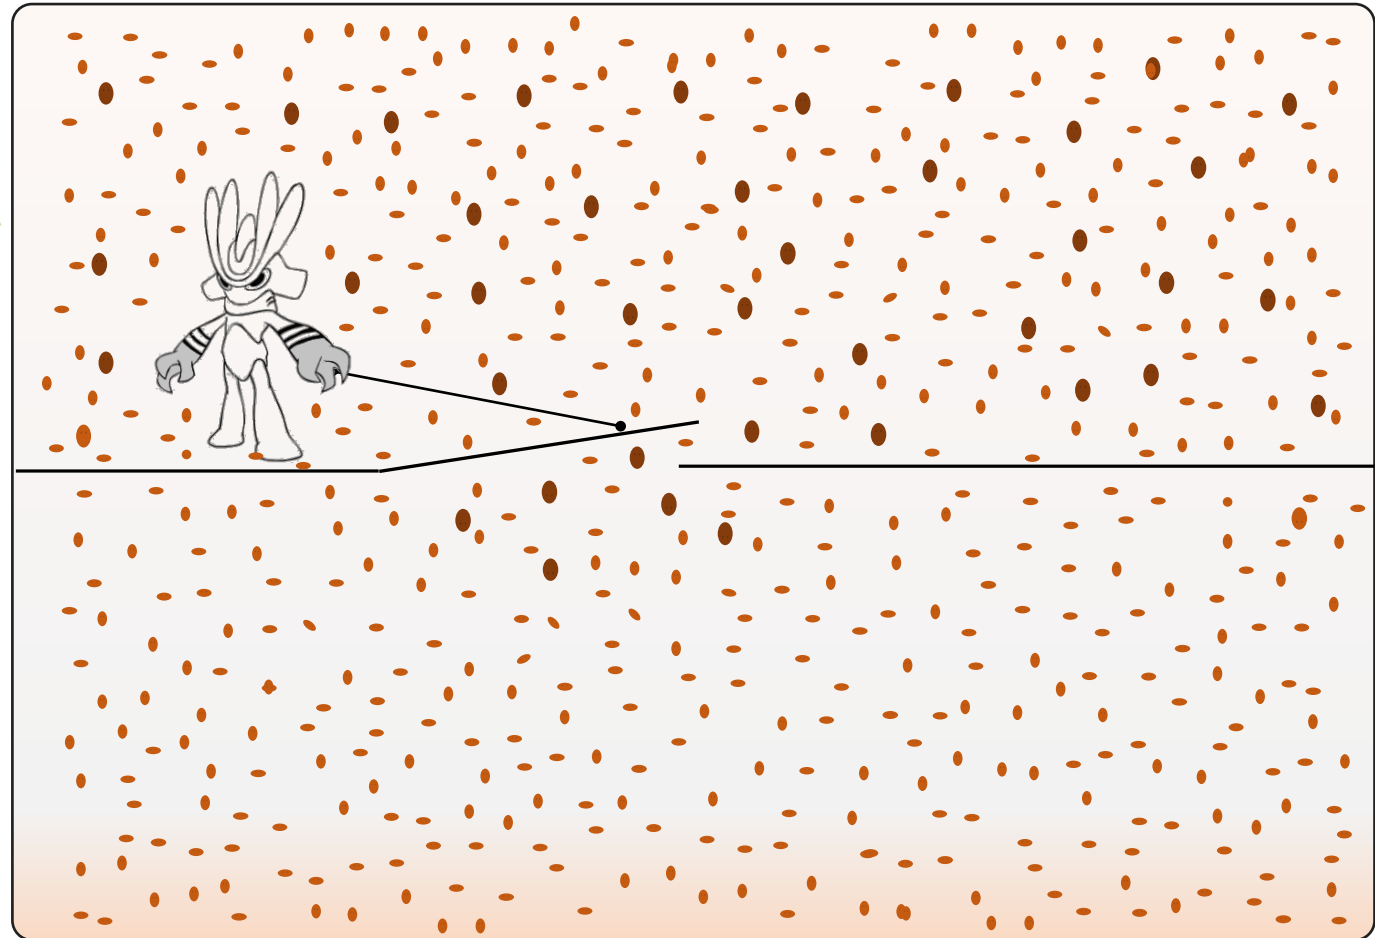

HHCBEs: higher-hierarchy carbon-based entities, e.g. proteins as compared with amino acids

LHCBEs: lower-hierarchy carbon-based entities, e.g. amino acids as compared with proteins



The CBET employs several logics for simply explaining complex issues

Evolution is so interesting and complex!

The first is the system logic which means that a system is grander than its components. Accordingly, an HHCBE can have some complicated functions that its components do not have, due to interaction of its components. This constitutes the structure-function mechanism in the CBET

Accordingly, the complicated function of self-reproduction of cells, which stems from collaboration of numerous molecules, should not be ascribed to some molecules with the functions of self-reproduction through autocatalysis

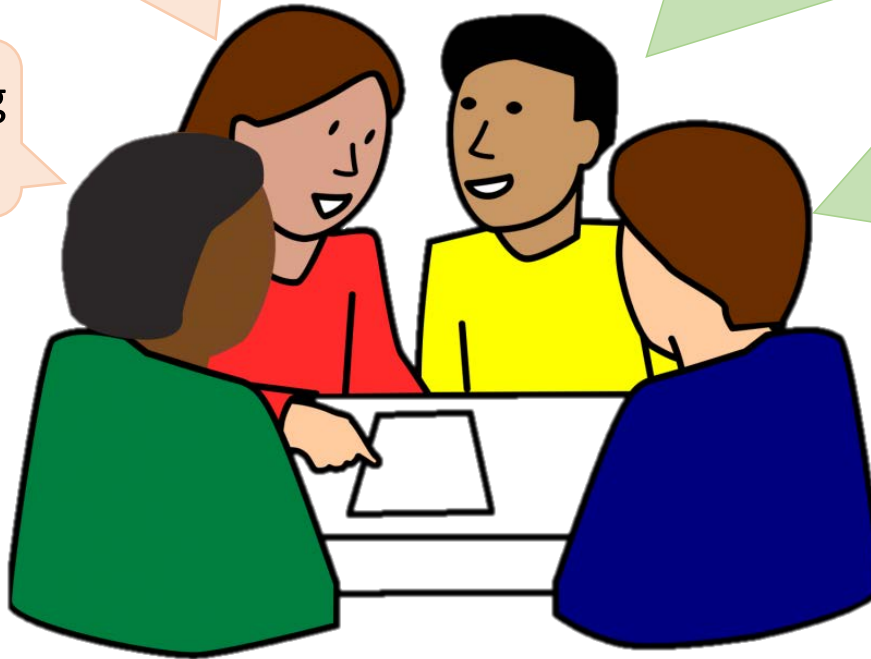

Hence an organism can simultaneously have high order in biology and high chaos in thermodynamics

The second is the perspective logic which means different perspectives of the same thing (e.g. the second law of thermodynamics) can be expressed differently and can be explained with each other

And accordingly, the function, fitness, collaboration, altruism, obeying rules, restriction of freedom regarding CBEs can describe the same thing from different perspectives

This logic also suggests that a complex issue (e.g. evolution) is better to be explained through multidisciplinary integration in order to observe its panorama

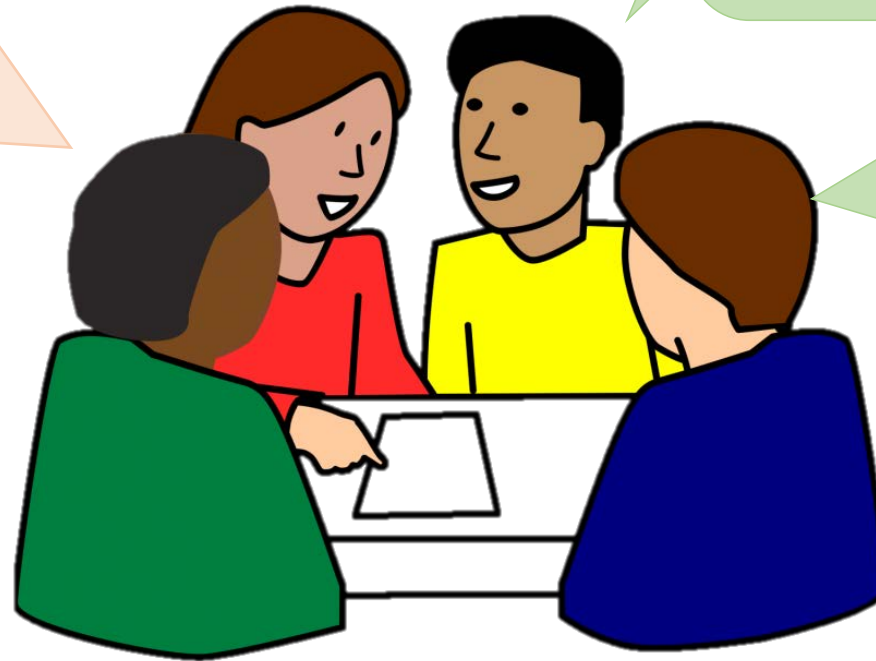

- 1 History & background of the CBET
- 2 The primary driving force of evolution
- 3 The mechanisms of evolution
- 4 Reliability & significance of the CBET
- 5 Questions & answers
- 6 Generalization of the CBET**



# One sentence to summarize the CBET

“Natural selection” links the CBET and the existing mainstream evolutionary theories

Evolution is the increase in the amount, diversity, and fitness of higher-hierarchy carbon-based entities under **natural selection** and **driven by the organic synthesis tendency** on the Earth which stems from the thermodynamic features of the Earth

“Natural selection” in the CBET is more scientific and comprehensive than “natural selection” in the existing evolutionary theories, and leads to increase in the fitness of HHCBEs

The words “driven by the organic synthesis tendency” include the primary driving force of evolution, which leads to increase in hierarchy, diversity, and complicated functions of CBEs under natural selection

## One sentence to summarize the CBET

Evolution is the increase in the **amount, diversity**, and fitness of **higher-hierarchy carbon-based entities** under natural selection and **driven by the organic synthesis tendency on the Earth** which stems from the thermodynamic features of the Earth

The concept of “carbon-based entities” is more comprehensive than “organisms” in the existing mainstream evolutionary theories

The above red words express some respects which have not been mentioned by the existing mainstream evolutionary theories



# Major concepts and views of the CBET

(The existing mainstream theories largely correspond to only the blue part of this figure)

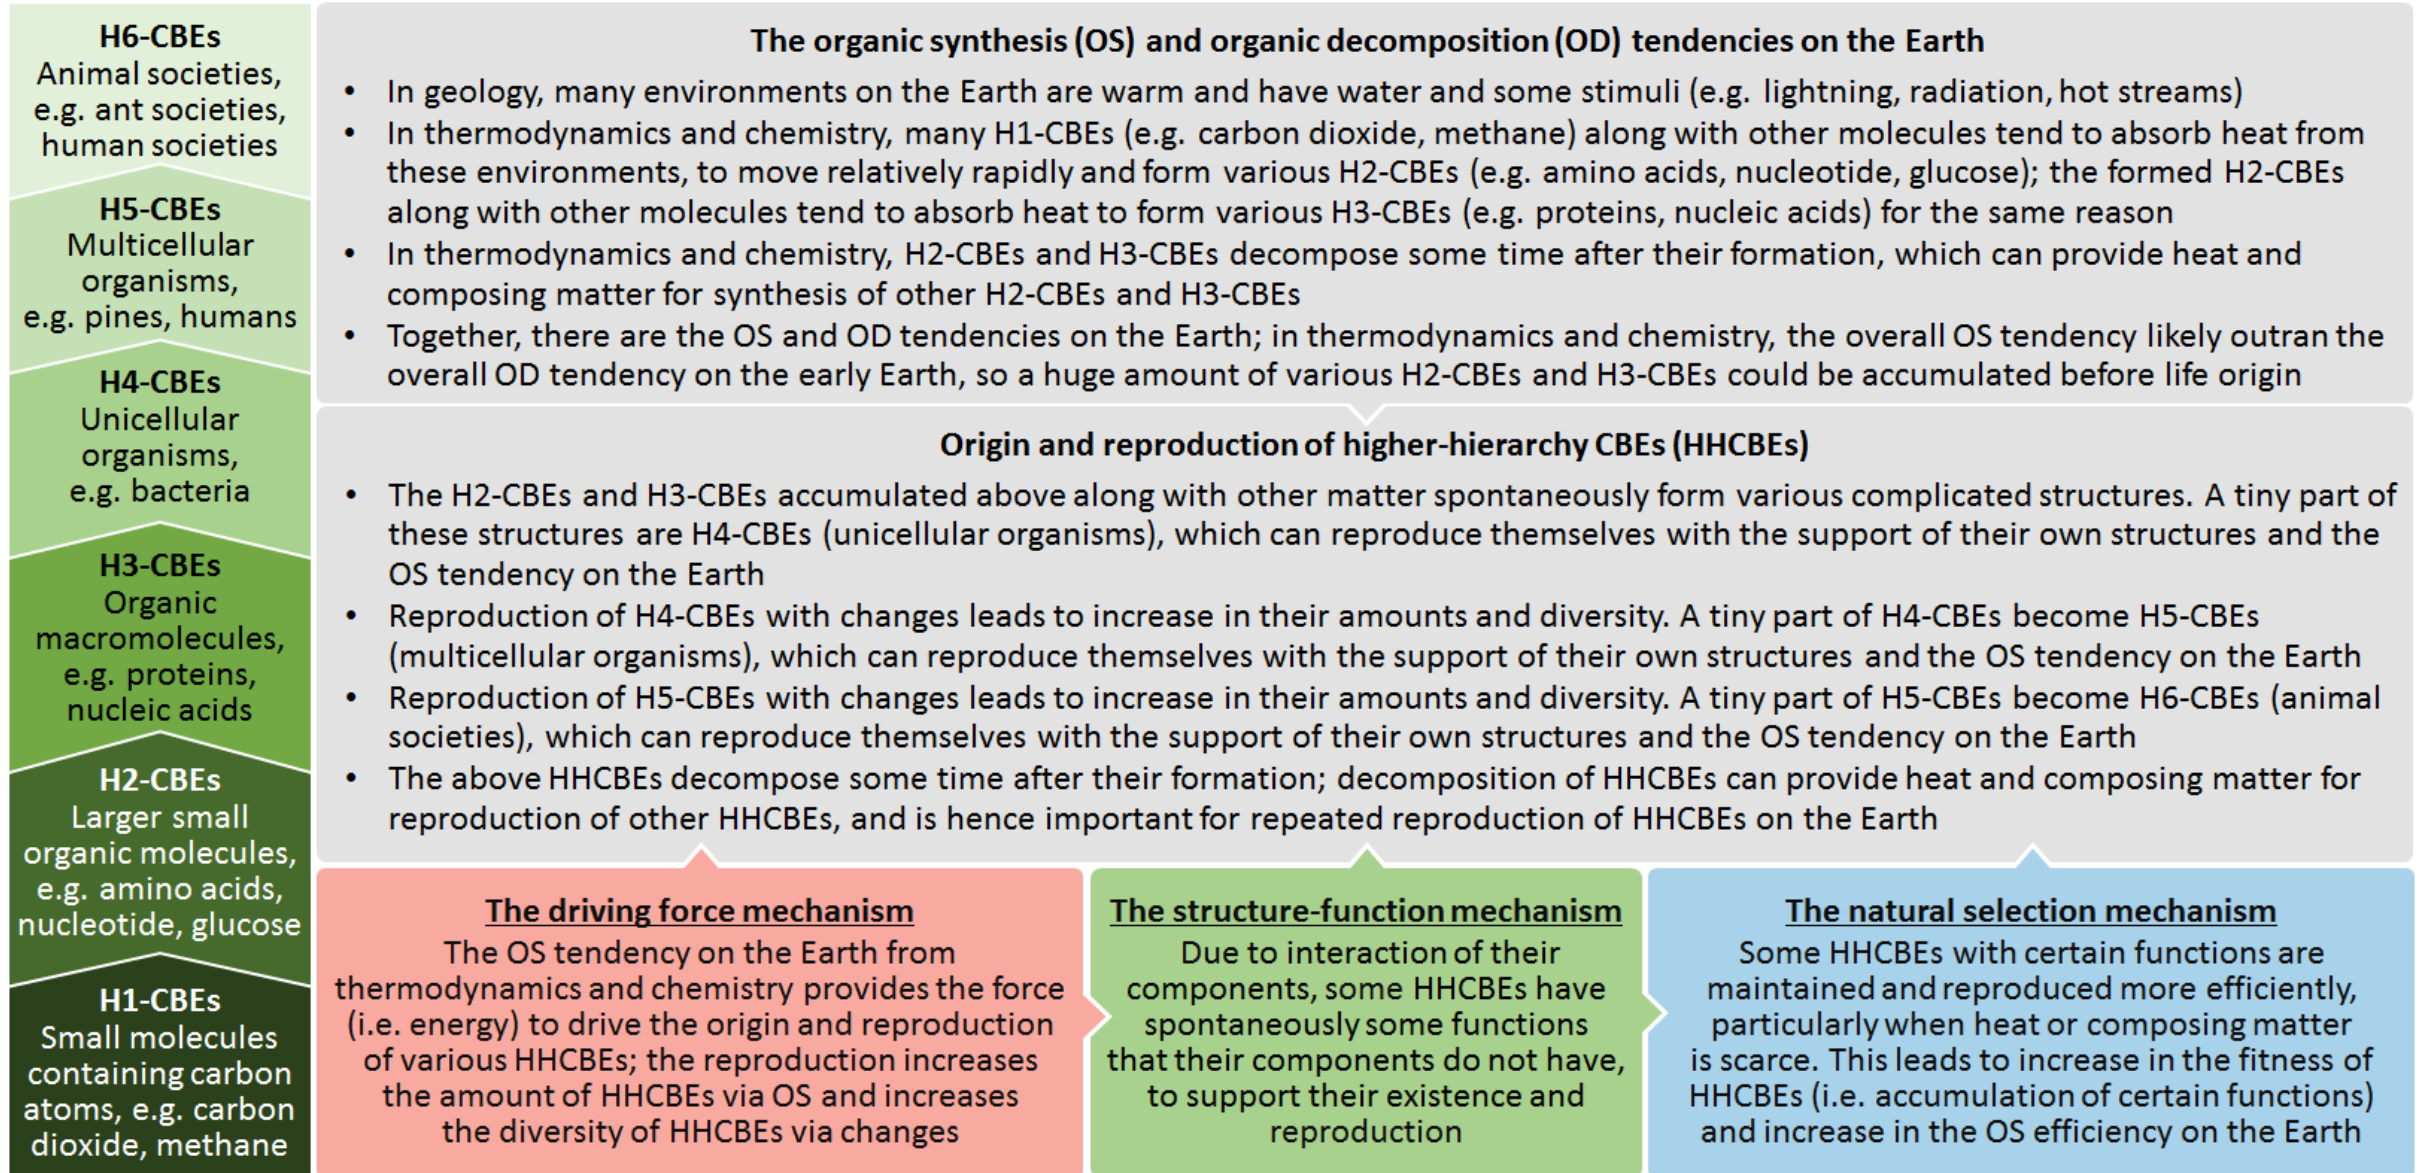

# Achieved the aims of the CBET? Need time to test...

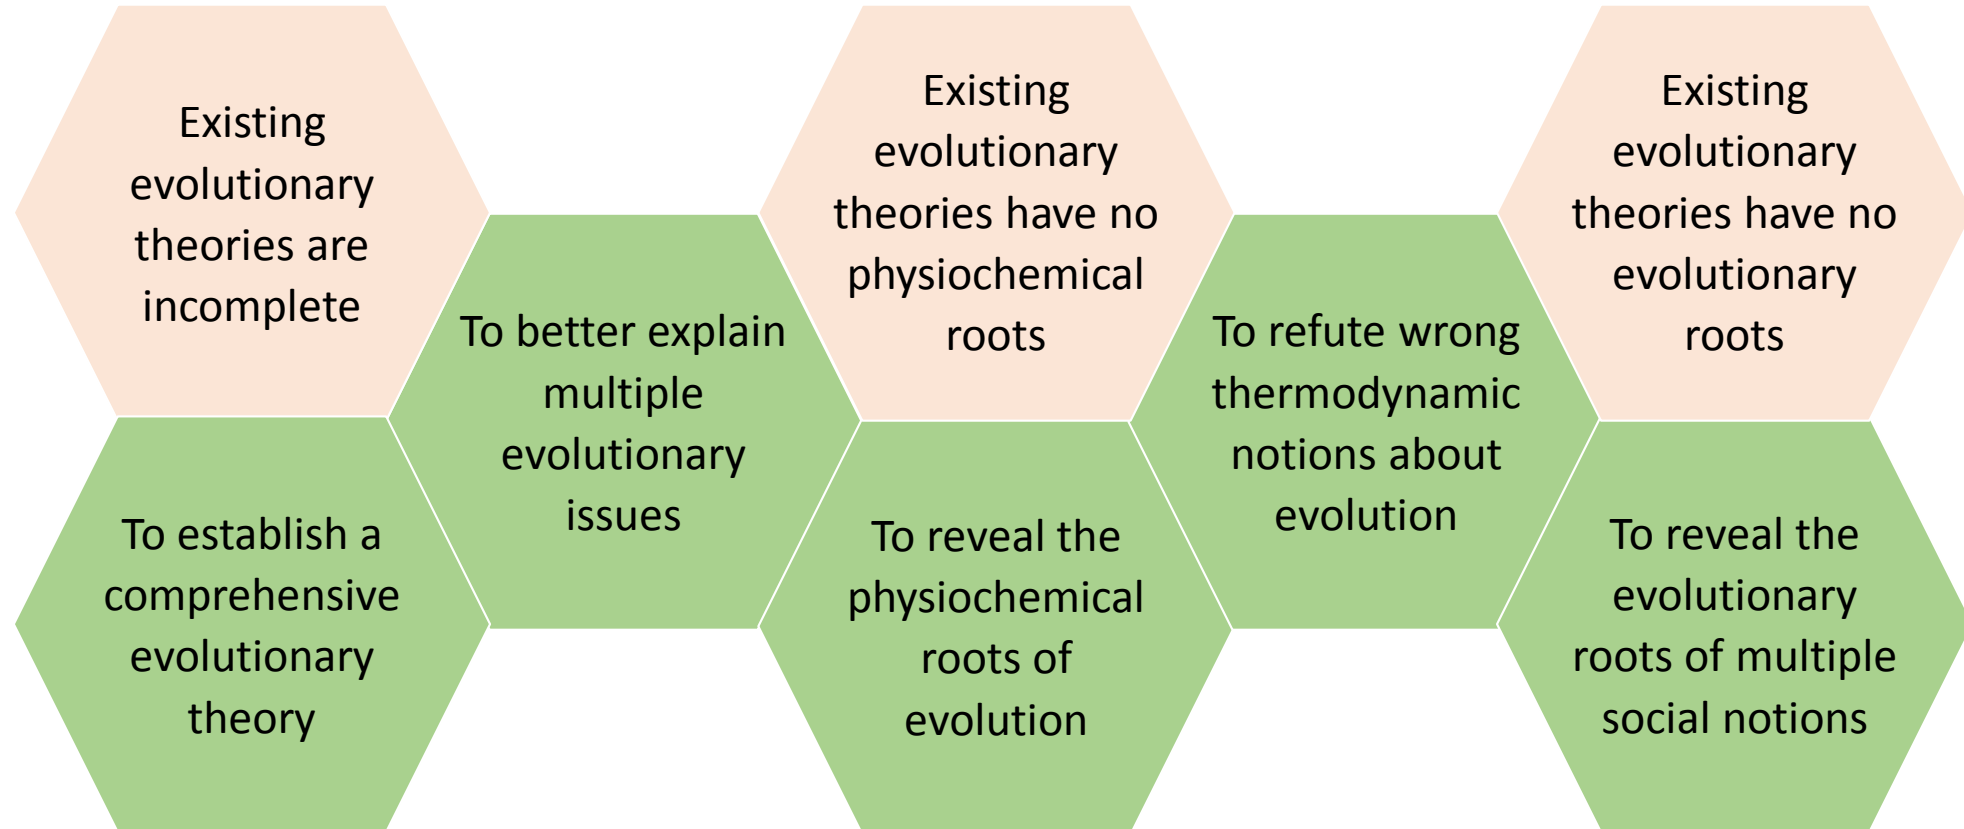



# Why these aims could be achieved?

| Important factors for life origin and evolution                                            | Employed by the CBET | Employed by existing theories |
|--------------------------------------------------------------------------------------------|----------------------|-------------------------------|
| The second law of thermodynamics (particularly its simple expression)                      | Yes                  | Seldom if not no              |
| The thermodynamic features of the Earth<br>(many warm environments with water and stimuli) | Yes                  | Seldom if not no              |
| The leading actor throughout life origin and evolution (namely CBEs)                       | Yes                  | Seldom if not no              |
| The features and chemical reactions of CBEs related to evolution                           | Yes                  | Seldom                        |
| Logics for simply explaining complex issues                                                | Yes                  | Seldom                        |
| Integration of geology, physics, chemistry, and biology<br>using the above five factors    | Yes                  | No                            |





# Thank you for your watching

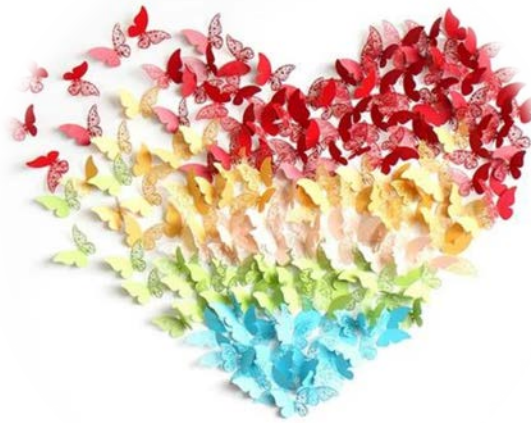

The CBET is open to optimization and extension

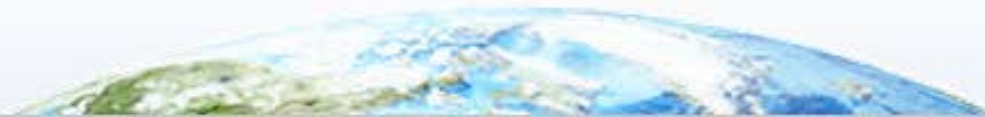

Supplement: Supplementary file 1 [file supplementary]
